# Supplementary material
Source: Research Square preprint supplement (doi:10.21203/rs.3.rs-9364791/v1)
Supplement: Supplementary file 1 [file 1af3015769f368d1f8ad8647.xlsx]

## Sheet: Feuille1
IDENTIFIERS				MACRO & SECTOR	PERFORMANCE (Dep. Vars.)			AI & DIGITALIZATION				INNOVATION				CONTROLS			INEQUALITY PROXIES
Firm Name	Firm ID	Country	Year	GDP Growth (%)	Revenue (€M)	Labor Prod. (€000/emp)	TFP Index	AI Adoption Idx	IT Invest. (€M)	Automation Lvl	Digital Intensity	R&D Exp. (€M)	Patents (n)	Innov. Index	AI × Innov. Idx	Employees (000s)	Capital Intensity	Skilled Lab. (%)	Log Revenue	Log Labor Prod.
Volkswagen AG	DE001	Germany	2000	2.9	49086.6	609.8	1.015	0.03	558.8	0.1	0.033	2222.3	2040	10	0.3	80.5	1202	35.3	10.8013	6.41313
Volkswagen AG	DE001	Germany	2001	1.5	50341.2	588.1	0.987	0.074	692.6	0.4	0.073	2395.1	5495	10	0.74	85.6	1018.85	39.2	10.8266	6.3769
Volkswagen AG	DE001	Germany	2002	0	51385.4	595.4	1.058	0.082	671.4	0.4	0.077	2184.8	7464	10	0.82	86.3	1051.7	34.3	10.8471	6.38923
Volkswagen AG	DE001	Germany	2003	-0.7	52565.1	700.9	1.04	0.056	579.8	0.3	0.057	2394.2	5087	10	0.56	75	1293.68	41.6	10.8698	6.55237
Volkswagen AG	DE001	Germany	2004	1.2	57156.6	730.9	1.102	0.124	808.2	0.7	0.116	2920.9	8240	10	1.24	78.2	1357.57	34.6	10.9536	6.59428
Volkswagen AG	DE001	Germany	2005	0.7	55125.1	632.2	1.089	0.157	798.3	0.8	0.139	2241.8	2542	10	1.57	87.2	1064.91	39	10.9174	6.44921
Volkswagen AG	DE001	Germany	2006	3.7	67098.8	899.4	1.087	0.138	1074.5	0.8	0.142	2826	7953	10	1.38	74.6	1650.1	36.2	11.1139	6.80173
Volkswagen AG	DE001	Germany	2007	3.3	69264.4	870.2	1.128	0.161	1053.1	0.8	0.157	2786.5	8575	10	1.61	79.6	1464.36	40.6	11.1457	6.76872
Volkswagen AG	DE001	Germany	2008	1.1	63505.6	795.8	1.109	0.201	1139.1	0.9	0.203	2644.8	7077	10	2.01	79.8	1426.12	36.1	11.0589	6.67935
Volkswagen AG	DE001	Germany	2009	-5.7	48793.2	582.3	1.141	0.252	1009	1.5	0.223	2497.9	7141	10	2.52	83.8	1066.95	43.7	10.7953	6.36699
Volkswagen AG	DE001	Germany	2010	4.2	92702.6	1213.4	1.168	0.197	1555.8	1	0.194	4667.7	5075	10	1.97	76.4	2279.21	40.7	11.4372	7.10118
Volkswagen AG	DE001	Germany	2011	3.9	95674	1092.2	1.189	0.261	1735.5	1.3	0.28	5005.4	12269	10	2.61	87.6	2007.55	44.8	11.4687	6.99595
Volkswagen AG	DE001	Germany	2012	0.4	78664	1024.3	1.228	0.292	1591.9	1.3	0.286	3096.6	5975	10	2.92	76.8	1770.43	46.3	11.2729	6.93176
Volkswagen AG	DE001	Germany	2013	0.4	79338.8	998	1.234	0.312	1694.8	1.4	0.295	3214.2	5738	10	3.12	79.5	1935.17	48.7	11.2815	6.90575
Volkswagen AG	DE001	Germany	2014	1.9	91647.1	1134.2	1.277	0.339	1952.5	2	0.293	4623	11656	10	3.39	80.8	2064.5	46.9	11.4257	7.03368
Volkswagen AG	DE001	Germany	2015	1.5	99863.9	1115.8	1.329	0.374	2812.2	1.8	0.352	4535.9	12953	10	3.74	89.5	1944.4	43.2	11.5116	7.01733
Volkswagen AG	DE001	Germany	2016	2.2	117293	1294.6	1.304	0.441	3295.9	2.5	0.497	5804.2	18206	10	4.41	90.6	2258.78	38.9	11.6724	7.16596
Volkswagen AG	DE001	Germany	2017	2.5	117918	1324.9	1.308	0.458	3839.1	2.1	0.445	5387.3	6264	10	4.58	89	2553.39	51.5	11.6777	7.18909
Volkswagen AG	DE001	Germany	2018	1.5	114843	1466.7	1.277	0.483	3653.9	2.4	0.48	4624.5	11852	10	4.83	78.3	2655.67	51.1	11.6513	7.29077
Volkswagen AG	DE001	Germany	2019	0.6	101194	1360.1	1.357	0.476	2791.5	2.3	0.516	4392.6	14548	10	4.76	74.4	2545.29	45	11.5248	7.21531
Volkswagen AG	DE001	Germany	2020	-4.1	57848	653.6	1.372	0.585	1851.9	3.3	0.553	2523.5	2148	10	5.85	88.5	1060.03	49.5	10.9656	6.4825
Volkswagen AG	DE001	Germany	2021	2.6	153317	1812.3	1.378	0.585	5637.4	2.4	0.602	7486	17447	10	5.85	84.6	3317.29	48.1	11.9403	7.50235
Volkswagen AG	DE001	Germany	2022	1.8	132731	1493	1.4	0.62	4716	2.6	0.695	5846	16030	10	6.2	88.9	2880.43	52	11.7961	7.30854
Volkswagen AG	DE001	Germany	2023	-0.3	105847	1341.5	1.385	0.645	3272.3	3.2	0.734	5423.6	18756	10	6.45	78.9	2634.46	46.7	11.5698	7.20154
Volkswagen AG	DE001	Germany	2024	-0.2	111295	1430.5	1.44	0.685	4595.1	3	0.667	4699.8	5806	10	6.85	77.8	2469.9	64.5	11.6199	7.26578
Volkswagen AG	DE001	Germany	2025	0.5	143321	1698.1	1.446	0.647	5633.4	3.5	0.641	7047.2	20738	10	6.47	84.4	2905.72	56.4	11.8728	7.43727
BMW Group	DE002	Germany	2000	2.9	40808.7	605.5	1.016	0.045	538.2	0.2	0.052	1744.7	4786	10	0.45	67.4	1081.37	38.7	10.6167	6.40605
BMW Group	DE002	Germany	2001	1.5	42754.6	642.9	1.04	0.097	600.9	0.5	0.11	1537.9	2891	10	0.97	66.5	1221.65	38.9	10.6632	6.46599
BMW Group	DE002	Germany	2002	0	43680.3	661.8	1.067	0.095	551.9	0.5	0.105	1622.1	3006	10	0.95	66	1249.65	38.7	10.6847	6.49496
BMW Group	DE002	Germany	2003	-0.7	45029.1	628	1.038	0.137	659.1	0.7	0.134	1788.9	5047	10	1.37	71.7	1057.27	43.5	10.7151	6.44254
BMW Group	DE002	Germany	2004	1.2	47629.6	679.5	1.065	0.131	780.8	0.7	0.141	1805.1	2298	10	1.31	70.1	1302.05	45.1	10.7712	6.52136
BMW Group	DE002	Germany	2005	0.7	46146.5	729	1.097	0.145	800.6	0.7	0.14	1769.8	5690	10	1.45	63.3	1329.65	29.5	10.7396	6.59167
BMW Group	DE002	Germany	2006	3.7	56128.7	885.3	1.066	0.162	1044.2	0.7	0.143	2707	2488	10	1.62	63.4	1490.34	41.3	10.9354	6.78593
BMW Group	DE002	Germany	2007	3.3	60663.9	888.2	1.126	0.183	996.9	0.9	0.187	2291.2	6306	10	1.83	68.3	1500.66	40.9	11.0131	6.7892
BMW Group	DE002	Germany	2008	1.1	57983.7	778.3	1.119	0.177	1102.9	0.8	0.18	2693.5	3519	10	1.77	74.5	1271.65	45.4	10.9679	6.65711
BMW Group	DE002	Germany	2009	-5.7	35681.4	516.4	1.152	0.194	546.3	1	0.195	1636.5	5614	10	1.94	69.1	889.392	38.4	10.4824	6.24688
BMW Group	DE002	Germany	2010	4.2	79094.2	1220.6	1.193	0.248	1369.1	1.5	0.234	3793.9	11661	10	2.48	64.8	2388.59	40.5	11.2784	7.1071
BMW Group	DE002	Germany	2011	3.9	78141.7	1205.9	1.197	0.297	1954.5	1.3	0.257	2986.6	8845	10	2.97	64.8	2292.1	53.1	11.2663	7.09498
BMW Group	DE002	Germany	2012	0.4	61939.4	948.5	1.185	0.298	1559.3	1.5	0.296	2575.7	8296	10	2.98	65.3	1685.09	36.4	11.0339	6.85488
BMW Group	DE002	Germany	2013	0.4	69251.6	948.7	1.177	0.331	1499.6	1.4	0.376	2623.5	4632	10	3.31	73	1814.17	51	11.1455	6.85509
BMW Group	DE002	Germany	2014	1.9	81113.4	1109.6	1.227	0.387	1985.7	1.7	0.418	3822	11224	10	3.87	73.1	1941.72	46.9	11.3036	7.01175
BMW Group	DE002	Germany	2015	1.5	82175.8	1085.5	1.236	0.354	1722.1	2.1	0.344	3076.8	8091	10	3.54	75.7	2106.35	43	11.3166	6.9898
BMW Group	DE002	Germany	2016	2.2	85038.9	1248.7	1.241	0.411	2234.5	2.4	0.429	3842.1	4088	10	4.11	68.1	2040.32	36.1	11.3509	7.12986
BMW Group	DE002	Germany	2017	2.5	103491	1577.6	1.262	0.462	3272.3	2.1	0.478	4379.8	12311	10	4.62	65.6	2782.45	54.3	11.5472	7.36366
BMW Group	DE002	Germany	2018	1.5	95949.3	1341.9	1.288	0.484	2634.6	2.7	0.467	4425.6	3832	10	4.84	71.5	2638.04	55.4	11.4716	7.20184
BMW Group	DE002	Germany	2019	0.6	89191.7	1230.2	1.274	0.504	2803.4	2.2	0.563	3555.3	4467	10	5.04	72.5	2338.1	38.6	11.3985	7.11493
BMW Group	DE002	Germany	2020	-4.1	53658.6	828.1	1.31	0.529	1460.2	2.9	0.498	2334.6	5714	10	5.29	64.8	1444.63	53.5	10.8904	6.71913
BMW Group	DE002	Germany	2021	2.6	124292	1775.6	1.321	0.52	4312.5	2.6	0.515	5638.5	15677	10	5.2	70	3178.53	59.1	11.7304	7.48189
BMW Group	DE002	Germany	2022	1.8	117265	1532.9	1.345	0.634	3778.1	3.2	0.697	4657.6	10608	10	6.34	76.5	2606.84	55	11.6722	7.33492
BMW Group	DE002	Germany	2023	-0.3	91752.8	1297.8	1.378	0.666	3304.2	2.8	0.726	4036.1	11127	10	6.66	70.7	2185.09	58.6	11.4269	7.16843
BMW Group	DE002	Germany	2024	-0.2	95357.7	1508.8	1.339	0.658	3905.7	2.9	0.743	4567.8	10441	10	6.58	63.2	2830.88	46.4	11.4654	7.31907
BMW Group	DE002	Germany	2025	0.5	114576	1571.7	1.384	0.703	4523.1	4.1	0.652	4773.6	13534	10	7.03	72.9	2754.91	63	11.649	7.35991
Mercedes-Benz Group AG	DE003	Germany	2000	2.9	34301.5	625.9	1.008	0.035	361.5	0.2	0.034	1310.1	1402	10	0.35	54.8	1045.52	28.3	10.4429	6.43919
Mercedes-Benz Group AG	DE003	Germany	2001	1.5	36126.8	600.1	1.016	0.041	421	0.2	0.04	1319.7	4103	10	0.41	60.2	1185.55	39.1	10.4948	6.3971
Mercedes-Benz Group AG	DE003	Germany	2002	0	35025.9	536.4	0.992	0.121	558.3	0.5	0.132	1378	3086	10	1.21	65.3	959.025	40.4	10.4638	6.28488
Mercedes-Benz Group AG	DE003	Germany	2003	-0.7	35542.1	535.3	1.021	0.077	501.8	0.4	0.086	1503	1580	10	0.77	66.4	930.331	36.9	10.4785	6.28283
Mercedes-Benz Group AG	DE003	Germany	2004	1.2	41230.8	693	1.031	0.069	512.4	0.4	0.064	1766.9	4200	10	0.69	59.5	1190.03	38.1	10.6269	6.54103
Mercedes-Benz Group AG	DE003	Germany	2005	0.7	43442.1	771.6	1.024	0.133	588.5	0.8	0.151	1804	1770	10	1.33	56.3	1301.68	45.5	10.6792	6.64847
Mercedes-Benz Group AG	DE003	Germany	2006	3.7	53529.6	905.7	1.084	0.138	947	0.7	0.155	2132.9	2435	10	1.38	59.1	1550.31	37.1	10.888	6.80871
Mercedes-Benz Group AG	DE003	Germany	2007	3.3	51590.9	792.5	1.036	0.125	799.5	0.6	0.117	2001	4226	10	1.25	65.1	1337.49	36.1	10.8511	6.67519
Mercedes-Benz Group AG	DE003	Germany	2008	1.1	48798.9	847.2	1.096	0.12	739.7	0.6	0.132	1720.1	1697	10	1.2	57.6	1652.83	35	10.7955	6.74194
Mercedes-Benz Group AG	DE003	Germany	2009	-5.7	31493.1	523.1	1.192	0.205	550.2	1	0.203	1096.6	2931	10	2.05	60.2	941.779	44.7	10.3575	6.25977
Mercedes-Benz Group AG	DE003	Germany	2010	4.2	70561.7	1145.5	1.127	0.166	1193.8	0.8	0.158	2542.2	5655	10	1.66	61.6	2264.44	42.8	11.1642	7.0436
Mercedes-Benz Group AG	DE003	Germany	2011	3.9	71421.2	1196.3	1.127	0.256	1437.5	1.3	0.221	2898.4	6525	10	2.56	59.7	2076.94	34	11.1764	7.08699
Mercedes-Benz Group AG	DE003	Germany	2012	0.4	58039.4	1034.6	1.154	0.322	1170.9	1.5	0.352	1964.5	6468	10	3.22	56.1	1997.84	55.1	10.9689	6.94177
Mercedes-Benz Group AG	DE003	Germany	2013	0.4	54793.1	957.9	1.174	0.287	1058	1.5	0.276	2220.7	5609	10	2.87	57.2	1773.34	44.6	10.9113	6.86474
Mercedes-Benz Group AG	DE003	Germany	2014	1.9	69125.5	1111.3	1.185	0.342	1619.1	1.4	0.354	2829.8	9870	10	3.42	62.2	1869.56	43.5	11.1437	7.01329
Mercedes-Benz Group AG	DE003	Germany	2015	1.5	72788.7	1142.7	1.152	0.327	1633	1.9	0.371	2618.9	6804	10	3.27	63.7	2034.3	46.1	11.1953	7.04115
Mercedes-Benz Group AG	DE003	Germany	2016	2.2	82814.4	1445.3	1.177	0.409	2136.2	2	0.373	3610.4	9998	10	4.09	57.3	2638.55	55.2	11.3244	7.27607
Mercedes-Benz Group AG	DE003	Germany	2017	2.5	78225.1	1414.6	1.231	0.422	2085	2.2	0.422	3135.9	4924	10	4.22	55.3	2492.27	40.3	11.2673	7.2546
Mercedes-Benz Group AG	DE003	Germany	2018	1.5	78005.8	1196.4	1.244	0.439	1988.4	1.9	0.486	2919	5569	10	4.39	65.2	2167.64	46.8	11.2645	7.08707
Mercedes-Benz Group AG	DE003	Germany	2019	0.6	75515.6	1284.3	1.187	0.494	2062.1	2.7	0.544	3089.4	10138	10	4.94	58.8	2346.51	42.8	11.2321	7.15797
Mercedes-Benz Group AG	DE003	Germany	2020	-4.1	48063.1	818.8	1.298	0.512	1414.6	2.9	0.447	2032.7	7104	10	5.12	58.7	1403.01	51.9	10.7803	6.70784
Mercedes-Benz Group AG	DE003	Germany	2021	2.6	97976.1	1778.2	1.295	0.557	3459.2	3	0.511	3685.1	3402	10	5.57	55.1	3262.59	43.7	11.4925	7.48336
Mercedes-Benz Group AG	DE003	Germany	2022	1.8	103567	1703.4	1.307	0.629	3703.6	3.7	0.541	3931.4	8760	10	6.29	60.8	3164.77	49.4	11.548	7.44038
Mercedes-Benz Group AG	DE003	Germany	2023	-0.3	85045	1439	1.276	0.64	3452.6	2.6	0.721	3071.4	9542	10	6.4	59.1	2377	54.6	11.3509	7.2717
Mercedes-Benz Group AG	DE003	Germany	2024	-0.2	83924.5	1539.9	1.347	0.692	3084.7	3.2	0.754	3121.8	3820	10	6.92	54.5	2864.3	47.6	11.3377	7.33947
Mercedes-Benz Group AG	DE003	Germany	2025	0.5	97929.7	1584.6	1.33	0.695	3213.9	3.5	0.624	4009.1	5481	10	6.95	61.8	3034.6	64.7	11.492	7.36809
Continental AG	DE004	Germany	2000	2.9	24394.5	490.8	1.008	0.094	299.5	0.4	0.104	1127.9	2783	10	0.94	49.7	703.652	22.4	10.1021	6.19604
Continental AG	DE004	Germany	2001	1.5	27873.3	556.4	1.013	0.148	436.6	0.7	0.134	1361.8	2330	10	1.48	50.1	853.659	39	10.2354	6.32149
Continental AG	DE004	Germany	2002	0	25381.5	493.8	1.069	0.106	376.7	0.6	0.101	1089	2730	10	1.06	51.4	792.593	40.3	10.1418	6.20213
Continental AG	DE004	Germany	2003	-0.7	24338.8	433.8	1.042	0.124	418.3	0.5	0.136	1013.3	1149	10	1.24	56.1	702.975	35.9	10.0998	6.07258
Continental AG	DE004	Germany	2004	1.2	30350.1	557.9	1.101	0.131	523.2	0.6	0.131	1200.6	1047	10	1.31	54.4	854.289	42.1	10.3206	6.32418
Continental AG	DE004	Germany	2005	0.7	29749.8	535.1	1.132	0.154	456.3	0.7	0.168	1289	2560	10	1.54	55.6	732.387	38.1	10.3006	6.28245
Continental AG	DE004	Germany	2006	3.7	36885.2	694.6	1.127	0.13	528.5	0.7	0.112	1733	5838	10	1.3	53.1	1009.77	42.9	10.5156	6.54334
Continental AG	DE004	Germany	2007	3.3	38050	734.6	1.193	0.213	803.3	1.2	0.213	1431.8	1384	10	2.13	51.8	1033.68	34	10.5467	6.59933
Continental AG	DE004	Germany	2008	1.1	33479.9	595.7	1.141	0.219	579.6	1	0.209	1284.4	2771	10	2.19	56.2	930.708	34.4	10.4187	6.38974
Continental AG	DE004	Germany	2009	-5.7	22973.5	453.1	1.208	0.248	394	1.4	0.223	1110.2	3653	10	2.48	50.7	654.957	41.1	10.0421	6.11611
Continental AG	DE004	Germany	2010	4.2	47508.5	836.4	1.238	0.257	848.1	1.4	0.229	2286	7141	10	2.57	56.8	1302.79	39.6	10.7687	6.72911
Continental AG	DE004	Germany	2011	3.9	50584.9	1060.5	1.221	0.286	1028.6	1.6	0.302	1885.7	5540	10	2.86	47.7	1534.2	44	10.8314	6.9665
Continental AG	DE004	Germany	2012	0.4	38170.7	735.5	1.354	0.351	837.4	1.8	0.36	1608.2	4995	10	3.51	51.9	1088.27	37	10.5498	6.60055
Continental AG	DE004	Germany	2013	0.4	43233.9	820.4	1.274	0.327	880.7	1.4	0.36	1729.1	4147	10	3.27	52.7	1293.42	55.3	10.6744	6.70979
Continental AG	DE004	Germany	2014	1.9	51606.5	959.2	1.364	0.387	1501.7	2.2	0.429	2127.3	3924	10	3.87	53.8	1444.38	51.9	10.8514	6.8661
Continental AG	DE004	Germany	2015	1.5	52081.2	921.8	1.376	0.394	1228.9	2.3	0.335	2533.2	6147	10	3.94	56.5	1467.3	45.5	10.8606	6.82633
Continental AG	DE004	Germany	2016	2.2	55653	995.6	1.331	0.433	1664.5	1.9	0.375	2284.6	3080	10	4.33	55.9	1632.3	52.4	10.9269	6.90335
Continental AG	DE004	Germany	2017	2.5	57159.8	1028.1	1.39	0.444	1700	1.9	0.434	2144.6	5191	10	4.44	55.6	1565.47	55.3	10.9536	6.93547
Continental AG	DE004	Germany	2018	1.5	53054.4	944	1.447	0.468	1586.9	2.4	0.517	2612.5	8487	10	4.68	56.2	1482.37	52.6	10.8791	6.85013
Continental AG	DE004	Germany	2019	0.6	50374.3	912.6	1.447	0.529	1411.9	3.2	0.502	2279.4	7607	10	5.29	55.2	1316.73	41.5	10.8272	6.8163
Continental AG	DE004	Germany	2020	-4.1	30344	638.8	1.454	0.56	958.2	2.5	0.479	1493.9	4414	10	5.6	47.5	886.916	54	10.3204	6.45959
Continental AG	DE004	Germany	2021	2.6	73981.6	1375.1	1.519	0.614	2203.9	3.4	0.574	2966.5	4642	10	6.14	53.8	1968.11	43.5	11.2116	7.22628
Continental AG	DE004	Germany	2022	1.8	72199.7	1461.5	1.524	0.616	2840.8	2.5	0.601	3548.3	5279	10	6.16	49.4	2220.28	61.7	11.1872	7.28722
Continental AG	DE004	Germany	2023	-0.3	57035.4	1090.5	1.485	0.643	2064.7	3.4	0.63	2728.3	3205	10	6.43	52.3	1738.19	53.1	10.9514	6.99439
Continental AG	DE004	Germany	2024	-0.2	55813.1	1079.6	1.598	0.642	2283.6	3.8	0.566	2428.8	2980	10	6.42	51.7	1742.96	57.8	10.9298	6.98435
Continental AG	DE004	Germany	2025	0.5	63698.2	1104	1.563	0.682	2028.5	2.9	0.672	2510.8	5366	10	6.82	57.7	1613.57	56.6	11.0619	7.0067
ZF Friedrichshafen AG	DE005	Germany	2000	2.9	24271.3	498.4	0.979	0.018	230.8	0.1	0.017	1014.1	1522	10	0.18	48.7	807.737	35.3	10.097	6.2114
ZF Friedrichshafen AG	DE005	Germany	2001	1.5	23250	457.7	1.016	0.052	253.5	0.2	0.051	921.4	2080	10	0.52	50.8	640.045	37.3	10.0541	6.12621
ZF Friedrichshafen AG	DE005	Germany	2002	0	24506.6	544.6	1.048	0.083	358.5	0.5	0.083	1122.1	3585	10	0.83	45	783.4	45.2	10.1067	6.30005
ZF Friedrichshafen AG	DE005	Germany	2003	-0.7	24117.1	504.5	1.062	0.075	305.6	0.3	0.076	924.6	2047	10	0.75	47.8	788.49	36.9	10.0907	6.22357
ZF Friedrichshafen AG	DE005	Germany	2004	1.2	28135.6	621.1	1.089	0.136	386.7	0.6	0.136	1318.9	1678	10	1.36	45.3	952.466	29.6	10.2448	6.43149
ZF Friedrichshafen AG	DE005	Germany	2005	0.7	28589.9	563.9	1.112	0.093	436.1	0.5	0.084	1083.3	1990	10	0.93	50.7	857.282	38.6	10.2608	6.33488
ZF Friedrichshafen AG	DE005	Germany	2006	3.7	31810.6	654.5	1.131	0.127	525.3	0.7	0.127	1153.3	2182	10	1.27	48.6	920.298	42.5	10.3676	6.48387
ZF Friedrichshafen AG	DE005	Germany	2007	3.3	36031.9	723.5	1.168	0.195	612.6	0.8	0.173	1659.6	1341	10	1.95	49.8	993.03	36.6	10.4922	6.5841
ZF Friedrichshafen AG	DE005	Germany	2008	1.1	30672.7	686.2	1.204	0.167	454	0.9	0.154	1122.2	2885	10	1.67	44.7	947.306	42.5	10.3311	6.53117
ZF Friedrichshafen AG	DE005	Germany	2009	-5.7	22820.2	499.3	1.2	0.182	338.3	0.9	0.172	982.7	1319	10	1.82	45.7	696.085	44.2	10.0354	6.21321
ZF Friedrichshafen AG	DE005	Germany	2010	4.2	41919.2	942	1.19	0.227	683.2	0.9	0.228	1570.5	2260	10	2.27	44.5	1531.48	44.6	10.6435	6.84801
ZF Friedrichshafen AG	DE005	Germany	2011	3.9	41683.2	943.1	1.261	0.24	776.4	1	0.246	1568.6	1955	10	2.4	44.2	1304.15	32.5	10.6379	6.84917
ZF Friedrichshafen AG	DE005	Germany	2012	0.4	39125.1	867.5	1.27	0.233	666.8	1.1	0.223	1624.8	1872	10	2.33	45.1	1376.86	42.7	10.5745	6.76562
ZF Friedrichshafen AG	DE005	Germany	2013	0.4	37476.9	757.1	1.289	0.308	790.6	1.6	0.306	1352.8	4697	10	3.08	49.5	1041.35	41.9	10.5315	6.6295
ZF Friedrichshafen AG	DE005	Germany	2014	1.9	44781.1	861.2	1.319	0.318	1040.6	1.5	0.354	1642.3	4319	10	3.18	52	1168.91	48.1	10.7095	6.75833
ZF Friedrichshafen AG	DE005	Germany	2015	1.5	48284.1	909.3	1.304	0.392	1135	1.7	0.448	2059.3	4130	10	3.92	53.1	1346.12	48.2	10.7849	6.81268
ZF Friedrichshafen AG	DE005	Germany	2016	2.2	50877.7	1156.3	1.364	0.415	1237.7	1.9	0.41	1886.4	4434	10	4.15	44	1679.09	43.2	10.8372	7.05298
ZF Friedrichshafen AG	DE005	Germany	2017	2.5	52599.7	1000	1.413	0.438	1427.2	2.5	0.468	2196.4	4869	10	4.38	52.6	1548.03	50.8	10.8705	6.90776
ZF Friedrichshafen AG	DE005	Germany	2018	1.5	51051.2	1054.8	1.416	0.435	1526.5	2	0.449	2262.6	2112	10	4.35	48.4	1485.27	50.3	10.8406	6.96111
ZF Friedrichshafen AG	DE005	Germany	2019	0.6	45809.3	1024.8	1.451	0.497	1343.5	2.3	0.521	1640	1644	10	4.97	44.7	1531.86	50.1	10.7322	6.93225
ZF Friedrichshafen AG	DE005	Germany	2020	-4.1	28705	548.9	1.455	0.516	962.6	2.8	0.502	1180.4	995	10	5.16	52.3	898.26	47.9	10.2648	6.30792
ZF Friedrichshafen AG	DE005	Germany	2021	2.6	71618.9	1624	1.458	0.576	2315.9	2.8	0.542	2671.7	2763	10	5.76	44.1	2524.83	47.3	11.1791	7.39265
ZF Friedrichshafen AG	DE005	Germany	2022	1.8	62005.3	1342.1	1.492	0.646	2290.7	3	0.716	2425.2	6471	10	6.46	46.2	1910.3	53.5	11.035	7.20199
ZF Friedrichshafen AG	DE005	Germany	2023	-0.3	49825.4	969.4	1.495	0.654	1680.5	3.8	0.649	2274.7	3360	10	6.54	51.4	1444.05	51.2	10.8163	6.87668
ZF Friedrichshafen AG	DE005	Germany	2024	-0.2	56404.6	1215.6	1.523	0.692	1908	3.4	0.639	2065.4	3420	10	6.92	46.4	1724.16	44.1	10.9403	7.10299
ZF Friedrichshafen AG	DE005	Germany	2025	0.5	62310.2	1248.7	1.558	0.733	2242.9	3.9	0.792	2410.6	5389	10	7.33	49.9	1724.37	52.8	11.0399	7.12986
BASF SE	DE006	Germany	2000	2.9	24843.3	673.3	1.006	0.117	393.5	0.5	0.105	931.9	1312	10	1.17	36.9	1302.73	41	10.1203	6.51219
BASF SE	DE006	Germany	2001	1.5	24501.7	688.2	1.008	0.177	374.5	0.8	0.189	783.2	2608	10	1.77	35.6	1339.99	35.4	10.1065	6.53408
BASF SE	DE006	Germany	2002	0	25737.2	656.6	1.006	0.119	428.5	0.6	0.129	727.9	1446	10	1.19	39.2	1328.67	28.8	10.1557	6.48708
BASF SE	DE006	Germany	2003	-0.7	24128.8	607.8	1.031	0.102	337.1	0.5	0.089	702.3	1348	10	1.02	39.7	1169.32	36.8	10.0912	6.40985
BASF SE	DE006	Germany	2004	1.2	27427.8	721.8	1.093	0.174	475.3	0.9	0.183	910.8	1361	10	1.74	38	1372.54	33.3	10.2193	6.58175
BASF SE	DE006	Germany	2005	0.7	29718	798.9	1.059	0.179	434.1	0.8	0.165	859.7	1703	10	1.79	37.2	1479.94	34.6	10.2995	6.68324
BASF SE	DE006	Germany	2006	3.7	37235.8	1028.6	1.06	0.196	638.1	0.8	0.186	1177.6	3347	10	1.96	36.2	2073.2	42.1	10.525	6.93595
BASF SE	DE006	Germany	2007	3.3	36531	904.2	1.134	0.176	664.7	0.8	0.15	1247.4	2159	10	1.76	40.4	1700.3	39.7	10.5059	6.80705
BASF SE	DE006	Germany	2008	1.1	34277.7	883.4	1.136	0.223	559.5	1.3	0.229	1209.2	3114	10	2.23	38.8	1767.79	38.7	10.4423	6.78378
BASF SE	DE006	Germany	2009	-5.7	23333	622.2	1.198	0.305	569.1	1.4	0.323	863.8	2001	10	3.05	37.5	1259.81	37.8	10.0576	6.43326
BASF SE	DE006	Germany	2010	4.2	43111.2	1111.1	1.207	0.297	1073.4	1.3	0.284	1548.1	5116	10	2.97	38.8	2049.75	39.2	10.6715	7.01311
BASF SE	DE006	Germany	2011	3.9	44777.6	1233.5	1.244	0.322	1033.9	1.4	0.336	1604.6	4732	10	3.22	36.3	2559.6	51.9	10.7095	7.11761
BASF SE	DE006	Germany	2012	0.4	38702.8	1072.1	1.236	0.32	977.8	1.4	0.365	1411.7	2511	10	3.2	36.1	1982.46	43	10.5637	6.97737
BASF SE	DE006	Germany	2013	0.4	38078.2	1078.7	1.216	0.378	1054	2.1	0.355	1267.4	2006	10	3.78	35.3	1946.88	36.6	10.5474	6.98351
BASF SE	DE006	Germany	2014	1.9	47533.2	1389.9	1.287	0.386	1340.8	1.8	0.343	1659.9	4540	10	3.86	34.2	2430.11	45.8	10.7692	7.23699
BASF SE	DE006	Germany	2015	1.5	49959.3	1343	1.298	0.435	1455.5	2	0.455	1545.5	3913	10	4.35	37.2	2567.84	41.7	10.819	7.20266
BASF SE	DE006	Germany	2016	2.2	48788.2	1362.8	1.273	0.443	1330.1	2.3	0.424	1367.1	3043	10	4.43	35.8	2355.3	44.7	10.7952	7.2173
BASF SE	DE006	Germany	2017	2.5	56647.3	1514.6	1.282	0.465	1810.7	2.4	0.41	1608.6	4864	10	4.65	37.4	3024.24	47.8	10.9446	7.32291
BASF SE	DE006	Germany	2018	1.5	58481.1	1745.7	1.323	0.503	1667.7	2.9	0.473	2014.1	6582	10	5.03	33.5	3533.26	48.5	10.9765	7.46491
BASF SE	DE006	Germany	2019	0.6	50883.6	1509.9	1.369	0.478	1415.7	2.6	0.521	1780.4	1845	10	4.78	33.7	2931.63	28.3	10.8373	7.3198
BASF SE	DE006	Germany	2020	-4.1	29465.3	785.7	1.393	0.572	1064.8	2.4	0.616	879.7	1536	10	5.72	37.5	1498.69	52.6	10.291	6.66658
BASF SE	DE006	Germany	2021	2.6	72968.4	2115	1.383	0.601	2773.9	3.5	0.55	2622.7	6215	10	6.01	34.5	4058.31	46.8	11.1978	7.65681
BASF SE	DE006	Germany	2022	1.8	66075.1	1725.2	1.419	0.576	2178.2	2.4	0.535	1859.4	5389	10	5.76	38.3	3051.68	55.9	11.0985	7.4531
BASF SE	DE006	Germany	2023	-0.3	55713.8	1432.2	1.463	0.652	2159	3	0.664	1722.3	2537	10	6.52	38.9	2506.15	45.7	10.928	7.26697
BASF SE	DE006	Germany	2024	-0.2	54392	1438.9	1.447	0.69	1833.8	3.4	0.651	1540.9	3460	10	6.9	37.8	2650.35	55.9	10.904	7.27163
BASF SE	DE006	Germany	2025	0.5	68333.4	1721.2	1.504	0.75	2994.8	3.7	0.664	2480.6	7075	10	7.5	39.7	3564.72	54.9	11.1322	7.45078
Bayer AG	DE007	Germany	2000	2.9	34228.5	796	0.996	0.064	393.8	0.3	0.063	2845.5	6134	10	0.64	43	1543.51	40.9	10.4408	6.6796
Bayer AG	DE007	Germany	2001	1.5	33121.5	657.2	1.037	0.051	413.8	0.2	0.044	2953.7	4288	10	0.51	50.4	1482.19	36.7	10.4079	6.48799
Bayer AG	DE007	Germany	2002	0	33804.5	713.2	1.044	0.08	481.4	0.4	0.071	2857.1	4175	10	0.8	47.4	1476.59	36.2	10.4283	6.56976
Bayer AG	DE007	Germany	2003	-0.7	32879.3	732.3	1.072	0.049	367.6	0.2	0.043	3001.8	9627	10	0.49	44.9	1413.49	22.5	10.4006	6.59619
Bayer AG	DE007	Germany	2004	1.2	37240.3	766.3	1.058	0.121	492.3	0.5	0.12	3327.8	7683	10	1.21	48.6	1460.05	37.9	10.5251	6.64157
Bayer AG	DE007	Germany	2005	0.7	38057.2	881	1.078	0.172	629.6	1	0.171	3469.8	8772	10	1.72	43.2	1737.34	26	10.5468	6.78106
Bayer AG	DE007	Germany	2006	3.7	45784.8	1062.3	1.138	0.108	714.9	0.4	0.093	4285.4	12105	10	1.08	43.1	2298.13	36.3	10.7317	6.96819
Bayer AG	DE007	Germany	2007	3.3	49666.9	977.7	1.132	0.158	895.3	0.7	0.168	4715.5	9994	10	1.58	50.8	1901.91	37.4	10.8131	6.8852
Bayer AG	DE007	Germany	2008	1.1	44563.9	887.7	1.195	0.207	870.1	1	0.219	4513.4	9800	10	2.07	50.2	1837.17	50	10.7047	6.78863
Bayer AG	DE007	Germany	2009	-5.7	31694.2	635.2	1.218	0.203	510.3	1.2	0.185	2540.8	5852	10	2.03	49.9	1279.43	42.3	10.3639	6.45394
Bayer AG	DE007	Germany	2010	4.2	59107	1226.3	1.215	0.22	952	0.9	0.213	5107.7	11076	10	2.2	48.2	2592.86	40.2	10.9871	7.11176
Bayer AG	DE007	Germany	2011	3.9	65926	1359.3	1.206	0.244	1211.5	1.2	0.27	6015.1	6680	10	2.44	48.5	2849.29	48.7	11.0963	7.21473
Bayer AG	DE007	Germany	2012	0.4	49401.8	1179	1.234	0.299	1028.6	1.5	0.333	3950.9	5074	10	2.99	41.9	2357.64	35.7	10.8077	7.07242
Bayer AG	DE007	Germany	2013	0.4	51425.9	1118	1.259	0.302	1269.1	1.4	0.34	5099.1	7387	10	3.02	46	2152.19	56	10.8479	7.0193
Bayer AG	DE007	Germany	2014	1.9	64984.8	1359.5	1.272	0.322	1692	1.8	0.332	5833.8	8670	10	3.22	47.8	2855.96	43	11.0819	7.21487
Bayer AG	DE007	Germany	2015	1.5	64106.6	1450.4	1.302	0.366	1746.2	1.6	0.34	5874.1	7896	10	3.66	44.2	3268.74	55.6	11.0683	7.27959
Bayer AG	DE007	Germany	2016	2.2	67902.7	1519.1	1.305	0.407	1718.6	2.1	0.463	6463.5	19240	10	4.07	44.7	3271.87	56.4	11.1258	7.32587
Bayer AG	DE007	Germany	2017	2.5	76268.5	1622.7	1.338	0.468	2161.7	2.1	0.446	6733.8	14371	10	4.68	47	3628.89	54	11.242	7.39185
Bayer AG	DE007	Germany	2018	1.5	73278.5	1650.4	1.355	0.505	2409.6	2.1	0.577	5585.3	5898	10	5.05	44.4	3409.31	40.7	11.202	7.40877
Bayer AG	DE007	Germany	2019	0.6	72053	1452.7	1.439	0.512	2172.9	3	0.515	6667.9	6429	10	5.12	49.6	3106.2	54.6	11.1852	7.28118
Bayer AG	DE007	Germany	2020	-4.1	43692.1	891.7	1.459	0.534	1282.1	2.5	0.471	4417.7	9377	10	5.34	49	1837.78	54.7	10.6849	6.79313
Bayer AG	DE007	Germany	2021	2.6	92021.9	1941.4	1.399	0.589	2968.7	3.2	0.573	9228.6	9506	10	5.89	47.4	4399.64	49.8	11.4298	7.57116
Bayer AG	DE007	Germany	2022	1.8	90126.5	1784.7	1.413	0.609	3210.4	2.8	0.529	7719.4	17161	10	6.09	50.5	3454.54	50.4	11.409	7.48701
Bayer AG	DE007	Germany	2023	-0.3	77864.8	1674.5	1.439	0.635	3149	2.8	0.677	6482.8	17582	10	6.35	46.5	3361.95	56.4	11.2627	7.42327
Bayer AG	DE007	Germany	2024	-0.2	80324.5	1701.8	1.484	0.67	3042.5	3.4	0.725	7797.6	21084	10	6.7	47.2	3609.52	56	11.2938	7.43944
Bayer AG	DE007	Germany	2025	0.5	93135.8	1855.3	1.466	0.692	3039.6	2.8	0.698	7145.9	6236	10	6.92	50.2	4079.19	53.8	11.4418	7.5258
Covestro AG	DE008	Germany	2000	2.9	20913.5	713.8	0.974	0.136	323.9	0.6	0.156	655.4	1243	10	1.36	29.3	1420.86	27.8	9.94815	6.5706
Covestro AG	DE008	Germany	2001	1.5	20887.2	612.5	1.011	0.172	328.4	0.8	0.163	607	870	10	1.72	34.1	1100.43	30.7	9.94689	6.41755
Covestro AG	DE008	Germany	2002	0	21133.1	699.8	1.069	0.174	335.9	1	0.164	609.1	1600	10	1.74	30.2	1337.9	38.4	9.9586	6.55079
Covestro AG	DE008	Germany	2003	-0.7	22668.4	676.7	1.031	0.108	319.7	0.6	0.118	702.4	1956	10	1.08	33.5	1300.71	45.4	10.0287	6.51723
Covestro AG	DE008	Germany	2004	1.2	22599.9	708.5	1.033	0.184	415	0.9	0.175	716.4	1567	10	1.84	31.9	1255.34	34.2	10.0257	6.56315
Covestro AG	DE008	Germany	2005	0.7	26264.1	869.7	1.097	0.209	500.4	1	0.231	729.9	2134	10	2.09	30.2	1496.03	30	10.176	6.76815
Covestro AG	DE008	Germany	2006	3.7	29348	848.2	1.061	0.221	587.7	1.2	0.214	1013.5	3310	10	2.21	34.6	1457.66	44	10.287	6.74312
Covestro AG	DE008	Germany	2007	3.3	29653	1015.5	1.13	0.2	518.1	1	0.189	877.3	2905	10	2	29.2	1991.1	40.7	10.2973	6.92314
Covestro AG	DE008	Germany	2008	1.1	29380.7	1009.6	1.117	0.228	499.4	0.9	0.205	940.1	1968	10	2.28	29.1	1777.19	42.2	10.2881	6.91731
Covestro AG	DE008	Germany	2009	-5.7	19367.6	620.8	1.128	0.236	334.5	1	0.216	560	1959	10	2.36	31.2	1080.18	38.1	9.87136	6.43101
Covestro AG	DE008	Germany	2010	4.2	37322.9	1177.4	1.194	0.218	750.8	1	0.25	973.1	1919	10	2.18	31.7	2279.52	48.5	10.5274	7.07106
Covestro AG	DE008	Germany	2011	3.9	41892.1	1235.8	1.182	0.278	992.6	1.6	0.237	1265.5	2335	10	2.78	33.9	2309.61	42.5	10.6429	7.11947
Covestro AG	DE008	Germany	2012	0.4	31169.6	1008.7	1.193	0.296	617.1	1.4	0.299	826.9	2220	10	2.96	30.9	2108.23	45.5	10.3472	6.91642
Covestro AG	DE008	Germany	2013	0.4	32939.1	1135.8	1.179	0.354	740.4	2.1	0.342	858	2734	10	3.54	29	2107.56	52.3	10.4024	7.03509
Covestro AG	DE008	Germany	2014	1.9	38315	1101	1.236	0.377	824.9	1.5	0.362	1346.1	3322	10	3.77	34.8	1898.05	39.2	10.5536	7.00397
Covestro AG	DE008	Germany	2015	1.5	44745.9	1297	1.252	0.403	1277.1	1.8	0.425	1185.3	3981	10	4.03	34.5	2660.09	39.8	10.7088	7.16781
Covestro AG	DE008	Germany	2016	2.2	46765.7	1601.6	1.187	0.395	1216.8	1.6	0.361	1495.6	4972	10	3.95	29.2	3295.53	53	10.7529	7.37876
Covestro AG	DE008	Germany	2017	2.5	51405.9	1778.8	1.213	0.45	1237.2	2.2	0.438	1411.1	3141	10	4.5	28.9	3699.28	39.6	10.8475	7.48369
Covestro AG	DE008	Germany	2018	1.5	45691.7	1570.2	1.284	0.489	1391.2	2.1	0.512	1225.7	2438	10	4.89	29.1	3180.73	65	10.7297	7.35896
Covestro AG	DE008	Germany	2019	0.6	43247.4	1395.1	1.312	0.524	1430.3	2.5	0.599	1203.2	3800	10	5.24	31	2867.47	50.1	10.6747	7.24072
Covestro AG	DE008	Germany	2020	-4.1	26414.3	846.6	1.327	0.539	764.3	2.9	0.584	820.5	1361	10	5.39	31.2	1580.39	56.9	10.1817	6.74123
Covestro AG	DE008	Germany	2021	2.6	65048.2	1953.4	1.346	0.603	2285.9	2.5	0.563	1978.6	2978	10	6.03	33.3	3407.21	44.2	11.0829	7.57733
Covestro AG	DE008	Germany	2022	1.8	60493.1	1733.3	1.398	0.638	1865	3	0.599	1784.5	4587	10	6.38	34.9	3018.99	53.8	11.0103	7.45778
Covestro AG	DE008	Germany	2023	-0.3	50755.6	1475.5	1.361	0.649	1996.9	3.3	0.716	1351.4	1703	10	6.49	34.4	2602.07	56.6	10.8348	7.29675
Covestro AG	DE008	Germany	2024	-0.2	49876.9	1608.9	1.385	0.684	1970.2	3.7	0.614	1536.1	1287	10	6.84	31	3126.64	57	10.8173	7.38331
Covestro AG	DE008	Germany	2025	0.5	59975	1940.9	1.427	0.688	2518.8	3.1	0.59	1954.2	5134	10	6.88	30.9	3732.9	48.1	11.0017	7.57091
Evonik Industries AG	DE009	Germany	2000	2.9	30564.6	766	0.969	0.116	403.2	0.6	0.128	1065.1	3012	10	1.16	39.9	1482.16	34	10.3276	6.64118
Evonik Industries AG	DE009	Germany	2001	1.5	31490.2	751.6	1.05	0.137	557.4	0.8	0.125	1121	1205	10	1.37	41.9	1403.09	32.9	10.3574	6.6222
Evonik Industries AG	DE009	Germany	2002	0	29292	689.2	1.043	0.138	465.8	0.6	0.134	1029	2763	10	1.38	42.5	1185.41	39.5	10.2851	6.53553
Evonik Industries AG	DE009	Germany	2003	-0.7	29837.9	632.2	1.087	0.119	456.8	0.7	0.132	1036	2708	10	1.19	47.2	1162.19	36.7	10.3035	6.44921
Evonik Industries AG	DE009	Germany	2004	1.2	34430.9	797	1.07	0.191	537	1.1	0.214	1150	2761	10	1.91	43.2	1591.65	31.2	10.4467	6.68085
Evonik Industries AG	DE009	Germany	2005	0.7	34119.5	808.5	1.119	0.163	518.1	0.7	0.184	1065.9	3609	10	1.63	42.2	1632.03	41.6	10.4376	6.69518
Evonik Industries AG	DE009	Germany	2006	3.7	43229.5	915.9	1.148	0.211	852.4	1	0.21	1755	2927	10	2.11	47.2	1652.99	41.9	10.6743	6.81991
Evonik Industries AG	DE009	Germany	2007	3.3	46851.4	1016.3	1.193	0.154	800.7	0.8	0.148	1898.6	5980	10	1.54	46.1	1898.16	34.6	10.7547	6.92392
Evonik Industries AG	DE009	Germany	2008	1.1	41187.2	949	1.222	0.244	894.9	1.2	0.253	1494.1	4406	10	2.44	43.4	1833.63	44.2	10.6259	6.85541
Evonik Industries AG	DE009	Germany	2009	-5.7	28872.9	623.6	1.206	0.248	507.6	1.1	0.224	1023.1	2756	10	2.48	46.3	1196.4	41.4	10.2707	6.43551
Evonik Industries AG	DE009	Germany	2010	4.2	55839.1	1372	1.234	0.287	1120.3	1.6	0.3	1713.5	1487	10	2.87	40.7	2701.11	45	10.9302	7.22402
Evonik Industries AG	DE009	Germany	2011	3.9	55052.2	1336.2	1.266	0.286	1235.5	1.5	0.322	1995.3	3540	10	2.86	41.2	2630.24	43	10.916	7.19759
Evonik Industries AG	DE009	Germany	2012	0.4	43911.6	1053	1.276	0.306	876.8	1.8	0.311	1613.7	2337	10	3.06	41.7	2136.09	46.9	10.6899	6.9594
Evonik Industries AG	DE009	Germany	2013	0.4	46060.5	990.5	1.275	0.365	1214.4	1.6	0.322	1579.6	3414	10	3.65	46.5	1850.2	44.3	10.7377	6.89821
Evonik Industries AG	DE009	Germany	2014	1.9	59405.9	1242.8	1.327	0.356	1570.7	1.7	0.404	2160.7	1739	10	3.56	47.8	2240.34	43.6	10.9921	7.12512
Evonik Industries AG	DE009	Germany	2015	1.5	60944.4	1333.6	1.34	0.403	1701.4	2.1	0.351	2260.5	3005	10	4.03	45.7	2488.44	52.8	11.0177	7.19564
Evonik Industries AG	DE009	Germany	2016	2.2	66386.9	1554.7	1.358	0.435	1722	2.6	0.498	2226.9	3456	10	4.35	42.7	2667.13	42.9	11.1033	7.34904
Evonik Industries AG	DE009	Germany	2017	2.5	65172.3	1372	1.368	0.463	2040.1	2.3	0.439	2073.8	3206	10	4.63	47.5	2750.89	48.7	11.0848	7.22402
Evonik Industries AG	DE009	Germany	2018	1.5	67449.4	1456.8	1.388	0.465	1712.5	2.2	0.426	2635.8	6660	10	4.65	46.3	2522.18	49.9	11.1191	7.284
Evonik Industries AG	DE009	Germany	2019	0.6	63894.4	1566	1.388	0.545	2327.2	2.8	0.476	2505.9	7866	10	5.45	40.8	2838.6	54.8	11.065	7.35628
Evonik Industries AG	DE009	Germany	2020	-4.1	39117.8	944.9	1.456	0.544	1064.8	3	0.611	1561.8	4591	10	5.44	41.4	1828.52	51.1	10.5743	6.85108
Evonik Industries AG	DE009	Germany	2021	2.6	83389.6	1812.8	1.494	0.59	2883.3	3.3	0.606	2717.7	8646	10	5.9	46	3368.65	52.9	11.3313	7.50263
Evonik Industries AG	DE009	Germany	2022	1.8	84410.9	2038.9	1.521	0.612	2910.2	2.6	0.529	2941.8	3304	10	6.12	41.4	4086.22	60.1	11.3435	7.62017
Evonik Industries AG	DE009	Germany	2023	-0.3	67123.2	1605.8	1.52	0.653	2311.4	3.2	0.647	2751.1	8214	10	6.53	41.8	3124.67	46.7	11.1143	7.38138
Evonik Industries AG	DE009	Germany	2024	-0.2	71103.1	1559.3	1.542	0.734	2846.8	3.5	0.661	2219.2	3561	10	7.34	45.6	2861.69	43.2	11.1719	7.35199
Evonik Industries AG	DE009	Germany	2025	0.5	85193.7	1801.1	1.617	0.758	3423.6	3.1	0.646	3425.6	5508	10	7.58	47.3	3203.5	48.2	11.3527	7.49615
Wacker Chemie AG	DE010	Germany	2000	2.9	31450.7	709.9	1.037	0.029	313	0.1	0.03	1185.1	3890	10	0.29	44.3	1304.78	38.5	10.3562	6.56512
Wacker Chemie AG	DE010	Germany	2001	1.5	29909.4	624.4	1.02	0.065	358.3	0.3	0.062	1075.3	2782	10	0.65	47.9	1228.04	35.7	10.3059	6.43679
Wacker Chemie AG	DE010	Germany	2002	0	31257.1	694.6	1.018	0.095	440.1	0.5	0.105	1187.8	1854	10	0.95	45	1240.96	29.5	10.35	6.54334
Wacker Chemie AG	DE010	Germany	2003	-0.7	31481.9	737.3	1.08	0.144	557.8	0.7	0.127	1122.4	2753	10	1.44	42.7	1274.71	24.8	10.3572	6.60299
Wacker Chemie AG	DE010	Germany	2004	1.2	37526.6	795.1	1.098	0.133	533.3	0.7	0.119	1319.2	1159	10	1.33	47.2	1480.67	39.2	10.5328	6.67847
Wacker Chemie AG	DE010	Germany	2005	0.7	37706.7	764.8	1.083	0.124	613.6	0.6	0.139	1384.4	1215	10	1.24	49.3	1592.04	38	10.5376	6.63961
Wacker Chemie AG	DE010	Germany	2006	3.7	46106.2	931.4	1.128	0.148	816	0.6	0.159	1912.7	6434	10	1.48	49.5	1731.49	35.1	10.7387	6.83669
Wacker Chemie AG	DE010	Germany	2007	3.3	46210.7	1026.9	1.178	0.136	805.1	0.6	0.142	1616.7	4683	10	1.36	45	1795.57	34.6	10.741	6.9343
Wacker Chemie AG	DE010	Germany	2008	1.1	41931.2	942.3	1.196	0.205	780.8	1	0.226	1454.8	5025	10	2.05	44.5	1846.42	41.2	10.6438	6.84832
Wacker Chemie AG	DE010	Germany	2009	-5.7	29737.6	688.4	1.198	0.255	677.8	1.3	0.256	999.1	2799	10	2.55	43.2	1359.49	44.5	10.3002	6.53437
Wacker Chemie AG	DE010	Germany	2010	4.2	54837.4	1171.7	1.215	0.239	922.8	1.2	0.218	1839.4	4380	10	2.39	46.8	2156.06	38.2	10.9121	7.06621
Wacker Chemie AG	DE010	Germany	2011	3.9	59759.1	1250.2	1.263	0.23	1310.3	1.3	0.197	2017.4	5265	10	2.3	47.8	2255.35	44.7	10.9981	7.13106
Wacker Chemie AG	DE010	Germany	2012	0.4	49332.2	978.8	1.3	0.272	908.9	1.6	0.249	1643.8	4524	10	2.72	50.4	1912.97	39.8	10.8063	6.88633
Wacker Chemie AG	DE010	Germany	2013	0.4	52456.8	1189.5	1.287	0.347	1198.1	2	0.319	1799.4	4716	10	3.47	44.1	2072.82	46.3	10.8677	7.08129
Wacker Chemie AG	DE010	Germany	2014	1.9	59690.1	1215.7	1.343	0.351	1528.8	1.4	0.357	2409.6	7195	10	3.51	49.1	2105.31	46.9	10.9969	7.10308
Wacker Chemie AG	DE010	Germany	2015	1.5	59239.7	1279.5	1.342	0.367	1520.4	1.6	0.318	2473.1	6940	10	3.67	46.3	2282.83	60.4	10.9893	7.15422
Wacker Chemie AG	DE010	Germany	2016	2.2	63189	1385.7	1.36	0.394	1463.2	2.1	0.436	2159.8	6595	10	3.94	45.6	2446.48	42	11.0539	7.23396
Wacker Chemie AG	DE010	Germany	2017	2.5	76560.3	1836	1.38	0.414	1841.7	2.3	0.359	2491.2	8570	10	4.14	41.7	3539.51	41.4	11.2458	7.51534
Wacker Chemie AG	DE010	Germany	2018	1.5	68914.4	1460.1	1.426	0.474	1875.1	2.3	0.544	2542.9	4669	10	4.74	47.2	2501.1	58.5	11.1406	7.28626
Wacker Chemie AG	DE010	Germany	2019	0.6	66591.3	1503.2	1.421	0.499	1746.7	2.4	0.536	2680.7	3454	10	4.99	44.3	2614.15	47.1	11.1063	7.31535
Wacker Chemie AG	DE010	Germany	2020	-4.1	37638.2	784.1	1.478	0.508	1120.9	2.8	0.479	1342.8	4280	10	5.08	48	1426.3	45.8	10.5358	6.66454
Wacker Chemie AG	DE010	Germany	2021	2.6	96021	2021.5	1.485	0.581	2747.6	2.6	0.616	3532.5	4286	10	5.81	47.5	4110.11	53.3	11.4723	7.6116
Wacker Chemie AG	DE010	Germany	2022	1.8	82339.7	1884.2	1.489	0.605	2879.2	3	0.516	2779.4	3740	10	6.05	43.7	3475.06	40.9	11.3186	7.54126
Wacker Chemie AG	DE010	Germany	2023	-0.3	67496.5	1607.1	1.545	0.672	2495.7	2.8	0.708	2636.4	8537	10	6.72	42	2814	50.5	11.1198	7.38219
Wacker Chemie AG	DE010	Germany	2024	-0.2	71212.7	1660	1.551	0.755	2587.6	3.8	0.805	2309.3	2632	10	7.55	42.9	2923.28	54.4	11.1734	7.41457
Wacker Chemie AG	DE010	Germany	2025	0.5	83485.6	1732.1	1.59	0.726	3728	3.2	0.687	3340.3	5066	10	7.26	48.2	3165.44	52.6	11.3324	7.45709
Siemens AG	DE011	Germany	2000	2.9	29186.9	750.3	0.989	0.038	329	0.2	0.04	998.7	2783	10	0.38	38.9	1388.25	31.6	10.2815	6.62047
Siemens AG	DE011	Germany	2001	1.5	29301.6	652.6	0.994	0.034	363.7	0.2	0.037	1087.4	976	10	0.34	44.9	1036.02	30.7	10.2854	6.48096
Siemens AG	DE011	Germany	2002	0	31457.5	723.2	1.059	0.036	319.6	0.2	0.034	1229.1	2831	10	0.36	43.5	1186.62	33.7	10.3564	6.58369
Siemens AG	DE011	Germany	2003	-0.7	27934.4	669.9	1.04	0.061	353.8	0.3	0.062	935.1	2988	10	0.61	41.7	1133.37	40.2	10.2376	6.50713
Siemens AG	DE011	Germany	2004	1.2	31500.8	734.3	1.056	0.085	461.2	0.5	0.092	1068	881	10	0.85	42.9	1184.15	36.8	10.3578	6.59892
Siemens AG	DE011	Germany	2005	0.7	35289.6	777.3	1.066	0.081	422	0.4	0.079	1207.9	1088	10	0.81	45.4	1384.32	38.1	10.4713	6.65583
Siemens AG	DE011	Germany	2006	3.7	42664.1	1048.3	1.053	0.103	536.3	0.6	0.102	1367.9	4382	10	1.03	40.7	1711.06	31.7	10.6611	6.95493
Siemens AG	DE011	Germany	2007	3.3	43798.1	1100.5	1.086	0.122	749.3	0.7	0.135	1588.2	2205	10	1.22	39.8	1912.29	41.3	10.6873	7.00352
Siemens AG	DE011	Germany	2008	1.1	40228.9	874.5	1.147	0.17	674.3	0.9	0.182	1441.8	1905	10	1.7	46	1567.6	44.4	10.6023	6.77365
Siemens AG	DE011	Germany	2009	-5.7	26947.7	588.4	1.122	0.203	443.4	1.1	0.229	1041.4	3440	10	2.03	45.8	1004.59	39.2	10.2017	6.37741
Siemens AG	DE011	Germany	2010	4.2	52458.7	1276.4	1.185	0.247	1077.6	1	0.256	1813.4	2939	10	2.47	41.1	1960.58	44.7	10.8678	7.1518
Siemens AG	DE011	Germany	2011	3.9	57622.5	1294.9	1.152	0.251	1050.7	1.2	0.233	1999.8	2663	10	2.51	44.5	2213.24	53.7	10.9617	7.16619
Siemens AG	DE011	Germany	2012	0.4	43977.2	968.7	1.161	0.294	1030.5	1.5	0.257	1403.7	1356	10	2.94	45.4	1778.61	48.6	10.6914	6.87595
Siemens AG	DE011	Germany	2013	0.4	48462.6	1119.2	1.2	0.303	989.4	1.7	0.311	1854.5	6088	10	3.03	43.3	1985.3	43.5	10.7885	7.02037
Siemens AG	DE011	Germany	2014	1.9	59147.9	1300	1.141	0.349	1421.1	1.7	0.342	2167.4	4240	10	3.49	45.5	2216.33	46.9	10.9878	7.17012
Siemens AG	DE011	Germany	2015	1.5	55148.2	1259.1	1.225	0.355	1329	1.7	0.398	1756.4	2818	10	3.55	43.8	2255.13	49	10.9178	7.13815
Siemens AG	DE011	Germany	2016	2.2	67681.8	1477.8	1.252	0.405	1749.9	2	0.36	2166.3	2333	10	4.05	45.8	2671.14	52.9	11.1226	7.29831
Siemens AG	DE011	Germany	2017	2.5	68976.3	1489.8	1.247	0.416	1820.9	2.2	0.463	2794.5	6387	10	4.16	46.3	2548.08	44.6	11.1415	7.3064
Siemens AG	DE011	Germany	2018	1.5	63207.4	1359.3	1.259	0.47	1800.4	2.2	0.455	2249.1	4816	10	4.7	46.5	2535.71	45.5	11.0542	7.21473
Siemens AG	DE011	Germany	2019	0.6	64032.4	1401.1	1.243	0.518	1760.3	2.4	0.578	2429	2842	10	5.18	45.7	2535.97	52.1	11.0671	7.24501
Siemens AG	DE011	Germany	2020	-4.1	34280.6	782.7	1.315	0.478	1066.1	2.2	0.457	1223.4	2997	10	4.78	43.8	1274.9	56	10.4423	6.66275
Siemens AG	DE011	Germany	2021	2.6	86188.1	2018.5	1.32	0.563	2912.8	3	0.593	2624.4	2464	10	5.63	42.7	3709.88	57.3	11.3643	7.61011
Siemens AG	DE011	Germany	2022	1.8	77311.1	1890.2	1.334	0.587	2791.2	2.4	0.517	2346.2	7004	10	5.87	40.9	3226.92	59.6	11.2556	7.54444
Siemens AG	DE011	Germany	2023	-0.3	65135.9	1588.7	1.3	0.694	2368.7	4.1	0.727	2280.3	3119	10	6.94	41	2529.07	58.2	11.0842	7.37067
Siemens AG	DE011	Germany	2024	-0.2	71443.3	1539.7	1.309	0.702	2491.9	3.6	0.718	2908.2	4367	10	7.02	46.4	2624.47	56.5	11.1767	7.33934
Siemens AG	DE011	Germany	2025	0.5	75063.8	1717.7	1.365	0.696	2854.7	3.3	0.62	2275.5	6897	10	6.96	43.7	2698.12	52.1	11.2261	7.44874
ThyssenKrupp AG	DE012	Germany	2000	2.9	27722.4	676.2	0.974	0.032	335.1	0.1	0.03	442	1425	10	0.32	41	967.624	44.3	10.23	6.51649
ThyssenKrupp AG	DE012	Germany	2001	1.5	25932.7	573.7	1.075	0.01	284.1	0	0.009	455.4	1117	10	0.1	45.2	833.181	30.4	10.1633	6.35211
ThyssenKrupp AG	DE012	Germany	2002	0	26984.3	572.9	1.014	0.061	309.6	0.3	0.055	427.8	680	10	0.61	47.1	829.172	22.2	10.203	6.35071
ThyssenKrupp AG	DE012	Germany	2003	-0.7	25746.6	572.1	1.062	0.091	391.6	0.5	0.099	456.5	1500	10	0.91	45	866.024	40.9	10.1561	6.34931
ThyssenKrupp AG	DE012	Germany	2004	1.2	29389.7	740.3	1.028	0.071	339.2	0.4	0.074	431.2	1377	10	0.71	39.7	1067.03	49.6	10.2884	6.60706
ThyssenKrupp AG	DE012	Germany	2005	0.7	30962.3	726.8	1.095	0.121	479.5	0.7	0.12	471.2	980	10	1.21	42.6	1118.06	28.6	10.3405	6.58865
ThyssenKrupp AG	DE012	Germany	2006	3.7	35348.7	897.2	1.094	0.173	524.8	0.9	0.173	650.5	1154	10	1.73	39.4	1177.05	39	10.473	6.79928
ThyssenKrupp AG	DE012	Germany	2007	3.3	39139	891.5	1.147	0.211	616.5	1.1	0.195	565	1718	10	2.11	43.9	1188.2	41.4	10.5749	6.79291
ThyssenKrupp AG	DE012	Germany	2008	1.1	34182.9	804.3	1.146	0.188	592.2	0.8	0.189	593.5	1954	10	1.88	42.5	1057.5	39.1	10.4395	6.68997
ThyssenKrupp AG	DE012	Germany	2009	-5.7	24482.3	597.1	1.142	0.195	429.8	1.1	0.191	418.3	521	10	1.95	41	860.854	38	10.1057	6.39208
ThyssenKrupp AG	DE012	Germany	2010	4.2	48614.9	1092.5	1.148	0.233	819.2	1.3	0.207	875.2	2707	10	2.33	44.5	1532.23	38.4	10.7917	6.99622
ThyssenKrupp AG	DE012	Germany	2011	3.9	50651.3	1302.1	1.153	0.255	979.6	1.4	0.275	937.7	2770	10	2.55	38.9	1913.94	41.8	10.8327	7.17173
ThyssenKrupp AG	DE012	Germany	2012	0.4	39439.9	908.8	1.196	0.247	874.8	1.1	0.246	613.1	1075	10	2.47	43.4	1188.35	43.1	10.5825	6.81213
ThyssenKrupp AG	DE012	Germany	2013	0.4	40425.7	988.4	1.163	0.307	881.2	1.7	0.294	691.5	761	10	3.07	40.9	1405.26	48.8	10.6072	6.89609
ThyssenKrupp AG	DE012	Germany	2014	1.9	47486.7	1019	1.22	0.362	1181.8	1.8	0.391	724.8	1407	10	3.62	46.6	1410.11	43.4	10.7682	6.92658
ThyssenKrupp AG	DE012	Germany	2015	1.5	48519.8	1228.3	1.227	0.372	1148.1	1.6	0.348	740.6	2549	10	3.72	39.5	1582.51	48.9	10.7897	7.11339
ThyssenKrupp AG	DE012	Germany	2016	2.2	57341.9	1368.5	1.246	0.377	1465.3	1.7	0.388	926.6	2545	10	3.77	41.9	1879.6	50.3	10.9568	7.22147
ThyssenKrupp AG	DE012	Germany	2017	2.5	57210.3	1241	1.284	0.421	1649	1.9	0.391	1037.4	1407	10	4.21	46.1	1704.16	49.2	10.9545	7.12367
ThyssenKrupp AG	DE012	Germany	2018	1.5	57875.9	1315.4	1.274	0.489	1813.6	2.1	0.542	927.5	2528	10	4.89	44	1922.12	48.2	10.9661	7.1819
ThyssenKrupp AG	DE012	Germany	2019	0.6	54741.2	1288	1.3	0.528	1749.6	2.9	0.451	778.5	1349	10	5.28	42.5	1864.93	52.1	10.9104	7.16085
ThyssenKrupp AG	DE012	Germany	2020	-4.1	31815.4	789.5	1.306	0.575	1104.8	3.1	0.594	529.8	1460	10	5.75	40.3	1033.62	51.5	10.3677	6.6714
ThyssenKrupp AG	DE012	Germany	2021	2.6	70513.8	1506.7	1.43	0.575	2351.2	2.8	0.572	1317.9	1905	10	5.75	46.8	2143.24	52.3	11.1636	7.31768
ThyssenKrupp AG	DE012	Germany	2022	1.8	67763.3	1728.7	1.334	0.625	2691.4	2.9	0.606	1018.8	1757	10	6.25	39.2	2511.38	45.6	11.1238	7.45512
ThyssenKrupp AG	DE012	Germany	2023	-0.3	55853.1	1252.3	1.347	0.659	2184	2.9	0.629	971.9	3105	10	6.59	44.6	1900.52	49.3	10.9305	7.13274
ThyssenKrupp AG	DE012	Germany	2024	-0.2	57810.7	1299.1	1.378	0.706	1997.1	3.9	0.652	887.4	2964	10	7.06	44.5	1947.87	54.4	10.9649	7.16943
ThyssenKrupp AG	DE012	Germany	2025	0.5	64978.9	1547.1	1.407	0.768	2739	3.9	0.734	1072.7	3625	10	7.68	42	2355.72	57.5	11.0818	7.34414
Robert Bosch GmbH	DE013	Germany	2000	2.9	78051.6	655.9	0.979	0.025	866.8	0.1	0.026	4652.8	10496	10	0.25	119	1134.29	35.9	11.2651	6.48601
Robert Bosch GmbH	DE013	Germany	2001	1.5	75425.9	630.7	1.031	0.023	945.9	0.1	0.026	5033.6	12568	10	0.23	119.6	973.764	32.9	11.2309	6.44683
Robert Bosch GmbH	DE013	Germany	2002	0	81018.4	757.9	1.027	0.01	758.4	0.1	0.009	5678	19838	10	0.1	106.9	1192.42	38.3	11.3024	6.63055
Robert Bosch GmbH	DE013	Germany	2003	-0.7	80563.6	761.5	1.047	0.069	1150.6	0.4	0.07	5169.9	6533	10	0.69	105.8	1190.19	36.4	11.2968	6.63529
Robert Bosch GmbH	DE013	Germany	2004	1.2	93745.4	786.5	1.151	0.073	1071.6	0.4	0.065	6241	19362	10	0.73	119.2	1216.17	39.8	11.4483	6.66759
Robert Bosch GmbH	DE013	Germany	2005	0.7	94020.2	777	1.105	0.102	1473.1	0.5	0.102	6628.2	18999	10	1.02	121	1204.26	41.6	11.4513	6.65544
Robert Bosch GmbH	DE013	Germany	2006	3.7	106865	935.8	1.138	0.09	1456.5	0.4	0.078	7481.9	19405	10	0.9	114.2	1618.4	30.9	11.5793	6.8414
Robert Bosch GmbH	DE013	Germany	2007	3.3	110839	1015	1.108	0.116	1704.7	0.6	0.11	6575.6	20241	10	1.16	109.2	1665.92	42.4	11.6158	6.92264
Robert Bosch GmbH	DE013	Germany	2008	1.1	103900	891.8	1.239	0.191	1788.7	0.8	0.171	6281.9	20943	10	1.91	116.5	1481.32	49.6	11.5512	6.79324
Robert Bosch GmbH	DE013	Germany	2009	-5.7	74901.6	600.7	1.216	0.203	1285.2	1	0.196	4009.6	3985	10	2.03	124.7	894.535	42.6	11.2239	6.3981
Robert Bosch GmbH	DE013	Germany	2010	4.2	139380	1098.3	1.213	0.209	2403.6	1	0.178	9524.5	10529	10	2.09	126.9	1821.79	43.2	11.845	7.00152
Robert Bosch GmbH	DE013	Germany	2011	3.9	143553	1187.4	1.262	0.245	3105.1	1.2	0.217	9490.2	13115	10	2.45	120.9	2017.6	43.8	11.8745	7.07952
Robert Bosch GmbH	DE013	Germany	2012	0.4	123339	1065.1	1.269	0.271	2363.3	1.2	0.29	8431.6	22281	10	2.71	115.8	1682.87	43.2	11.7227	6.97082
Robert Bosch GmbH	DE013	Germany	2013	0.4	125717	1156.5	1.274	0.336	2761.7	1.7	0.372	8578.7	11486	10	3.36	108.7	1721.89	45.4	11.7418	7.05315
Robert Bosch GmbH	DE013	Germany	2014	1.9	147904	1160	1.307	0.378	3835.1	1.8	0.369	9513	16068	10	3.78	127.5	2019.43	45.1	11.9043	7.05618
Robert Bosch GmbH	DE013	Germany	2015	1.5	146270	1227.1	1.306	0.402	3387.3	2.2	0.361	9766.5	23213	10	4.02	119.2	2125.13	42.2	11.8932	7.11241
Robert Bosch GmbH	DE013	Germany	2016	2.2	162188	1294.4	1.358	0.403	4567.8	1.7	0.423	9496.2	21900	10	4.03	125.3	2099.8	49.7	11.9965	7.1658
Robert Bosch GmbH	DE013	Germany	2017	2.5	177407	1645.7	1.378	0.421	4962.7	1.9	0.43	11093.1	24930	10	4.21	107.8	2492.61	44.1	12.0862	7.40592
Robert Bosch GmbH	DE013	Germany	2018	1.5	169774	1591.1	1.459	0.51	5414.3	2.5	0.533	11890.3	20545	10	5.1	106.7	2556.88	53.7	12.0422	7.37218
Robert Bosch GmbH	DE013	Germany	2019	0.6	159533	1291.8	1.415	0.5	4222.4	2.3	0.515	9356.2	7878	10	5	123.5	2189.98	53.6	11.98	7.16379
Robert Bosch GmbH	DE013	Germany	2020	-4.1	101061	847.1	1.466	0.538	2913.7	3.2	0.606	6002.5	20247	10	5.38	119.3	1272.33	48.6	11.5235	6.74182
Robert Bosch GmbH	DE013	Germany	2021	2.6	224903	1937.2	1.479	0.542	6439.9	2.7	0.53	11970.7	12076	10	5.42	116.1	2886.67	60.2	12.3234	7.569
Robert Bosch GmbH	DE013	Germany	2022	1.8	229544	2053.2	1.507	0.591	8530.5	2.7	0.544	14543.8	42670	10	5.91	111.8	3194.74	59.5	12.3439	7.62715
Robert Bosch GmbH	DE013	Germany	2023	-0.3	169364	1442.6	1.507	0.687	6604.2	2.8	0.6	9910.6	16572	10	6.87	117.4	2508.66	49.5	12.0398	7.2742
Robert Bosch GmbH	DE013	Germany	2024	-0.2	177653	1431.5	1.579	0.72	7372.3	3.7	0.656	9559.5	24937	10	7.2	124.1	2481.15	61.7	12.0876	7.26648
Robert Bosch GmbH	DE013	Germany	2025	0.5	213997	1827.5	1.593	0.711	8417.1	3.7	0.695	11941	31780	10	7.11	117.1	3100.95	51.2	12.2737	7.5107
Festo SE	DE014	Germany	2000	2.9	10642.6	519.2	1.035	0.066	153.1	0.4	0.068	664.5	968	10	0.66	20.5	865.02	40.4	9.27262	6.25229
Festo SE	DE014	Germany	2001	1.5	11177.5	501.2	1.033	0.109	150	0.6	0.109	745.1	2126	10	1.09	22.3	838.296	45.9	9.32166	6.21701
Festo SE	DE014	Germany	2002	0	10704.9	519.7	1.026	0.105	137.6	0.5	0.101	748.3	2213	10	1.05	20.6	865.578	35	9.27846	6.25325
Festo SE	DE014	Germany	2003	-0.7	11097.6	506.7	1.067	0.143	194.7	0.6	0.123	734.1	1039	10	1.43	21.9	848.507	39	9.31448	6.22792
Festo SE	DE014	Germany	2004	1.2	12500.4	586.9	1.105	0.133	212.8	0.8	0.113	808.1	2592	10	1.33	21.3	1007.75	35	9.43352	6.37485
Festo SE	DE014	Germany	2005	0.7	12218	584.6	1.095	0.139	204.3	0.6	0.123	767	2520	10	1.39	20.9	992.11	33.9	9.41067	6.37093
Festo SE	DE014	Germany	2006	3.7	14916.6	651.4	1.13	0.132	254.8	0.6	0.137	1145.4	1658	10	1.32	22.9	1093.99	36.5	9.61023	6.47912
Festo SE	DE014	Germany	2007	3.3	15032.5	656.4	1.138	0.186	268	1	0.159	913	785	10	1.86	22.9	1218.92	46	9.61797	6.48677
Festo SE	DE014	Germany	2008	1.1	14317.2	701.8	1.171	0.22	278.4	1.2	0.236	933.4	977	10	2.2	20.4	1355.94	39.3	9.56922	6.55365
Festo SE	DE014	Germany	2009	-5.7	9804.8	462.5	1.221	0.221	170.8	1.3	0.221	584	1084	10	2.21	21.2	900.33	46.8	9.19063	6.13665
Festo SE	DE014	Germany	2010	4.2	19433	916.7	1.227	0.265	394.5	1.2	0.303	1426.6	3061	10	2.65	21.2	1575.08	43.1	9.87473	6.82078
Festo SE	DE014	Germany	2011	3.9	21123.2	895.1	1.26	0.31	439.9	1.7	0.271	1253.3	2512	10	3.1	23.6	1569.22	52.8	9.95813	6.79694
Festo SE	DE014	Germany	2012	0.4	15832.3	719.6	1.244	0.292	323.4	1.5	0.269	1016.2	2872	10	2.92	22	1214.59	46.4	9.66981	6.5787
Festo SE	DE014	Germany	2013	0.4	16470.7	680.6	1.253	0.336	432.6	1.4	0.384	1027.6	1251	10	3.36	24.2	1251.02	50.6	9.70934	6.52297
Festo SE	DE014	Germany	2014	1.9	20435.8	1001.8	1.342	0.385	594.6	2.2	0.36	1481.7	3818	10	3.85	20.4	1775.1	48.6	9.92504	6.90955
Festo SE	DE014	Germany	2015	1.5	19800.4	818.2	1.305	0.395	446.7	2.4	0.337	1409	2291	10	3.95	24.2	1518.4	36.6	9.89346	6.70711
Festo SE	DE014	Germany	2016	2.2	22010.1	995.9	1.339	0.451	558.9	2.7	0.449	1384.3	3271	10	4.51	22.1	1695.87	46.1	9.99926	6.90365
Festo SE	DE014	Germany	2017	2.5	23130.4	1061	1.359	0.434	574.1	2	0.39	1370.8	3957	10	4.34	21.8	1994.73	49.1	10.0489	6.96697
Festo SE	DE014	Germany	2018	1.5	22712	1027.7	1.391	0.469	640.3	2.6	0.516	1576.7	4296	10	4.69	22.1	1752.69	48.3	10.0306	6.93508
Festo SE	DE014	Germany	2019	0.6	22489.6	982.1	1.442	0.54	688.3	2.8	0.544	1721.7	4730	10	5.4	22.9	1752.24	50.3	10.0208	6.88969
Festo SE	DE014	Germany	2020	-4.1	13187	580.9	1.443	0.582	385	3.1	0.616	1012.4	3297	10	5.82	22.7	1067.82	53.9	9.48699	6.36458
Festo SE	DE014	Germany	2021	2.6	31007.2	1360	1.472	0.582	953	2.9	0.58	2296.7	4643	10	5.82	22.8	2450.89	59.6	10.342	7.21524
Festo SE	DE014	Germany	2022	1.8	31014.2	1397	1.468	0.61	1129.6	2.6	0.687	2004.4	4629	10	6.1	22.2	2399.78	52.7	10.3422	7.24208
Festo SE	DE014	Germany	2023	-0.3	24686.7	1102.1	1.481	0.64	832.6	3.5	0.657	1563.9	4175	10	6.4	22.4	1811.66	63.3	10.114	7.00497
Festo SE	DE014	Germany	2024	-0.2	25294.2	1045.2	1.535	0.733	971.3	4	0.673	1569	5252	10	7.33	24.2	1929.96	54.3	10.1383	6.95196
Festo SE	DE014	Germany	2025	0.5	28916	1302.5	1.547	0.728	1244.1	4.2	0.833	1883.3	3427	10	7.28	22.2	2288.9	61.9	10.2722	7.17204
SAP SE	DE015	Germany	2000	2.9	26694.6	271.3	1.001	0.044	343.6	0.2	0.051	2913.1	2775	10	0.44	98.4	945.216	36.7	10.1922	5.60323
SAP SE	DE015	Germany	2001	1.5	28828	328.3	1.058	0.061	341.4	0.3	0.065	3668.6	9428	10	0.61	87.8	1192.91	33.5	10.2691	5.79393
SAP SE	DE015	Germany	2002	0	27402.1	303.8	1.041	0.089	368.9	0.4	0.086	3423.8	11590	10	0.89	90.2	1105.2	46	10.2184	5.71637
SAP SE	DE015	Germany	2003	-0.7	28602.5	287.2	1.055	0.144	483.1	0.8	0.144	3263.1	9460	10	1.44	99.6	1088.28	38.9	10.2612	5.66018
SAP SE	DE015	Germany	2004	1.2	30962.5	369	1.065	0.129	425.8	0.6	0.146	3756.2	12798	10	1.29	83.9	1202.69	40.1	10.3405	5.9108
SAP SE	DE015	Germany	2005	0.7	30684.7	316	1.117	0.169	467.5	0.8	0.192	3278.1	8021	10	1.69	97.1	1206.44	43.4	10.3315	5.75574
SAP SE	DE015	Germany	2006	3.7	39099	414.2	1.128	0.135	584.7	0.7	0.143	3949.6	9098	10	1.35	94.4	1327.02	41.3	10.5739	6.02635
SAP SE	DE015	Germany	2007	3.3	42167.2	470.1	1.139	0.171	621.5	0.9	0.182	4942.2	8146	10	1.71	89.7	1787.18	42.7	10.6494	6.15295
SAP SE	DE015	Germany	2008	1.1	36671.5	370	1.191	0.214	597.8	1.3	0.232	4219.1	6327	10	2.14	99.1	1277.68	52.5	10.5098	5.9135
SAP SE	DE015	Germany	2009	-5.7	23590.4	249.4	1.219	0.211	424.8	1	0.236	2481.4	8001	10	2.11	94.6	882.199	39.7	10.0686	5.51906
SAP SE	DE015	Germany	2010	4.2	47384.9	472.9	1.193	0.249	1002.5	1.2	0.263	5668.8	7807	10	2.49	100.2	1626.51	32.5	10.7661	6.15888
SAP SE	DE015	Germany	2011	3.9	48177.8	512	1.204	0.278	926	1.3	0.314	5977.2	5548	10	2.78	94.1	1707.23	44.1	10.7827	6.23832
SAP SE	DE015	Germany	2012	0.4	43786.3	439.6	1.261	0.356	1116	2	0.31	5090	12484	10	3.56	99.6	1470.52	40.4	10.6871	6.08587
SAP SE	DE015	Germany	2013	0.4	41963	415.9	1.242	0.359	1138.8	1.5	0.365	5169	12701	10	3.59	100.9	1479.73	44.3	10.6445	6.03044
SAP SE	DE015	Germany	2014	1.9	52453.5	603.6	1.245	0.354	1200.1	1.7	0.371	6761.3	19541	10	3.54	86.9	2315.28	52.7	10.8677	6.40291
SAP SE	DE015	Germany	2015	1.5	53525.9	607.6	1.281	0.406	1254.5	2.1	0.409	5969.1	8198	10	4.06	88.1	2226.92	44.2	10.8879	6.40952
SAP SE	DE015	Germany	2016	2.2	60574	667.1	1.313	0.444	1605.7	2	0.463	6030.8	8357	10	4.44	90.8	2492.06	38.9	11.0116	6.50294
SAP SE	DE015	Germany	2017	2.5	66821	694.6	1.317	0.49	1955.2	2.5	0.559	7593.4	20216	10	4.9	96.2	2471.81	47.9	11.1098	6.54334
SAP SE	DE015	Germany	2018	1.5	60384.9	695.7	1.382	0.431	1647.3	2	0.468	6728.6	22774	10	4.31	86.8	2450.5	43.7	11.0085	6.54492
SAP SE	DE015	Germany	2019	0.6	56921.5	647.6	1.397	0.532	1922.8	2.4	0.599	7109.6	22747	10	5.32	87.9	2404.11	49	10.9494	6.47327
SAP SE	DE015	Germany	2020	-4.1	30906.7	372.8	1.406	0.521	939.3	2.9	0.59	3757.7	11611	10	5.21	82.9	1332.68	50.6	10.3387	5.92104
SAP SE	DE015	Germany	2021	2.6	73649.2	842.7	1.454	0.57	2672.6	3	0.59	7427.1	8493	10	5.7	87.4	3017.64	41.4	11.2071	6.73661
SAP SE	DE015	Germany	2022	1.8	74464.8	760.6	1.511	0.598	2788	2.9	0.665	8067.4	14035	10	5.98	97.9	2441.17	59.3	11.2181	6.63411
SAP SE	DE015	Germany	2023	-0.3	57804	631.7	1.442	0.618	2205.9	2.6	0.693	6801	8715	10	6.18	91.5	2330.71	60.4	10.9648	6.44841
SAP SE	DE015	Germany	2024	-0.2	58678.6	610	1.509	0.657	2264.1	3.2	0.724	7049.3	23321	10	6.57	96.2	2021.71	51.6	10.9798	6.41346
SAP SE	DE015	Germany	2025	0.5	76056.5	827.6	1.548	0.739	2695.6	3.4	0.809	9477.4	30645	10	7.39	91.9	3103.43	56.7	11.2392	6.71853
Infineon Technologies AG	DE016	Germany	2000	2.9	10413	347.1	1.017	0.077	155.8	0.4	0.085	1237.2	1967	10	0.77	30	950.82	36.2	9.25081	5.84961
Infineon Technologies AG	DE016	Germany	2001	1.5	9999.3	317.4	1.064	0.079	132.7	0.4	0.082	1230.7	3087	10	0.79	31.5	911.244	40.1	9.21027	5.76016
Infineon Technologies AG	DE016	Germany	2002	0	11354.4	374.7	0.997	0.119	151.8	0.5	0.116	1411.2	4006	10	1.19	30.3	958.053	42.4	9.33736	5.92613
Infineon Technologies AG	DE016	Germany	2003	-0.7	10167.9	365.8	1.086	0.088	143.7	0.4	0.092	1178.8	2733	10	0.88	27.8	1044.49	25.6	9.22699	5.90209
Infineon Technologies AG	DE016	Germany	2004	1.2	11111.7	364.3	1.071	0.121	182.7	0.6	0.13	1615.7	1295	10	1.21	30.5	1039.1	46.1	9.31575	5.89798
Infineon Technologies AG	DE016	Germany	2005	0.7	12250.8	428.3	1.09	0.157	227.1	0.9	0.147	1491.3	1988	10	1.57	28.6	1088.79	43.1	9.41335	6.05982
Infineon Technologies AG	DE016	Germany	2006	3.7	13932.7	424.8	1.16	0.193	222.1	1.1	0.173	1697.2	1858	10	1.93	32.8	1218.05	44.6	9.54199	6.05162
Infineon Technologies AG	DE016	Germany	2007	3.3	15095.8	553	1.115	0.176	224.5	1	0.166	2068.5	2949	10	1.76	27.3	1506.32	34.5	9.62217	6.31536
Infineon Technologies AG	DE016	Germany	2008	1.1	13454	459.2	1.2	0.246	265.1	1.3	0.274	1566	5233	10	2.46	29.3	1198.74	47	9.50703	6.12949
Infineon Technologies AG	DE016	Germany	2009	-5.7	9093.5	301.1	1.139	0.248	168.5	1.1	0.24	1092.2	3663	10	2.48	30.2	862.566	43.2	9.11532	5.70744
Infineon Technologies AG	DE016	Germany	2010	4.2	19324.4	625.4	1.154	0.236	376.2	1.4	0.244	2580.6	8499	10	2.36	30.9	1884.3	46.4	9.86912	6.43839
Infineon Technologies AG	DE016	Germany	2011	3.9	20309	725.3	1.221	0.278	433.1	1.3	0.303	2995.9	3353	10	2.78	28	2160.49	44.8	9.91882	6.58659
Infineon Technologies AG	DE016	Germany	2012	0.4	15554.4	501.8	1.246	0.347	357.5	1.5	0.323	1856.4	4664	10	3.47	31	1381.49	50.1	9.6521	6.2182
Infineon Technologies AG	DE016	Germany	2013	0.4	16443.8	583.1	1.249	0.356	384	1.9	0.372	2476.8	6076	10	3.56	28.2	1589.68	55.3	9.7077	6.36836
Infineon Technologies AG	DE016	Germany	2014	1.9	19658.4	712.3	1.274	0.367	528.5	1.9	0.312	2773.7	4302	10	3.67	27.6	2027.07	46.2	9.88626	6.5685
Infineon Technologies AG	DE016	Germany	2015	1.5	19757.2	672	1.288	0.43	557.5	2.3	0.407	2451.7	4811	10	4.3	29.4	2053.27	36.7	9.89127	6.51026
Infineon Technologies AG	DE016	Germany	2016	2.2	22424.5	685.8	1.317	0.415	631.2	2.5	0.383	3293.8	2772	10	4.15	32.7	1961.6	46.2	10.0179	6.53059
Infineon Technologies AG	DE016	Germany	2017	2.5	22604.1	819	1.305	0.453	559.4	2.4	0.518	2857.1	3056	10	4.53	27.6	2469.45	51.4	10.0259	6.70808
Infineon Technologies AG	DE016	Germany	2018	1.5	23647.7	856.8	1.342	0.514	631	2.2	0.519	3148.1	4773	10	5.14	27.6	2492.11	54	10.071	6.7532
Infineon Technologies AG	DE016	Germany	2019	0.6	22100.7	673.8	1.357	0.467	579.7	2.3	0.399	2692.9	4992	10	4.67	32.8	1952.69	49.4	10.0034	6.51293
Infineon Technologies AG	DE016	Germany	2020	-4.1	12047.4	404.3	1.37	0.562	393.3	2.9	0.54	1830.5	4446	10	5.62	29.8	1160.03	49.5	9.3966	6.00216
Infineon Technologies AG	DE016	Germany	2021	2.6	30048.5	930.3	1.409	0.54	1058.2	2.6	0.616	4583.7	4903	10	5.4	32.3	2526.38	46.7	10.3106	6.83551
Infineon Technologies AG	DE016	Germany	2022	1.8	29520.7	934.2	1.432	0.575	868.3	2.7	0.634	4494.1	11285	10	5.75	31.6	2406.9	49.1	10.2928	6.83969
Infineon Technologies AG	DE016	Germany	2023	-0.3	23496.1	720.7	1.432	0.677	780.5	3.3	0.706	3407.8	7968	10	6.77	32.6	1969.86	53.3	10.0646	6.58022
Infineon Technologies AG	DE016	Germany	2024	-0.2	25682.6	853.2	1.444	0.655	799.6	2.9	0.696	3149.4	10748	10	6.55	30.1	2444.51	47	10.1536	6.74899
Infineon Technologies AG	DE016	Germany	2025	0.5	28927.1	961	1.459	0.757	1053.7	4.1	0.859	4273.1	4688	10	7.57	30.1	2806.19	55.3	10.2725	6.86797
Deutsche Telekom AG	DE017	Germany	2000	2.9	75195.7	679.3	1.031	0.059	931.5	0.3	0.061	1811.5	3548	10	0.59	110.7	1575.87	37.9	11.2278	6.52106
Deutsche Telekom AG	DE017	Germany	2001	1.5	76267.9	619.6	0.993	0.05	888.9	0.3	0.053	2367.4	7656	10	0.5	123.1	1311.95	38.8	11.242	6.42907
Deutsche Telekom AG	DE017	Germany	2002	0	78514.8	771.3	1.101	0.1	1221.5	0.4	0.09	1924.9	2575	10	1	101.8	1796.22	35.2	11.271	6.64808
Deutsche Telekom AG	DE017	Germany	2003	-0.7	78892.1	661.3	1.047	0.089	931.1	0.5	0.095	1905	1669	10	0.89	119.3	1490.87	34.2	11.2758	6.49421
Deutsche Telekom AG	DE017	Germany	2004	1.2	87550.1	768	1.092	0.094	1290.3	0.5	0.086	2254.8	4962	10	0.94	114	1620.96	33.7	11.38	6.64379
Deutsche Telekom AG	DE017	Germany	2005	0.7	80933.4	668.9	1.138	0.12	1044	0.6	0.131	1981.5	5988	10	1.2	121	1571.52	38.6	11.3014	6.50563
Deutsche Telekom AG	DE017	Germany	2006	3.7	109346	937.8	1.166	0.109	1676.9	0.6	0.108	2990.6	5830	10	1.09	116.6	2128.32	32	11.6023	6.84354
Deutsche Telekom AG	DE017	Germany	2007	3.3	107742	871.7	1.153	0.145	1549.5	0.8	0.129	3400.5	9873	10	1.45	123.6	1996.28	36.7	11.5875	6.77045
Deutsche Telekom AG	DE017	Germany	2008	1.1	97864.1	835	1.192	0.173	1506.9	0.8	0.193	2627.3	6659	10	1.73	117.2	1789.39	41.9	11.4913	6.72743
Deutsche Telekom AG	DE017	Germany	2009	-5.7	67735.5	557.5	1.165	0.202	1241.5	1	0.226	2042.4	4262	10	2.02	121.5	1153.29	35.6	11.1234	6.32346
Deutsche Telekom AG	DE017	Germany	2010	4.2	144212	1220.1	1.215	0.188	2496.5	1.1	0.187	3970.6	4297	10	1.88	118.2	2483.79	47.4	11.879	7.10669
Deutsche Telekom AG	DE017	Germany	2011	3.9	147061	1191.7	1.196	0.211	3076.1	1.1	0.229	3761.9	12864	10	2.11	123.4	2436.21	45.2	11.8986	7.08314
Deutsche Telekom AG	DE017	Germany	2012	0.4	111707	1004.6	1.233	0.23	2002.4	1	0.218	3450.9	4270	10	2.3	111.2	2100.95	46.2	11.6236	6.91234
Deutsche Telekom AG	DE017	Germany	2013	0.4	126469	1161.3	1.307	0.29	2501.7	1.4	0.266	3276.9	2748	10	2.9	108.9	2749.91	44.1	11.7478	7.0573
Deutsche Telekom AG	DE017	Germany	2014	1.9	145045	1420.6	1.314	0.299	2736.4	1.6	0.344	3898.6	6586	10	2.99	102.1	3379.94	53.4	11.8848	7.25883
Deutsche Telekom AG	DE017	Germany	2015	1.5	140480	1217.3	1.347	0.341	3508.9	1.8	0.291	3360	3889	10	3.41	115.4	2594.01	40.6	11.8528	7.10439
Deutsche Telekom AG	DE017	Germany	2016	2.2	160092	1426.8	1.319	0.404	4108.8	1.7	0.463	4511.5	15239	10	4.04	112.2	3349.66	46.6	11.9835	7.26319
Deutsche Telekom AG	DE017	Germany	2017	2.5	173298	1653.6	1.389	0.42	4193.8	1.8	0.456	4605.7	9473	10	4.2	104.8	3853.13	51.1	12.0628	7.41071
Deutsche Telekom AG	DE017	Germany	2018	1.5	165088	1564.8	1.398	0.479	4807.5	2.3	0.543	4770	4785	10	4.79	105.5	3369.56	54.1	12.0142	7.35551
Deutsche Telekom AG	DE017	Germany	2019	0.6	151569	1457.4	1.432	0.489	5129.1	2.1	0.488	3603.6	4439	10	4.89	104	3372.51	53	11.9288	7.28441
Deutsche Telekom AG	DE017	Germany	2020	-4.1	92951.1	892	1.452	0.515	3216.4	2.9	0.525	2985.2	7924	10	5.15	104.2	1958.95	59.4	11.4398	6.79347
Deutsche Telekom AG	DE017	Germany	2021	2.6	208359	1743.6	1.467	0.562	7327.6	2.9	0.487	6353.6	20316	10	5.62	119.5	4121.98	51.6	12.247	7.46371
Deutsche Telekom AG	DE017	Germany	2022	1.8	211916	1969.5	1.492	0.566	7511.1	2.4	0.537	5805.5	6735	10	5.66	107.6	4165.81	53.5	12.2639	7.58553
Deutsche Telekom AG	DE017	Germany	2023	-0.3	167750	1437.4	1.548	0.661	5688.9	2.8	0.592	4788.2	14833	10	6.61	116.7	3015.4	59.7	12.0302	7.27059
Deutsche Telekom AG	DE017	Germany	2024	-0.2	181387	1725.9	1.514	0.754	7794	3.6	0.73	4535.5	4131	10	7.54	105.1	3897.39	58.4	12.1084	7.4535
Deutsche Telekom AG	DE017	Germany	2025	0.5	200550	1696.7	1.558	0.727	8911.3	3.6	0.66	5811.8	17690	10	7.27	118.2	3856.43	58.2	12.2088	7.43644
Henkel AG	DE018	Germany	2000	2.9	19129.8	421.4	1.027	0.085	279	0.4	0.073	612.3	1636	10	0.85	45.4	884.17	33.4	9.859	6.04358
Henkel AG	DE018	Germany	2001	1.5	19028.8	460.7	1.023	0.094	239.3	0.5	0.09	688	722	10	0.94	41.3	832.407	37.1	9.85371	6.13275
Henkel AG	DE018	Germany	2002	0	19696.9	435.8	1.012	0.144	267.9	0.9	0.156	716.7	1312	10	1.44	45.2	936.677	35.2	9.88822	6.07718
Henkel AG	DE018	Germany	2003	-0.7	19443	487.3	1.051	0.21	358.7	1.1	0.236	706.6	787	10	2.1	39.9	1012.6	44.7	9.87524	6.18888
Henkel AG	DE018	Germany	2004	1.2	21898.1	547.5	1.071	0.151	390	0.8	0.139	832.8	2679	10	1.51	40	1106.11	36.8	9.99416	6.30536
Henkel AG	DE018	Germany	2005	0.7	23094.9	505.4	1.046	0.175	341.9	0.9	0.176	748.6	764	10	1.75	45.7	1053.89	38.7	10.0474	6.22535
Henkel AG	DE018	Germany	2006	3.7	26235.3	635.2	1.113	0.203	421.9	1.1	0.23	1007.6	1279	10	2.03	41.3	1173.56	38.8	10.1749	6.45394
Henkel AG	DE018	Germany	2007	3.3	26546.4	563.6	1.106	0.243	587.7	1.2	0.271	802.1	1230	10	2.43	47.1	1131.82	35.4	10.1866	6.33434
Henkel AG	DE018	Germany	2008	1.1	26380	640.3	1.118	0.247	532.2	1.3	0.22	779.9	1055	10	2.47	41.2	1298.08	38.5	10.1804	6.46194
Henkel AG	DE018	Germany	2009	-5.7	16461.5	351	1.202	0.275	356.3	1.6	0.279	615.5	668	10	2.75	46.9	743.249	40.8	9.70878	5.86079
Henkel AG	DE018	Germany	2010	4.2	36570	836.8	1.151	0.294	791.5	1.2	0.301	1252	2447	10	2.94	43.7	1653.02	48	10.507	6.72959
Henkel AG	DE018	Germany	2011	3.9	35233	790	1.181	0.285	782.3	1.5	0.254	1197.4	3076	10	2.85	44.6	1441.11	45.3	10.4697	6.67203
Henkel AG	DE018	Germany	2012	0.4	27806	594.1	1.164	0.313	552.9	1.6	0.298	978.9	1701	10	3.13	46.8	1241.74	54	10.233	6.38705
Henkel AG	DE018	Germany	2013	0.4	30785.3	684.1	1.21	0.366	714	1.7	0.38	1012	1903	10	3.66	45	1438.1	43.8	10.3348	6.5281
Henkel AG	DE018	Germany	2014	1.9	35717.7	773.1	1.231	0.4	901.9	1.9	0.36	1081.4	2491	10	4	46.2	1446.52	57.2	10.4834	6.65041
Henkel AG	DE018	Germany	2015	1.5	34722.7	828.7	1.284	0.432	825.2	1.9	0.473	1210.7	3667	10	4.32	41.9	1628.44	48.9	10.4551	6.71986
Henkel AG	DE018	Germany	2016	2.2	38296.9	943.3	1.28	0.468	1051.5	2.1	0.417	1347.9	2831	10	4.68	40.6	1999.06	54.5	10.5531	6.84938
Henkel AG	DE018	Germany	2017	2.5	43593.6	997.6	1.336	0.463	1417	2	0.396	1483.5	5098	10	4.63	43.7	2115.41	50.5	10.6827	6.90535
Henkel AG	DE018	Germany	2018	1.5	40207.6	997.7	1.3	0.493	1080.1	2.7	0.444	1362.9	2347	10	4.93	40.3	2191.24	36.8	10.6018	6.90545
Henkel AG	DE018	Germany	2019	0.6	37545.3	920.2	1.348	0.475	1029.9	2.1	0.531	1140.5	3602	10	4.75	40.8	1757.45	50.8	10.5333	6.82459
Henkel AG	DE018	Germany	2020	-4.1	24284.3	564.8	1.379	0.628	839.1	3	0.659	832.7	1566	10	6.28	43	1204	41.7	10.0976	6.33647
Henkel AG	DE018	Germany	2021	2.6	55211.6	1243.5	1.368	0.624	2011.7	2.6	0.664	1719.5	4555	10	6.24	44.4	2695.96	44.7	10.9189	7.12569
Henkel AG	DE018	Germany	2022	1.8	49754.7	1240.8	1.39	0.604	1929	2.6	0.653	1771.6	4539	10	6.04	40.1	2471.28	50.1	10.8149	7.12351
Henkel AG	DE018	Germany	2023	-0.3	38102.4	839.3	1.422	0.693	1434.8	2.9	0.724	1435.1	2470	10	6.93	45.4	1833.67	50	10.548	6.73257
Henkel AG	DE018	Germany	2024	-0.2	43960.7	1059.3	1.429	0.686	1853.4	4	0.707	1573.9	2647	10	6.86	41.5	2288.61	49.9	10.6911	6.96536
Henkel AG	DE018	Germany	2025	0.5	53088.8	1249.1	1.494	0.743	1830.1	3.1	0.765	1917.1	5920	10	7.43	42.5	2742.22	61.5	10.8797	7.13018
Deutsche Post AG (DHL)	DE019	Germany	2000	2.9	54888.5	146	1.01	0.042	567.7	0.2	0.037	1042.4	2879	10	0.42	375.9	206.028	40.1	10.9131	4.98361
Deutsche Post AG (DHL)	DE019	Germany	2001	1.5	55051.7	144.5	1.055	0.06	709.3	0.3	0.058	1021.7	1251	10	0.6	381.1	202.527	37.2	10.916	4.97328
Deutsche Post AG (DHL)	DE019	Germany	2002	0	54443.8	133	1.046	0.068	792.2	0.3	0.069	961.3	1595	10	0.68	409.5	160.284	36.4	10.9049	4.89035
Deutsche Post AG (DHL)	DE019	Germany	2003	-0.7	55861.5	139.4	1.051	0.071	613	0.4	0.076	852.4	770	10	0.71	400.6	181.099	43	10.9306	4.93735
Deutsche Post AG (DHL)	DE019	Germany	2004	1.2	64314.6	173.3	1.054	0.119	895	0.5	0.102	1041	1481	10	1.19	371.2	207.241	44.1	11.0715	5.15502
Deutsche Post AG (DHL)	DE019	Germany	2005	0.7	60791.1	143.2	1.115	0.143	825.3	0.7	0.141	977	2217	10	1.43	424.6	170.47	38	11.0152	4.96424
Deutsche Post AG (DHL)	DE019	Germany	2006	3.7	78137.2	205.8	1.095	0.178	1208	0.8	0.157	1190.6	3732	10	1.78	379.6	264.236	47.4	11.2662	5.3269
Deutsche Post AG (DHL)	DE019	Germany	2007	3.3	83805.4	216	1.161	0.182	1531.8	0.7	0.208	1557.5	2953	10	1.82	388	294.599	43.1	11.3363	5.37528
Deutsche Post AG (DHL)	DE019	Germany	2008	1.1	77349.4	183.5	1.167	0.166	1217.1	0.7	0.142	1227.6	2232	10	1.66	421.5	250.241	43.6	11.2561	5.21221
Deutsche Post AG (DHL)	DE019	Germany	2009	-5.7	50249.4	128.8	1.217	0.262	946.5	1.2	0.295	872.1	937	10	2.62	390.1	155.363	37.8	10.8248	4.85826
Deutsche Post AG (DHL)	DE019	Germany	2010	4.2	93806	234.9	1.149	0.242	1851.4	1.3	0.248	1498.4	5232	10	2.42	399.3	323.314	48.6	11.449	5.45916
Deutsche Post AG (DHL)	DE019	Germany	2011	3.9	108188	277.3	1.23	0.244	1988.9	1	0.27	2171.9	5067	10	2.44	390.1	391.555	46.8	11.5916	5.6251
Deutsche Post AG (DHL)	DE019	Germany	2012	0.4	82399.6	196	1.222	0.243	1438.6	1.3	0.255	1344.5	2520	10	2.43	420.3	229.967	42	11.3193	5.27811
Deutsche Post AG (DHL)	DE019	Germany	2013	0.4	87211.8	221	1.265	0.356	2253	1.9	0.382	1630	2782	10	3.56	394.7	260.315	48	11.3761	5.39816
Deutsche Post AG (DHL)	DE019	Germany	2014	1.9	103639	248.1	1.265	0.354	2192.9	2.1	0.336	1587.4	1677	10	3.54	417.8	330.702	50.5	11.5487	5.51383
Deutsche Post AG (DHL)	DE019	Germany	2015	1.5	107986	242.9	1.227	0.401	2664.8	1.6	0.411	1820.7	3586	10	4.01	444.6	315.174	50.8	11.5898	5.49265
Deutsche Post AG (DHL)	DE019	Germany	2016	2.2	121977	308.6	1.287	0.427	3632.4	1.9	0.476	2191.1	5689	10	4.27	395.2	366.922	47.3	11.7116	5.73205
Deutsche Post AG (DHL)	DE019	Germany	2017	2.5	133303	325.4	1.283	0.442	3189	2	0.419	2309.2	5313	10	4.42	409.6	449.858	40.1	11.8004	5.78506
Deutsche Post AG (DHL)	DE019	Germany	2018	1.5	123744	278.3	1.295	0.443	3640.5	2	0.442	2013.5	5368	10	4.43	444.6	390.165	52.2	11.726	5.6287
Deutsche Post AG (DHL)	DE019	Germany	2019	0.6	111480	284.2	1.309	0.482	3068.7	2.3	0.486	2006.2	4817	10	4.82	392.2	400.549	42.4	11.6216	5.64968
Deutsche Post AG (DHL)	DE019	Germany	2020	-4.1	70818.9	157.6	1.332	0.57	2015.9	2.4	0.545	1354.5	4386	10	5.7	449.4	204.479	46.1	11.1679	5.06006
Deutsche Post AG (DHL)	DE019	Germany	2021	2.6	153098	372.6	1.337	0.55	4940.9	3	0.537	2392.6	3827	10	5.5	410.9	501.771	44.1	11.9388	5.92051
Deutsche Post AG (DHL)	DE019	Germany	2022	1.8	157093	426.5	1.378	0.629	4812	3.1	0.629	2505.1	6645	10	6.29	368.3	514.537	57.1	11.9646	6.05561
Deutsche Post AG (DHL)	DE019	Germany	2023	-0.3	121123	294.7	1.402	0.652	3891.7	3.1	0.687	1954.3	6477	10	6.52	411	375.316	48.8	11.7046	5.68596
Deutsche Post AG (DHL)	DE019	Germany	2024	-0.2	117194	304.2	1.411	0.702	3841.5	3.8	0.761	1885.9	3973	10	7.02	385.3	380.868	51.2	11.6716	5.71769
Deutsche Post AG (DHL)	DE019	Germany	2025	0.5	135664	333.5	1.423	0.707	5238	3.7	0.773	2757.7	9225	10	7.07	406.8	426.341	49.9	11.8179	5.80964
Allianz SE	DE020	Germany	2000	2.9	107378	1427.9	0.972	0.068	1501.7	0.4	0.073	1138.8	3124	10	0.68	75.2	10695.8	34.5	11.5841	7.26396
Allianz SE	DE020	Germany	2001	1.5	118958	1596.8	1.028	0.072	1710.7	0.4	0.072	1168.9	2114	9.3	0.6696	74.5	12345	35.9	11.6865	7.37576
Allianz SE	DE020	Germany	2002	0	122222	1707	1.062	0.067	1372.6	0.4	0.068	1200.3	3156	9.7	0.6499	71.6	12788.8	32	11.7136	7.44249
Allianz SE	DE020	Germany	2003	-0.7	113319	1407.7	1.017	0.108	1507.6	0.6	0.114	1136	2865	10	1.08	80.5	12028.6	38.5	11.638	7.24971
Allianz SE	DE020	Germany	2004	1.2	138101	1947.8	1.02	0.155	2280.4	0.7	0.155	1569	2961	10	1.55	70.9	16463.6	39.1	11.8357	7.57446
Allianz SE	DE020	Germany	2005	0.7	137070	1667.5	1.055	0.094	1789.3	0.4	0.081	1361.4	3716	9.7	0.9118	82.2	14189.1	36.2	11.8282	7.41908
Allianz SE	DE020	Germany	2006	3.7	173229	2344.1	1.08	0.151	2629.8	0.8	0.17	2217.5	4397	10	1.51	73.9	17316.6	44.8	12.0624	7.75966
Allianz SE	DE020	Germany	2007	3.3	165782	2222.3	1.15	0.117	2102.1	0.5	0.109	2104.6	7252	10	1.17	74.6	18678.3	41.3	12.0184	7.7063
Allianz SE	DE020	Germany	2008	1.1	149668	1827.5	1.15	0.25	3198.2	1.3	0.267	1763.4	3891	10	2.5	81.9	14064	43.9	11.9162	7.5107
Allianz SE	DE020	Germany	2009	-5.7	107548	1313.2	1.14	0.244	2376	1.4	0.253	1374.4	3467	10	2.44	81.9	9937.59	33.8	11.5857	7.18022
Allianz SE	DE020	Germany	2010	4.2	205093	2554.1	1.17	0.254	4190.5	1.4	0.279	2294.9	3679	10	2.54	80.3	20242.6	44.6	12.2312	7.84546
Allianz SE	DE020	Germany	2011	3.9	212649	2772.5	1.208	0.25	4304.9	1.1	0.254	2165.4	5060	10	2.5	76.7	22590.5	40.3	12.2674	7.9275
Allianz SE	DE020	Germany	2012	0.4	190347	2684.7	1.166	0.331	4807	1.4	0.38	2113.3	6273	10	3.31	70.9	20620.8	51.8	12.1566	7.89532
Allianz SE	DE020	Germany	2013	0.4	179622	2477.5	1.228	0.328	3723	2	0.321	2150.5	5333	10	3.28	72.5	20535.8	38.6	12.0986	7.81501
Allianz SE	DE020	Germany	2014	1.9	215390	2834.1	1.21	0.38	4951.9	1.7	0.325	2141.5	5134	10	3.8	76	22957.9	54	12.2802	7.94948
Allianz SE	DE020	Germany	2015	1.5	213747	2794.1	1.283	0.376	6153.8	1.7	0.352	2758.6	9624	10	3.76	76.5	21083.4	41.4	12.2725	7.93527
Allianz SE	DE020	Germany	2016	2.2	246630	3090.6	1.254	0.423	6302.9	2.4	0.452	2672.1	7118	10	4.23	79.8	24278.2	48	12.4156	8.03612
Allianz SE	DE020	Germany	2017	2.5	259968	3508.3	1.255	0.463	8385.4	2.1	0.495	3029	7222	10	4.63	74.1	29052	58.6	12.4683	8.16289
Allianz SE	DE020	Germany	2018	1.5	249934	3643.4	1.264	0.505	7304.6	2.6	0.537	2499.4	3743	10	5.05	68.6	29161	43.7	12.429	8.20067
Allianz SE	DE020	Germany	2019	0.6	233823	3032.7	1.309	0.496	6183.9	2.2	0.456	2406.2	7790	10	4.96	77.1	22898.3	54.2	12.3623	8.01721
Allianz SE	DE020	Germany	2020	-4.1	151213	2236.9	1.291	0.526	5182.3	2.8	0.494	1517.5	3902	10	5.26	67.6	16146.9	45.3	11.9264	7.71285
Allianz SE	DE020	Germany	2021	2.6	343110	4461.8	1.353	0.578	12305.5	3.4	0.652	3721.7	11695	10	5.78	76.9	36958	47.1	12.7458	8.40331
Allianz SE	DE020	Germany	2022	1.8	331459	4304.7	1.314	0.645	12639.9	3.5	0.723	4142.8	5707	10	6.45	77	33446.6	51.9	12.7113	8.36746
Allianz SE	DE020	Germany	2023	-0.3	254687	3547.2	1.298	0.626	9489.3	3.5	0.658	2906.1	10102	10	6.26	71.8	28306.4	56.3	12.4478	8.17391
Allianz SE	DE020	Germany	2024	-0.2	276491	3604.8	1.345	0.677	8996.8	2.9	0.722	2758.9	4718	10	6.77	76.7	30987.7	53.9	12.5299	8.19002
Allianz SE	DE020	Germany	2025	0.5	303216	4282.7	1.37	0.689	12759.9	3.9	0.773	3086.9	6788	10	6.89	70.8	36782.8	52.8	12.6222	8.36234
Trumpf GmbH	DE021	Germany	2000	2.9	5470.6	452.1	0.963	0.089	80.6	0.4	0.087	320	784	10	0.89	12.1	773.603	45.2	8.60714	6.1139
Trumpf GmbH	DE021	Germany	2001	1.5	5957	416.6	1.056	0.105	93.2	0.5	0.094	366.5	1258	10	1.05	14.3	661.448	31.8	8.69232	6.03213
Trumpf GmbH	DE021	Germany	2002	0	5780.3	425	1.059	0.12	76.9	0.6	0.114	297.6	332	10	1.2	13.6	643.375	30.1	8.66221	6.05209
Trumpf GmbH	DE021	Germany	2003	-0.7	6268	505.5	1.037	0.117	104.4	0.5	0.119	315.9	257	10	1.17	12.4	838.742	42.7	8.74321	6.22555
Trumpf GmbH	DE021	Germany	2004	1.2	6197.9	442.7	1.082	0.141	104.4	0.7	0.152	332.1	752	10	1.41	14	759.543	47.1	8.73197	6.09289
Trumpf GmbH	DE021	Germany	2005	0.7	7158	591.6	1.104	0.14	123.9	0.7	0.152	442.5	1254	10	1.4	12.1	976.967	34.5	8.87599	6.38283
Trumpf GmbH	DE021	Germany	2006	3.7	8428.4	619.7	1.151	0.202	137	0.8	0.21	521.7	862	10	2.02	13.6	915.235	51	9.03936	6.42924
Trumpf GmbH	DE021	Germany	2007	3.3	8824.3	705.9	1.175	0.172	164	0.7	0.174	470.1	1420	10	1.72	12.5	1033.82	40.6	9.08526	6.55947
Trumpf GmbH	DE021	Germany	2008	1.1	8439.6	649.2	1.184	0.206	138.2	0.9	0.229	506.6	530	10	2.06	13	1124.21	44.6	9.04069	6.47574
Trumpf GmbH	DE021	Germany	2009	-5.7	5470.9	411.3	1.206	0.249	124.6	1.1	0.273	260.3	887	10	2.49	13.3	672.226	49.5	8.6072	6.01932
Trumpf GmbH	DE021	Germany	2010	4.2	11013	821.9	1.225	0.286	271.3	1.1	0.327	680.6	1616	10	2.86	13.4	1312.2	45.1	9.30683	6.71162
Trumpf GmbH	DE021	Germany	2011	3.9	11801	867.7	1.211	0.288	254.3	1.6	0.311	631.3	783	10	2.88	13.6	1315.8	46.4	9.37594	6.76585
Trumpf GmbH	DE021	Germany	2012	0.4	9309.5	738.8	1.29	0.301	230.6	1.7	0.323	492.8	1462	10	3.01	12.6	1232.82	46.4	9.13879	6.60503
Trumpf GmbH	DE021	Germany	2013	0.4	9681.1	696.5	1.311	0.358	200.9	1.9	0.336	478	976	10	3.58	13.9	1219.37	49.1	9.17793	6.54607
Trumpf GmbH	DE021	Germany	2014	1.9	11302.5	801.6	1.286	0.399	337.2	1.7	0.401	589.5	2045	10	3.99	14.1	1286.69	53.6	9.33278	6.68661
Trumpf GmbH	DE021	Germany	2015	1.5	10912	826.7	1.298	0.408	295.2	1.7	0.351	596.6	1735	10	4.08	13.2	1270.62	55.1	9.29762	6.71744
Trumpf GmbH	DE021	Germany	2016	2.2	13024.6	979.3	1.335	0.439	308	1.8	0.501	757.3	963	10	4.39	13.3	1515.41	56.6	9.4746	6.88684
Trumpf GmbH	DE021	Germany	2017	2.5	13710.8	1071.2	1.366	0.473	365.9	2.8	0.522	642.8	1436	10	4.73	12.8	1865.09	52	9.52594	6.97653
Trumpf GmbH	DE021	Germany	2018	1.5	12883.6	991	1.35	0.495	389.3	2.6	0.518	702.6	1868	10	4.95	13	1478.73	53.8	9.46371	6.89871
Trumpf GmbH	DE021	Germany	2019	0.6	12263.3	895.1	1.352	0.55	450.1	2.4	0.492	771.4	698	10	5.5	13.7	1517.59	56.1	9.41437	6.79694
Trumpf GmbH	DE021	Germany	2020	-4.1	8135	581.1	1.428	0.571	281.6	2.9	0.655	471.1	1098	10	5.71	14	986.136	45.5	9.00393	6.36492
Trumpf GmbH	DE021	Germany	2021	2.6	16007.8	1250.6	1.465	0.585	474.4	3.2	0.603	776	969	10	5.85	12.8	1817.91	48.3	9.68083	7.13138
Trumpf GmbH	DE021	Germany	2022	1.8	16377	1195.4	1.502	0.576	511.8	3.2	0.509	855.7	1172	10	5.76	13.7	1830.75	54.9	9.70363	7.08624
Trumpf GmbH	DE021	Germany	2023	-0.3	13187.5	969.7	1.47	0.647	473.5	2.7	0.695	772.7	1587	10	6.47	13.6	1581.1	47	9.48702	6.87699
Trumpf GmbH	DE021	Germany	2024	-0.2	14240.3	1078.8	1.52	0.689	583.9	3.6	0.782	896	2933	10	6.89	13.2	1594.4	51.8	9.56383	6.9836
Trumpf GmbH	DE021	Germany	2025	0.5	15591.8	1199.4	1.552	0.747	676.5	4.5	0.802	757.5	1048	10	7.47	13	1840.02	58	9.6545	7.08958
Krones AG	DE022	Germany	2000	2.9	4589.7	413.5	0.963	0.01	45.2	0	0.011	242.1	679	10	0.1	11.1	720.063	35.5	8.43157	6.02466
Krones AG	DE022	Germany	2001	1.5	4490.4	431.8	0.99	0.031	55.9	0.1	0.033	185.8	230	10	0.31	10.4	729.25	32.5	8.4097	6.06796
Krones AG	DE022	Germany	2002	0	4552.5	402.9	1.021	0.123	69.4	0.5	0.14	234.7	206	10	1.23	11.3	692.496	37.8	8.42343	5.99869
Krones AG	DE022	Germany	2003	-0.7	4716.4	462.4	1.069	0.043	59.5	0.2	0.038	249	259	10	0.43	10.2	736.294	34.2	8.4588	6.13643
Krones AG	DE022	Germany	2004	1.2	5420.4	553.1	1.053	0.088	65.9	0.5	0.076	284.1	305	10	0.88	9.8	864.408	38.1	8.59792	6.31554
Krones AG	DE022	Germany	2005	0.7	5079.7	453.5	1.095	0.125	80.6	0.6	0.116	214.1	333	10	1.25	11.2	745.009	33.4	8.53301	6.117
Krones AG	DE022	Germany	2006	3.7	6171.1	636.2	1.122	0.182	98.9	1	0.167	270.1	460	10	1.82	9.7	1017.58	42.8	8.72763	6.45551
Krones AG	DE022	Germany	2007	3.3	6946.7	674.4	1.097	0.164	116.5	0.7	0.166	310.5	848	10	1.64	10.3	989.767	45.9	8.84602	6.51382
Krones AG	DE022	Germany	2008	1.1	6354.5	567.4	1.156	0.182	119.4	0.9	0.197	343.2	748	10	1.82	11.2	971.304	46.7	8.75692	6.34106
Krones AG	DE022	Germany	2009	-5.7	4142.9	387.2	1.203	0.201	77.8	1.1	0.223	181.3	343	10	2.01	10.7	633.262	36.9	8.32915	5.95894
Krones AG	DE022	Germany	2010	4.2	8571.7	883.7	1.189	0.262	178.9	1.3	0.262	449.9	1295	10	2.62	9.7	1360.15	40.2	9.05622	6.78412
Krones AG	DE022	Germany	2011	3.9	8456.4	862.9	1.205	0.274	175.5	1.1	0.285	411.5	474	10	2.74	9.8	1507.41	38.4	9.04268	6.7603
Krones AG	DE022	Germany	2012	0.4	6900.6	651	1.237	0.262	125.5	1.6	0.23	342.2	434	10	2.62	10.6	1098.51	34.6	8.83936	6.47851
Krones AG	DE022	Germany	2013	0.4	7088.6	638.6	1.172	0.309	160.4	1.7	0.334	359.1	706	10	3.09	11.1	995.126	43.9	8.86624	6.45928
Krones AG	DE022	Germany	2014	1.9	8157.2	776.9	1.234	0.366	178.7	1.6	0.38	375.2	1048	10	3.66	10.5	1123.97	48.6	9.00666	6.65531
Krones AG	DE022	Germany	2015	1.5	8762.2	876.2	1.271	0.378	189	1.9	0.375	470.9	832	10	3.78	10	1386.97	41.8	9.0782	6.77559
Krones AG	DE022	Germany	2016	2.2	9224.4	823.6	1.225	0.382	206.3	1.6	0.414	483.3	756	10	3.82	11.2	1275.13	50.6	9.12961	6.71368
Krones AG	DE022	Germany	2017	2.5	10955.6	1043.4	1.3	0.475	289.6	2.4	0.455	465	990	10	4.75	10.5	1655.74	50.8	9.30161	6.95024
Krones AG	DE022	Germany	2018	1.5	10191.2	935	1.299	0.445	313.2	1.9	0.487	479.1	975	10	4.45	10.9	1420.25	49	9.22928	6.84055
Krones AG	DE022	Germany	2019	0.6	9505.4	848.7	1.335	0.476	311.1	2.4	0.517	517.2	1669	10	4.76	11.2	1457.86	46.7	9.15962	6.74371
Krones AG	DE022	Germany	2020	-4.1	6008	556.3	1.318	0.552	210.3	3.1	0.504	284.5	354	10	5.52	10.8	838.759	51.5	8.70085	6.32131
Krones AG	DE022	Germany	2021	2.6	13660.1	1253.2	1.376	0.589	445.8	2.5	0.535	614.8	1220	10	5.89	10.9	2116.41	39.3	9.52223	7.13346
Krones AG	DE022	Germany	2022	1.8	12088.2	1079.3	1.337	0.648	415.7	2.9	0.685	559.4	1640	10	6.48	11.2	1803.77	53.7	9.39999	6.98407
Krones AG	DE022	Germany	2023	-0.3	10139.7	930.2	1.387	0.648	330	3.6	0.728	511.6	1037	10	6.48	10.9	1380.05	51.4	9.22421	6.8354
Krones AG	DE022	Germany	2024	-0.2	10004.8	1031.4	1.35	0.671	379.6	3.4	0.654	439.9	732	10	6.71	9.7	1710.54	57.4	9.21082	6.93867
Krones AG	DE022	Germany	2025	0.5	12110.4	1248.5	1.419	0.714	428.7	3.5	0.693	512	492	10	7.14	9.7	1968.86	50	9.40182	7.1297
Dürr AG	DE023	Germany	2000	2.9	4468.2	421.5	1.038	0.12	72	0.6	0.103	218.6	491	10	1.2	10.6	688.066	38.4	8.40474	6.04382
Dürr AG	DE023	Germany	2001	1.5	4595.5	417.8	0.991	0.113	75.8	0.6	0.12	231	732	10	1.13	11	573.927	43.1	8.43283	6.035
Dürr AG	DE023	Germany	2002	0	4815	496.4	1.029	0.116	76.5	0.6	0.109	195.3	587	10	1.16	9.7	715.629	37.7	8.47949	6.20738
Dürr AG	DE023	Germany	2003	-0.7	5172.2	544.4	1.095	0.106	71.9	0.5	0.096	263.6	381	10	1.06	9.5	879.874	46.4	8.55105	6.29968
Dürr AG	DE023	Germany	2004	1.2	5243.2	529.6	1.057	0.156	96.6	0.8	0.175	268.7	626	10	1.56	9.9	822.222	37.9	8.56469	6.27212
Dürr AG	DE023	Germany	2005	0.7	5223	538.5	1.122	0.14	70	0.8	0.129	217.3	375	10	1.4	9.7	749.278	35	8.56083	6.28879
Dürr AG	DE023	Germany	2006	3.7	6547.3	641.9	1.112	0.174	97.6	0.8	0.197	306	463	10	1.74	10.2	926.833	38	8.78681	6.46443
Dürr AG	DE023	Germany	2007	3.3	6703.3	615	1.138	0.215	134.1	0.9	0.185	331.7	1049	10	2.15	10.9	999.294	39.3	8.81036	6.42162
Dürr AG	DE023	Germany	2008	1.1	6656.6	672.4	1.141	0.204	125.4	1.2	0.226	303.9	581	10	2.04	9.9	1066.76	35.3	8.80336	6.51085
Dürr AG	DE023	Germany	2009	-5.7	4596.4	429.6	1.194	0.235	82.4	1.3	0.248	205.5	320	10	2.35	10.7	650.673	48	8.43303	6.06285
Dürr AG	DE023	Germany	2010	4.2	7871.9	722.2	1.223	0.257	156.6	1.3	0.27	347.6	1044	10	2.57	10.9	1154.61	38	8.97105	6.5823
Dürr AG	DE023	Germany	2011	3.9	8868.5	791.8	1.244	0.289	165.2	1.4	0.249	354.3	951	10	2.89	11.2	1279.32	46.1	9.09026	6.67431
Dürr AG	DE023	Germany	2012	0.4	7301.5	768.6	1.235	0.287	163.4	1.4	0.279	291.7	698	10	2.87	9.5	1220.39	46.8	8.89584	6.64457
Dürr AG	DE023	Germany	2013	0.4	7148.9	655.9	1.268	0.359	173.6	1.6	0.373	347.7	843	10	3.59	10.9	1029.64	48	8.87471	6.48601
Dürr AG	DE023	Germany	2014	1.9	8625.9	871.3	1.29	0.41	228.8	2.3	0.352	380.4	437	10	4.1	9.9	1381.24	53.1	9.06252	6.76999
Dürr AG	DE023	Germany	2015	1.5	9267.9	891.1	1.259	0.418	247.4	1.7	0.436	433.5	830	10	4.18	10.4	1218.96	48.8	9.13431	6.79246
Dürr AG	DE023	Germany	2016	2.2	10931.1	1175.4	1.328	0.395	256.6	2	0.432	539.6	1668	10	3.95	9.3	1590.76	47.6	9.29937	7.06936
Dürr AG	DE023	Germany	2017	2.5	10965.4	1044.3	1.324	0.442	331.6	2.1	0.454	484	1140	10	4.42	10.5	1429.81	47.8	9.3025	6.9511
Dürr AG	DE023	Germany	2018	1.5	10852.2	1085.2	1.385	0.472	319.2	2.1	0.411	511.3	1048	10	4.72	10	1627.73	55.5	9.29212	6.98952
Dürr AG	DE023	Germany	2019	0.6	9387.8	948.3	1.424	0.548	305.6	2.6	0.5	470.7	1048	10	5.48	9.9	1554.85	51.1	9.14717	6.85467
Dürr AG	DE023	Germany	2020	-4.1	5568.6	492.8	1.411	0.551	190.3	2.9	0.554	229.6	433	10	5.51	11.3	756.239	48.7	8.6249	6.2001
Dürr AG	DE023	Germany	2021	2.6	13696.2	1280	1.478	0.573	393.7	2.8	0.492	552.6	451	10	5.73	10.7	1797.83	50.4	9.52487	7.15462
Dürr AG	DE023	Germany	2022	1.8	12529.2	1108.8	1.464	0.597	452.3	3.1	0.629	499.8	614	10	5.97	11.3	1624.91	45.5	9.43582	7.01103
Dürr AG	DE023	Germany	2023	-0.3	10226.7	983.3	1.472	0.624	363.2	3.2	0.605	400.9	1301	10	6.24	10.4	1460.21	61.5	9.23276	6.89091
Dürr AG	DE023	Germany	2024	-0.2	10939.6	1022.4	1.513	0.673	425.8	3.3	0.655	501.1	1206	10	6.73	10.7	1542.58	54.1	9.30014	6.92991
Dürr AG	DE023	Germany	2025	0.5	11634.5	1151.9	1.521	0.726	470.9	4.2	0.812	446.8	1312	10	7.26	10.1	1778.69	57.8	9.36173	7.04917
Fresenius SE	DE024	Germany	2000	2.9	31036.8	485.7	1.036	0.112	477.2	0.6	0.11	1265.3	1567	10	1.12	63.9	964.728	32.9	10.3429	6.18559
Fresenius SE	DE024	Germany	2001	1.5	33800	502.2	1.062	0.114	476	0.6	0.126	1681.9	5621	10	1.14	67.3	1077.03	32.2	10.4282	6.219
Fresenius SE	DE024	Germany	2002	0	29183.2	466.2	1.033	0.101	423.5	0.5	0.091	1171.3	1117	10	1.01	62.6	1071.35	37.2	10.2813	6.14461
Fresenius SE	DE024	Germany	2003	-0.7	31074.9	431	1.085	0.124	411.4	0.5	0.11	1537.9	3961	10	1.24	72.1	914.336	43.6	10.3442	6.06611
Fresenius SE	DE024	Germany	2004	1.2	34543.5	479.8	1.087	0.12	575.7	0.5	0.115	1483.8	1716	10	1.2	72	1013.35	33	10.45	6.17337
Fresenius SE	DE024	Germany	2005	0.7	35012.3	479.6	1.079	0.163	635.5	0.7	0.182	1479.8	2223	10	1.63	73	1128.43	30.4	10.4635	6.17295
Fresenius SE	DE024	Germany	2006	3.7	46573.7	632.8	1.123	0.171	812.3	0.7	0.182	2037.5	2786	10	1.71	73.6	1456.89	35.1	10.7488	6.45015
Fresenius SE	DE024	Germany	2007	3.3	46925.1	732.1	1.114	0.152	794.2	0.8	0.145	2451.1	3636	10	1.52	64.1	1628.05	39.2	10.7563	6.59592
Fresenius SE	DE024	Germany	2008	1.1	45175.3	647.2	1.107	0.198	900.9	0.8	0.223	2277.8	6163	10	1.98	69.8	1317.63	42	10.7183	6.47266
Fresenius SE	DE024	Germany	2009	-5.7	27775.5	370.8	1.156	0.277	577.4	1.6	0.239	1216.1	2011	10	2.77	74.9	837.467	44.5	10.2319	5.91566
Fresenius SE	DE024	Germany	2010	4.2	55477.1	826.8	1.164	0.29	1149.7	1.6	0.28	2294.8	2118	10	2.9	67.1	1736.97	41.1	10.9237	6.71756
Fresenius SE	DE024	Germany	2011	3.9	59480.1	893.1	1.206	0.244	1095.2	1	0.234	2968.7	4115	10	2.44	66.6	2130.15	38.1	10.9934	6.7947
Fresenius SE	DE024	Germany	2012	0.4	46625.6	722.9	1.16	0.287	1116.3	1.7	0.268	2013.4	2460	10	2.87	64.5	1510.81	49.5	10.7499	6.58327
Fresenius SE	DE024	Germany	2013	0.4	52965.8	844.7	1.212	0.307	1214.6	1.6	0.312	2569.1	8280	10	3.07	62.7	1854.05	45.4	10.8774	6.73898
Fresenius SE	DE024	Germany	2014	1.9	62165.5	975.9	1.25	0.345	1284.5	1.6	0.324	2485	3176	10	3.45	63.7	2224.7	39.5	11.0376	6.88336
Fresenius SE	DE024	Germany	2015	1.5	58822.7	836.7	1.205	0.419	1589.2	2.1	0.463	2632.5	4127	10	4.19	70.3	1864.92	49	10.9823	6.72947
Fresenius SE	DE024	Germany	2016	2.2	67077.3	1048.1	1.271	0.424	1954.2	1.9	0.45	2852.2	9811	10	4.24	64	2267.33	42.3	11.1136	6.95473
Fresenius SE	DE024	Germany	2017	2.5	71504.7	1020	1.275	0.466	2063.3	2.5	0.493	3007.3	10210	10	4.66	70.1	2213.52	55.1	11.1775	6.92756
Fresenius SE	DE024	Germany	2018	1.5	68845.3	937.9	1.313	0.469	1850.9	1.9	0.423	3594.8	4830	10	4.69	73.4	1980.9	50.9	11.1396	6.84364
Fresenius SE	DE024	Germany	2019	0.6	63720	961.1	1.293	0.48	2092	2.4	0.504	2998.3	4572	10	4.8	66.3	2260.64	52.3	11.0623	6.86808
Fresenius SE	DE024	Germany	2020	-4.1	37732.9	533	1.33	0.526	997	2.7	0.447	1484.5	3573	10	5.26	70.8	1220.7	60.7	10.5383	6.27852
Fresenius SE	DE024	Germany	2021	2.6	85685.1	1153.2	1.36	0.591	2596.2	2.9	0.545	4242.6	8922	10	5.91	74.3	2685.44	52.3	11.3584	7.0503
Fresenius SE	DE024	Germany	2022	1.8	80334.3	1142.7	1.386	0.609	2829.7	3.1	0.657	4233.5	7477	10	6.09	70.3	2623.09	46.4	11.294	7.04115
Fresenius SE	DE024	Germany	2023	-0.3	66059.7	1019.4	1.383	0.668	2336.6	3.8	0.766	2818	6029	10	6.68	64.8	2422.33	50.8	11.0983	6.92697
Fresenius SE	DE024	Germany	2024	-0.2	73906.6	1009.7	1.367	0.719	3078.7	2.9	0.743	3462.8	8561	10	7.19	73.2	2306.79	59.9	11.2106	6.91741
Fresenius SE	DE024	Germany	2025	0.5	81089.5	1241.8	1.439	0.694	3349.9	3.1	0.718	3508.2	7002	10	6.94	65.3	2520.83	61.7	11.3033	7.12432
Merck KGaA	DE025	Germany	2000	2.9	24649.5	767.9	0.976	0.04	294.5	0.2	0.039	2053.6	6386	10	0.4	32.1	1712.04	28.3	10.1125	6.64366
Merck KGaA	DE025	Germany	2001	1.5	23605	644.9	0.996	0.01	263.7	0.1	0.009	1876.6	4989	10	0.1	36.6	1485.02	42.5	10.0692	6.4691
Merck KGaA	DE025	Germany	2002	0	23543.7	711.3	1.059	0.028	254.6	0.2	0.028	1588.8	1602	10	0.28	33.1	1547.76	39.8	10.0666	6.56709
Merck KGaA	DE025	Germany	2003	-0.7	23783.3	714.2	1.04	0.056	333.2	0.3	0.052	1571.2	5362	10	0.56	33.3	1616.29	34.7	10.0767	6.57116
Merck KGaA	DE025	Germany	2004	1.2	28582.2	919	0.998	0.021	323.9	0.1	0.021	1939.1	5573	10	0.21	31.1	1815.69	36.4	10.2605	6.82329
Merck KGaA	DE025	Germany	2005	0.7	28594.6	787.7	1.054	0.092	397.8	0.4	0.096	2130.7	2205	10	0.92	36.3	1645.58	26.7	10.261	6.66912
Merck KGaA	DE025	Germany	2006	3.7	35417.7	1106.8	1.115	0.132	549	0.6	0.146	2595.5	4920	10	1.32	32	2299.67	48.6	10.475	7.00923
Merck KGaA	DE025	Germany	2007	3.3	36110.1	1037.6	1.162	0.194	604.6	1	0.197	2362.9	2465	10	1.94	34.8	2304.19	41.6	10.4943	6.94467
Merck KGaA	DE025	Germany	2008	1.1	31432.7	1001	1.122	0.204	640.6	0.9	0.214	2697.8	9276	10	2.04	31.4	2122.05	48.1	10.3556	6.90875
Merck KGaA	DE025	Germany	2009	-5.7	23454.4	751.7	1.152	0.179	371.6	0.9	0.159	1562.9	3595	10	1.79	31.2	1623.34	37.3	10.0628	6.62234
Merck KGaA	DE025	Germany	2010	4.2	45152.9	1282.8	1.119	0.175	854.4	0.9	0.169	3760.5	12084	10	1.75	35.2	2828.86	48.3	10.7178	7.1568
Merck KGaA	DE025	Germany	2011	3.9	45569	1424	1.172	0.216	955.8	1.2	0.246	3623.8	11018	10	2.16	32	2985.34	40	10.727	7.26123
Merck KGaA	DE025	Germany	2012	0.4	36310.4	1117.2	1.121	0.256	694.6	1.5	0.261	2972.1	4288	10	2.56	32.5	2415.89	52.7	10.4999	7.01858
Merck KGaA	DE025	Germany	2013	0.4	40020.3	1146.7	1.151	0.325	1037	1.8	0.323	3447.9	8467	10	3.25	34.9	2593.99	53.6	10.5971	7.04464
Merck KGaA	DE025	Germany	2014	1.9	44375.2	1232.6	1.189	0.321	933.3	1.7	0.354	2885.3	9713	10	3.21	36	2352.82	44.1	10.7004	7.11688
Merck KGaA	DE025	Germany	2015	1.5	45279	1264.8	1.207	0.354	1030.5	1.5	0.361	3110.1	8839	10	3.54	35.8	2560.7	48.4	10.7206	7.14267
Merck KGaA	DE025	Germany	2016	2.2	50431.8	1483.3	1.231	0.415	1488.6	1.9	0.392	3902.6	13434	10	4.15	34	3083.34	50.1	10.8284	7.30202
Merck KGaA	DE025	Germany	2017	2.5	56076.2	1579.6	1.25	0.432	1331.2	2.4	0.388	4626	6675	10	4.32	35.5	3015.12	55.8	10.9345	7.36493
Merck KGaA	DE025	Germany	2018	1.5	54740.4	1765.8	1.276	0.475	1631.2	2.7	0.471	3847.3	5071	10	4.75	31	4000.25	53.5	10.9104	7.47636
Merck KGaA	DE025	Germany	2019	0.6	49344.1	1459.9	1.294	0.516	1334.7	3	0.47	3367	6125	10	5.16	33.8	3092.53	40.3	10.8066	7.28612
Merck KGaA	DE025	Germany	2020	-4.1	29349.4	894.8	1.296	0.517	1027	2.7	0.475	1904	6237	10	5.17	32.8	1816.93	51.9	10.287	6.7966
Merck KGaA	DE025	Germany	2021	2.6	70752.2	2190.5	1.291	0.591	2175.4	2.5	0.621	5510	15888	10	5.91	32.3	4832.24	47.2	11.1669	7.69189
Merck KGaA	DE025	Germany	2022	1.8	68679.3	2106.7	1.358	0.584	2455.9	2.9	0.669	5669.6	17276	10	5.84	32.6	4212.6	58.6	11.1372	7.65288
Merck KGaA	DE025	Germany	2023	-0.3	48850.1	1356.9	1.284	0.669	1724.1	3.3	0.689	3222.9	7731	10	6.69	36	2726.38	54	10.7965	7.21296
Merck KGaA	DE025	Germany	2024	-0.2	57395.1	1749.9	1.357	0.659	1945.2	3.7	0.64	3966.6	7312	10	6.59	32.8	3670.66	49.2	10.9577	7.46731
Merck KGaA	DE025	Germany	2025	0.5	63487.5	1872.8	1.337	0.716	2117.5	4.3	0.766	5043.3	17028	10	7.16	33.9	4031.98	54.4	11.0586	7.53519
TotalEnergies SE	FR001	France	2000	3.9	199141	2205.3	1.029	0.063	2331.8	0.3	0.069	5831.4	4701	10	0.63	90.3	4075.11	38.6	12.2018	7.69862
TotalEnergies SE	FR001	France	2001	1.9	209156	2637.5	1.02	0.107	3013.2	0.5	0.097	6928.5	12424	10	1.07	79.3	4754.06	31.2	12.2508	7.87759
TotalEnergies SE	FR001	France	2002	1.1	219447	2612.5	1.062	0.04	2330.5	0.2	0.042	7415.5	10662	10	0.4	84	5164.79	39.4	12.2989	7.86806
TotalEnergies SE	FR001	France	2003	0.8	216050	2411.3	1.074	0.058	2725.4	0.3	0.056	6492.7	17239	10	0.58	89.6	4639.21	32	12.2833	7.78792
TotalEnergies SE	FR001	France	2004	2.8	268525	3090	1.104	0.121	3666.3	0.5	0.114	7381.2	9340	10	1.21	86.9	5708.1	40.5	12.5007	8.03593
TotalEnergies SE	FR001	France	2005	1.7	263199	3148.3	1.069	0.068	3081	0.3	0.069	9371.6	8178	10	0.68	83.6	6692.19	48.2	12.4807	8.05462
TotalEnergies SE	FR001	France	2006	2.4	289827	3106.4	1.147	0.145	3935.8	0.6	0.153	10621.2	28809	10	1.45	93.3	6612.82	40.2	12.577	8.04122
TotalEnergies SE	FR001	France	2007	2.4	301150	3895.9	1.16	0.125	4878.5	0.6	0.112	8609	24579	10	1.25	77.3	7133.01	53.2	12.6154	8.26768
TotalEnergies SE	FR001	France	2008	-2.9	220433	2504.9	1.16	0.195	3949.2	1.2	0.191	6488.9	5723	10	1.95	88	5297.87	41.1	12.3033	7.826
TotalEnergies SE	FR001	France	2009	1.5	299709	3755.8	1.166	0.214	5366.4	1.3	0.233	9538.3	13094	10	2.14	79.8	7471.16	46	12.6106	8.23106
TotalEnergies SE	FR001	France	2010	2.1	329557	3942.1	1.231	0.232	6940.3	1.4	0.25	10613.8	24321	10	2.32	83.6	7948.31	47.7	12.7055	8.27947
TotalEnergies SE	FR001	France	2011	0.2	306922	3929.9	1.284	0.19	5473.7	1	0.209	8392.5	22108	10	1.9	78.1	8181.84	42.6	12.6343	8.27637
TotalEnergies SE	FR001	France	2012	0	335487	4214.7	1.3	0.294	6306.3	1.3	0.253	11339.5	39333	10	2.94	79.6	9100.45	42.6	12.7233	8.34633
TotalEnergies SE	FR001	France	2013	0.6	341893	4144.2	1.317	0.324	7061.8	1.3	0.349	10007.8	14515	10	3.24	82.5	8759.99	48.5	12.7423	8.32947
TotalEnergies SE	FR001	France	2014	0.9	373348	4848.7	1.356	0.367	9843.3	2	0.328	10216.4	16393	10	3.67	77	10054.6	54.7	12.8303	8.48647
TotalEnergies SE	FR001	France	2015	1.1	411453	4482.1	1.363	0.349	9857.6	1.5	0.308	14280.3	24918	10	3.49	91.8	8933.96	45.3	12.9274	8.40785
TotalEnergies SE	FR001	France	2016	1.2	421365	5444	1.383	0.398	12110.6	1.9	0.435	13952.2	16097	10	3.98	77.4	9805.96	43.9	12.9513	8.60227
TotalEnergies SE	FR001	France	2017	2.4	498767	5468.9	1.423	0.403	13098.6	1.7	0.461	15168.4	24110	10	4.03	91.2	10517.3	45	13.1199	8.60683
TotalEnergies SE	FR001	France	2018	1.7	484565	5402.1	1.435	0.452	15011.6	2.7	0.4	16753.1	25859	10	4.52	89.7	11310.3	56.5	13.091	8.59454
TotalEnergies SE	FR001	France	2019	1.5	483032	6122.1	1.426	0.518	13485.7	2.6	0.448	13371.7	46139	10	5.18	78.9	12198.5	48.5	13.0878	8.71966
TotalEnergies SE	FR001	France	2020	-7.9	168863	1874.2	1.464	0.549	4651.5	3	0.574	6205.1	10176	10	5.49	90.1	3881.09	53.7	12.0368	7.53594
TotalEnergies SE	FR001	France	2021	6.8	950661	10705.6	1.518	0.578	27337.8	3.2	0.647	30722.5	68283	10	5.78	88.8	20085.5	46.5	13.7649	9.27852
TotalEnergies SE	FR001	France	2022	2.5	613587	6972.6	1.587	0.576	22794.8	2.9	0.643	18342.1	64065	10	5.76	88	13957	46.8	13.3271	8.84974
TotalEnergies SE	FR001	France	2023	0.8	516286	5581.5	1.604	0.694	19349.8	3.4	0.711	17311.8	26111	10	6.94	92.5	12109.6	56.2	13.1544	8.62721
TotalEnergies SE	FR001	France	2024	1.1	564482	6744.1	1.585	0.728	20778.8	3.1	0.768	19592.4	32474	10	7.28	83.7	12486.8	59.7	13.2437	8.81642
TotalEnergies SE	FR001	France	2025	0.9	605600	6993.1	1.579	0.73	24509.1	4.2	0.742	20216.1	40174	10	7.3	86.6	13361.2	55.4	13.314	8.85268
Airbus SE	FR002	France	2000	3.9	48520.5	606.5	1.023	0.073	662.5	0.3	0.062	2460.3	3913	10	0.73	80	1090.97	46.1	10.7897	6.4077
Airbus SE	FR002	France	2001	1.9	54824.8	651.1	1.03	0.11	885	0.5	0.109	2497.5	7536	10	1.1	84.2	1175.11	35.3	10.9119	6.47866
Airbus SE	FR002	France	2002	1.1	51472.6	701.3	0.986	0.136	877.1	0.6	0.14	2450.5	3145	10	1.36	73.4	1143.4	36.4	10.8488	6.55294
Airbus SE	FR002	France	2003	0.8	52690.5	725.8	1.033	0.1	727.3	0.5	0.095	2223.2	4199	10	1	72.6	1210.96	42.2	10.8722	6.58727
Airbus SE	FR002	France	2004	2.8	64091.1	732.5	1.082	0.149	1161.8	0.8	0.158	3348	4913	10	1.49	87.5	1242.22	47	11.0681	6.59646
Airbus SE	FR002	France	2005	1.7	60262.4	706.5	1.086	0.151	1021.2	0.6	0.163	3150.3	3191	10	1.51	85.3	1199.53	42.2	11.0065	6.56032
Airbus SE	FR002	France	2006	2.4	69474.1	836	1.134	0.174	1069.4	0.7	0.167	3937.1	8644	10	1.74	83.1	1437.73	30.5	11.1487	6.72863
Airbus SE	FR002	France	2007	2.4	68955.5	800.9	1.089	0.186	1185.4	0.9	0.206	3823.2	7242	10	1.86	86.1	1472.34	36.2	11.1412	6.68574
Airbus SE	FR002	France	2008	-2.9	55132.7	744	1.097	0.201	1080.9	1	0.176	2972.9	5334	10	2.01	74.1	1140.28	48	10.9175	6.61204
Airbus SE	FR002	France	2009	1.5	69247.7	819.5	1.173	0.219	1229.8	1.1	0.224	3624.2	11759	10	2.19	84.5	1337.76	48.7	11.1454	6.70869
Airbus SE	FR002	France	2010	2.1	82942.2	1020.2	1.13	0.25	1846.2	1.3	0.247	3836	12259	10	2.5	81.3	1868.19	41.9	11.3259	6.92775
Airbus SE	FR002	France	2011	0.2	72317.6	837	1.147	0.297	1370.3	1.3	0.313	3954.1	8903	10	2.97	86.4	1390.87	48.5	11.1888	6.72982
Airbus SE	FR002	France	2012	0	71727.6	816.9	1.213	0.322	1768	1.9	0.319	3300.4	3798	10	3.22	87.8	1460.95	41.4	11.1806	6.70552
Airbus SE	FR002	France	2013	0.6	83078	982	1.152	0.333	2148.3	1.5	0.381	3764.9	10113	10	3.33	84.6	1802.14	35.4	11.3275	6.88959
Airbus SE	FR002	France	2014	0.9	82421.4	1058	1.224	0.413	1969.6	2.1	0.413	4273.1	6101	10	4.13	77.9	1724.01	48.7	11.3196	6.96414
Airbus SE	FR002	France	2015	1.1	92968	1246.2	1.224	0.394	2553.4	2	0.39	3911.9	3370	10	3.94	74.6	1950.76	46.4	11.44	7.12785
Airbus SE	FR002	France	2016	1.2	98290.1	1322.9	1.213	0.442	2497.5	2.6	0.503	5254.9	5802	10	4.42	74.3	2201.51	48.5	11.4957	7.18758
Airbus SE	FR002	France	2017	2.4	117598	1509.6	1.265	0.471	3483.5	2.4	0.527	6570.3	10275	10	4.71	77.9	2748.15	43.4	11.675	7.3196
Airbus SE	FR002	France	2018	1.7	115634	1480.6	1.287	0.509	3770.1	2.2	0.555	6247.7	21363	10	5.09	78.1	2411.71	57.5	11.6582	7.3002
Airbus SE	FR002	France	2019	1.5	119296	1647.7	1.317	0.503	3126.1	2.1	0.551	6370.1	6488	10	5.03	72.4	2979	51.6	11.6894	7.40714
Airbus SE	FR002	France	2020	-7.9	38974	494	1.306	0.534	1199	2.2	0.528	1658.2	1890	10	5.34	78.9	842.669	57.5	10.5707	6.20254
Airbus SE	FR002	France	2021	6.8	241774	3177.1	1.313	0.584	8811.8	3.4	0.517	11444.3	36112	10	5.84	76.1	5062.29	45.8	12.3958	8.06372
Airbus SE	FR002	France	2022	2.5	152754	1822.8	1.312	0.638	5587.7	3.1	0.672	7148.1	12487	10	6.38	83.8	2835.08	59.2	11.9366	7.50813
Airbus SE	FR002	France	2023	0.8	130661	1785	1.333	0.629	5175.1	3.6	0.643	6799.8	23570	10	6.29	73.2	2739.6	59.3	11.7804	7.48717
Airbus SE	FR002	France	2024	1.1	147330	1943.7	1.357	0.689	5703.1	3.2	0.684	7466.7	23496	10	6.89	75.8	3343.56	56	11.9004	7.57235
Airbus SE	FR002	France	2025	0.9	142041	1951.1	1.379	0.734	4871.2	4.1	0.815	7335.7	20491	10	7.34	72.8	3434.55	53.3	11.8639	7.57615
Renault Group	FR003	France	2000	3.9	45250.6	605.8	0.999	0.114	741.2	0.6	0.104	1720.5	4673	10	1.14	74.7	1143.41	37.9	10.72	6.40655
Renault Group	FR003	France	2001	1.9	45108.8	589.7	0.991	0.14	761.3	0.8	0.14	2200.3	4838	10	1.4	76.5	978.813	36.6	10.7168	6.37961
Renault Group	FR003	France	2002	1.1	45630.4	581.3	1.067	0.071	539.1	0.3	0.073	2092.4	3432	10	0.71	78.5	989.566	33.6	10.7283	6.36527
Renault Group	FR003	France	2003	0.8	47369	719.9	1.058	0.149	819.4	0.7	0.169	2017.9	3296	10	1.49	65.8	1206.61	35.1	10.7657	6.57911
Renault Group	FR003	France	2004	2.8	50280	763	1.066	0.159	873.7	0.9	0.143	2281.7	3005	10	1.59	65.9	1256.86	41.2	10.8254	6.63726
Renault Group	FR003	France	2005	1.7	51027.3	657.6	1.103	0.191	769.1	1	0.197	2031.3	7097	10	1.91	77.6	1172.97	30.5	10.8401	6.4886
Renault Group	FR003	France	2006	2.4	57157.1	719.9	1.113	0.218	1216.2	1.2	0.207	2135.6	3607	10	2.18	79.4	1185.13	33	10.9536	6.57911
Renault Group	FR003	France	2007	2.4	61056.1	859.9	1.141	0.22	1002.1	1.1	0.237	2224	3021	10	2.2	71	1510.33	43.5	11.0195	6.75682
Renault Group	FR003	France	2008	-2.9	47798.7	652.1	1.104	0.199	831.1	1	0.203	2236.1	7390	10	1.99	73.3	1290.57	36.4	10.7748	6.4802
Renault Group	FR003	France	2009	1.5	61007.8	786.2	1.155	0.287	1419.3	1.7	0.253	2918.5	8909	10	2.87	77.6	1537.23	37	11.0188	6.66721
Renault Group	FR003	France	2010	2.1	71880.8	986	1.133	0.295	1436.8	1.7	0.285	3046.8	5498	10	2.95	72.9	1767.99	47.1	11.1828	6.89366
Renault Group	FR003	France	2011	0.2	62786.7	789.8	1.202	0.32	1517.2	1.8	0.337	2707	6628	10	3.2	79.5	1429.92	44.1	11.0475	6.67178
Renault Group	FR003	France	2012	0	68007.1	908	1.201	0.37	1746	1.6	0.418	3054.2	8030	10	3.7	74.9	1511.87	45	11.1274	6.81124
Renault Group	FR003	France	2013	0.6	74318.1	965.2	1.259	0.3	1753.2	1.5	0.333	2988.5	4102	10	3	77	1721.49	40.5	11.2161	6.87234
Renault Group	FR003	France	2014	0.9	74022.7	1068.1	1.193	0.397	1991.8	2.1	0.339	3461.1	6394	10	3.97	69.3	1936.64	52.7	11.2121	6.97364
Renault Group	FR003	France	2015	1.1	79274.3	1118.1	1.248	0.427	2287	1.7	0.393	3722.2	3931	10	4.27	70.9	2209.74	44.3	11.2807	7.01939
Renault Group	FR003	France	2016	1.2	89435.2	1315.2	1.242	0.453	2494.2	2.6	0.496	4008.6	9248	10	4.53	68	2306.15	47.2	11.4013	7.18174
Renault Group	FR003	France	2017	2.4	105537	1367.1	1.287	0.464	3317.7	2.3	0.435	4043.6	14108	10	4.64	77.2	2637.34	52	11.5668	7.22045
Renault Group	FR003	France	2018	1.7	100588	1337.6	1.328	0.485	3062.1	2	0.43	4765.3	8470	10	4.85	75.2	2637.76	37.2	11.5188	7.19863
Renault Group	FR003	France	2019	1.5	107394	1602.9	1.346	0.492	3482.3	2.1	0.467	4182.8	9199	10	4.92	67	2696.78	52.2	11.5843	7.37957
Renault Group	FR003	France	2020	-7.9	35887	534	1.323	0.556	1187.7	3	0.515	1637.3	3458	10	5.56	67.2	899.525	40.5	10.4881	6.2804
Renault Group	FR003	France	2021	6.8	217909	2952.7	1.363	0.573	7587.4	2.7	0.509	9980.4	32696	10	5.73	73.8	5083.06	46.6	12.2918	7.99048
Renault Group	FR003	France	2022	2.5	127492	1940.5	1.41	0.626	4205.2	3.6	0.611	5509.2	5626	10	6.26	65.7	3339.65	50.1	11.7558	7.5707
Renault Group	FR003	France	2023	0.8	115220	1662.6	1.376	0.654	4496.1	3.7	0.567	4312.9	4926	10	6.54	69.3	2916.77	54.9	11.6546	7.41614
Renault Group	FR003	France	2024	1.1	114332	1564.1	1.415	0.703	4701.2	2.9	0.64	4253.1	5921	10	7.03	73.1	2664.65	54.4	11.6469	7.35507
Renault Group	FR003	France	2025	0.9	128912	1676.4	1.445	0.745	5628.1	3.9	0.649	6289.4	19679	10	7.45	76.9	3264.09	54	11.7669	7.4244
Stellantis NV	FR004	France	2000	3.9	57532.8	627.4	0.99	0.021	704	0.1	0.019	2883.3	4303	10	0.21	91.7	1021.7	47.8	10.9601	6.44158
Stellantis NV	FR004	France	2001	1.9	57121.3	532.8	1.024	0.04	685.9	0.2	0.036	2982.4	8843	10	0.4	107.2	950.759	32.5	10.9529	6.27815
Stellantis NV	FR004	France	2002	1.1	61119.6	653.7	1.037	0.103	850.3	0.5	0.1	3215.1	9651	10	1.03	93.5	1251.5	42	11.0206	6.48265
Stellantis NV	FR004	France	2003	0.8	67047.5	699.1	1.119	0.105	968.5	0.5	0.106	3805.9	7417	10	1.05	95.9	1202.03	41.1	11.1132	6.54979
Stellantis NV	FR004	France	2004	2.8	72403	677.3	1.08	0.119	984.3	0.6	0.108	3247.4	4829	10	1.19	106.9	1100.42	39.6	11.19	6.51811
Stellantis NV	FR004	France	2005	1.7	79174.8	815.4	1.064	0.144	1271.4	0.6	0.143	4372.5	13394	10	1.44	97.1	1445.88	38.2	11.2794	6.70368
Stellantis NV	FR004	France	2006	2.4	78938.8	732.3	1.166	0.184	1563.8	0.8	0.198	4143.7	6645	10	1.84	107.8	1256.12	44.6	11.2764	6.59619
Stellantis NV	FR004	France	2007	2.4	82556.7	821.5	1.143	0.174	1377.4	0.9	0.152	4559.8	7706	10	1.74	100.5	1522.91	32.3	11.3212	6.71113
Stellantis NV	FR004	France	2008	-2.9	60123.9	645.8	1.207	0.193	1130.4	0.8	0.194	2873.9	4969	10	1.93	93.1	1269.74	40.7	11.0042	6.47049
Stellantis NV	FR004	France	2009	1.5	85570.9	918.1	1.25	0.253	1635.4	1.4	0.234	4409.4	4763	10	2.53	93.2	1779.61	46.6	11.3571	6.82231
Stellantis NV	FR004	France	2010	2.1	95822.1	889.7	1.232	0.202	1763.6	1	0.176	4885.3	9978	10	2.02	107.7	1687.63	44.4	11.4702	6.79088
Stellantis NV	FR004	France	2011	0.2	92157	881.9	1.224	0.245	1699	1.1	0.226	4165.9	3524	10	2.45	104.5	1656.41	45.6	11.4312	6.78208
Stellantis NV	FR004	France	2012	0	87920.4	944.4	1.235	0.299	2116	1.5	0.286	4557.2	5333	10	2.99	93.1	1799.75	50.5	11.3842	6.85055
Stellantis NV	FR004	France	2013	0.6	98153.4	998.5	1.265	0.336	2098.3	1.9	0.338	4493.1	4847	10	3.36	98.3	1962.14	46.4	11.4943	6.90625
Stellantis NV	FR004	France	2014	0.9	107928	1048.9	1.286	0.341	2846.3	1.4	0.376	5565.4	11677	10	3.41	102.9	1957.91	43.8	11.5892	6.9555
Stellantis NV	FR004	France	2015	1.1	109130	1115.8	1.317	0.377	2828.2	1.9	0.402	6077.7	7876	10	3.77	97.8	1948.39	41.6	11.6003	7.01733
Stellantis NV	FR004	France	2016	1.2	112675	1192.3	1.326	0.428	3481.9	1.8	0.4	4816.6	13771	10	4.28	94.5	2055.69	52.1	11.6323	7.08364
Stellantis NV	FR004	France	2017	2.4	135245	1254.6	1.381	0.399	3504.7	1.7	0.365	6425.7	7096	10	3.99	107.8	2088.54	51.7	11.8148	7.13457
Stellantis NV	FR004	France	2018	1.7	132151	1322.8	1.447	0.42	3449.6	2.1	0.373	6769.3	6898	10	4.2	99.9	2242.65	51.9	11.7917	7.18751
Stellantis NV	FR004	France	2019	1.5	131767	1355.6	1.433	0.489	4021.3	2.5	0.505	6925.8	13329	10	4.89	97.2	2404.82	46.1	11.7888	7.212
Stellantis NV	FR004	France	2020	-7.9	50751.7	480.1	1.461	0.549	1530.8	2.7	0.627	2741.5	4366	10	5.49	105.7	788.063	55.2	10.8347	6.17399
Stellantis NV	FR004	France	2021	6.8	275920	2524.4	1.488	0.6	9934	2.5	0.541	13518.5	45404	10	6	109.3	4642.83	54.2	12.5279	7.83376
Stellantis NV	FR004	France	2022	2.5	172490	1903.9	1.516	0.613	6005.5	3.2	0.604	9094	17467	10	6.13	90.6	3695.88	52.8	12.0581	7.55166
Stellantis NV	FR004	France	2023	0.8	154488	1634.8	1.504	0.647	4853.2	2.8	0.557	7742.7	20771	10	6.47	94.5	2925.15	55.7	11.9479	7.39928
Stellantis NV	FR004	France	2024	1.1	167096	1586.9	1.539	0.685	5341.7	3.9	0.684	9387.8	13460	10	6.85	105.3	2910.35	50.7	12.0263	7.36954
Stellantis NV	FR004	France	2025	0.9	166840	1851.7	1.582	0.726	5774.2	3.7	0.641	9361.6	29849	10	7.26	90.1	3345.29	65.8	12.0248	7.52386
Michelin Group	FR005	France	2000	3.9	20556.7	473.7	0.997	0.068	258	0.4	0.067	797.6	1273	10	0.68	43.4	732.094	43.4	9.93094	6.16057
Michelin Group	FR005	France	2001	1.9	22717.8	509.4	1.052	0.084	332.5	0.5	0.073	909.4	784	10	0.84	44.6	822.641	40.8	10.0309	6.23323
Michelin Group	FR005	France	2002	1.1	23389.3	516.3	1.034	0.079	283.9	0.5	0.078	1051	1411	10	0.79	45.3	846.799	42.5	10.06	6.24669
Michelin Group	FR005	France	2003	0.8	23141.2	484.1	1.049	0.105	282.9	0.5	0.105	1049.7	3401	10	1.05	47.8	704.138	35.3	10.0494	6.18229
Michelin Group	FR005	France	2004	2.8	27037.7	604.9	1.069	0.077	322.7	0.4	0.066	1207	2583	10	0.77	44.7	980.136	27.2	10.205	6.40506
Michelin Group	FR005	France	2005	1.7	26345.5	637.9	1.15	0.13	441.6	0.7	0.148	913.7	1021	10	1.3	41.3	920.845	36.4	10.1791	6.45818
Michelin Group	FR005	France	2006	2.4	29567.1	642.8	1.124	0.194	570.4	1.1	0.203	1340.4	1305	10	1.94	46	933.535	42.9	10.2944	6.46583
Michelin Group	FR005	France	2007	2.4	30699.2	750.6	1.114	0.186	587.4	0.8	0.159	1105.2	3286	10	1.86	40.9	1067.62	43.2	10.332	6.62087
Michelin Group	FR005	France	2008	-2.9	21913.6	482.7	1.171	0.225	408.8	0.9	0.199	823.4	1329	10	2.25	45.4	772.562	34.2	9.99486	6.1794
Michelin Group	FR005	France	2009	1.5	31886.3	779.6	1.124	0.218	564.6	1.1	0.222	1424.7	2823	10	2.18	40.9	1217.11	45.2	10.3699	6.65878
Michelin Group	FR005	France	2010	2.1	37110.3	828.4	1.179	0.231	643.3	1.2	0.238	1625.2	5254	10	2.31	44.8	1282.12	43.8	10.5216	6.7195
Michelin Group	FR005	France	2011	0.2	33176.4	738.9	1.187	0.271	680.7	1.2	0.272	1351.4	2559	10	2.71	44.9	1033.57	47.4	10.4096	6.60516
Michelin Group	FR005	France	2012	0	30664.4	692.2	1.233	0.309	717.6	1.9	0.325	1273.6	2516	10	3.09	44.3	1140.6	46.9	10.3309	6.53987
Michelin Group	FR005	France	2013	0.6	36170.4	803.8	1.293	0.348	962.2	1.5	0.344	1574	2326	10	3.48	45	1313.09	37.1	10.496	6.68935
Michelin Group	FR005	France	2014	0.9	38023.6	784	1.281	0.338	992.7	1.8	0.335	1305.5	2862	10	3.38	48.5	1137.78	40.1	10.546	6.66441
Michelin Group	FR005	France	2015	1.1	40250.4	914.8	1.302	0.398	974.7	1.6	0.43	1443.4	1870	10	3.98	44	1405.68	45.1	10.6029	6.81871
Michelin Group	FR005	France	2016	1.2	39614.8	934.3	1.37	0.412	1205.1	2.2	0.441	1671.3	4672	10	4.12	42.4	1391.01	42.1	10.587	6.8398
Michelin Group	FR005	France	2017	2.4	51746.8	1115.2	1.318	0.414	1342.8	1.8	0.37	1784.7	3940	10	4.14	46.4	1761.07	51.4	10.8541	7.01679
Michelin Group	FR005	France	2018	1.7	47076.7	1139.9	1.387	0.46	1168.3	2.3	0.446	1814.8	5897	10	4.6	41.3	1869.25	51	10.7595	7.0387
Michelin Group	FR005	France	2019	1.5	52013.9	1145.7	1.349	0.527	1432.9	2.7	0.462	1829.2	2871	10	5.27	45.4	1874.38	49.9	10.8593	7.04377
Michelin Group	FR005	France	2020	-7.9	17394.8	391.8	1.414	0.571	559.6	2.5	0.575	727	1144	10	5.71	44.4	577.876	55.4	9.76393	5.97075
Michelin Group	FR005	France	2021	6.8	95962.1	2016	1.445	0.565	2750.9	3	0.623	3469.3	5291	10	5.65	47.6	3211.87	53	11.4717	7.60887
Michelin Group	FR005	France	2022	2.5	66804.9	1583.1	1.455	0.605	1982	3.2	0.515	2972.3	8285	10	6.05	42.2	2553.19	47.6	11.1095	7.36714
Michelin Group	FR005	France	2023	0.8	54106.7	1276.1	1.501	0.618	1908.1	3	0.535	2202.8	6728	10	6.18	42.4	1814.42	48.3	10.8987	7.15156
Michelin Group	FR005	France	2024	1.1	63689.9	1564.9	1.471	0.717	2613.1	2.9	0.803	2684.2	3696	10	7.17	40.7	2494.33	57.7	11.0618	7.35558
Michelin Group	FR005	France	2025	0.9	62207.4	1407.4	1.507	0.774	2909.4	3.3	0.739	2391.6	7377	10	7.74	44.2	2054.1	59.8	11.0382	7.2495
Saint-Gobain SA	FR006	France	2000	3.9	53857.4	256.8	1.034	0.112	778.8	0.5	0.121	710.4	784	10	1.12	209.7	321.756	39.9	10.8941	5.5483
Saint-Gobain SA	FR006	France	2001	1.9	56257.3	301.2	1.038	0.07	717.9	0.4	0.061	612.7	580	10	0.7	186.8	347.088	35.8	10.9377	5.70777
Saint-Gobain SA	FR006	France	2002	1.1	56099.6	290.5	1.016	0.17	1073.2	0.7	0.175	725.3	2516	10	1.7	193.1	356.978	32.3	10.9349	5.6716
Saint-Gobain SA	FR006	France	2003	0.8	61205.9	305.7	1.092	0.172	1043.3	0.9	0.157	715.3	2258	10	1.72	200.2	360.994	42.6	11.022	5.7226
Saint-Gobain SA	FR006	France	2004	2.8	63694.6	337.4	1.063	0.17	1015	0.7	0.164	832.9	2272	10	1.7	188.8	397.361	40.9	11.0619	5.82127
Saint-Gobain SA	FR006	France	2005	1.7	66913.6	333.4	1.084	0.159	1245.8	0.8	0.17	681.4	1508	9.4	1.4946	200.7	385.607	40.7	11.1112	5.80934
Saint-Gobain SA	FR006	France	2006	2.4	76772.2	370.2	1.13	0.189	1468.4	0.9	0.188	918.1	1016	10	1.89	207.4	433.564	37.1	11.2486	5.91404
Saint-Gobain SA	FR006	France	2007	2.4	75559.2	393.3	1.165	0.181	1308.1	0.8	0.198	983.1	2896	10	1.81	192.1	442.598	44.7	11.2327	5.97457
Saint-Gobain SA	FR006	France	2008	-2.9	60389.9	298.8	1.218	0.235	1265.2	1.2	0.269	634.9	1901	10	2.35	202.1	327.11	43.3	11.0086	5.69977
Saint-Gobain SA	FR006	France	2009	1.5	82822.7	392.7	1.221	0.263	1796.8	1.1	0.257	877.8	2742	10	2.63	210.9	499.825	40	11.3245	5.97305
Saint-Gobain SA	FR006	France	2010	2.1	82559.8	387.8	1.218	0.267	1882.5	1.4	0.241	851	893	10	2.67	212.9	440.704	51.6	11.3213	5.96049
Saint-Gobain SA	FR006	France	2011	0.2	79199.3	377.5	1.276	0.307	1982.4	1.8	0.28	1020.2	2084	10	3.07	209.8	450.295	40.7	11.2797	5.93357
Saint-Gobain SA	FR006	France	2012	0	80881.7	445.9	1.297	0.328	1965.6	1.5	0.309	1073.6	2267	10	3.28	181.4	540.045	47.1	11.3007	6.10009
Saint-Gobain SA	FR006	France	2013	0.6	85940.9	419.4	1.314	0.358	2284.1	1.9	0.409	1137.9	3887	10	3.58	204.9	522.89	39.9	11.3614	6.03883
Saint-Gobain SA	FR006	France	2014	0.9	96717.4	445.7	1.261	0.422	2374	1.8	0.388	1207.8	1906	10	4.22	217	549.984	34.4	11.4795	6.09965
Saint-Gobain SA	FR006	France	2015	1.1	100297	464.6	1.369	0.461	2447.3	2.3	0.413	1202.5	2698	10	4.61	215.9	613.09	43.9	11.5159	6.14118
Saint-Gobain SA	FR006	France	2016	1.2	117316	570	1.362	0.413	2986.8	2	0.401	1476.2	1191	10	4.13	205.8	683.07	51.5	11.6726	6.34564
Saint-Gobain SA	FR006	France	2017	2.4	132413	672.8	1.395	0.499	4429.9	2.2	0.538	1330	2053	10	4.99	196.8	732.914	53.5	11.7937	6.51145
Saint-Gobain SA	FR006	France	2018	1.7	118059	638.5	1.447	0.482	3893.2	2.2	0.422	1205.9	3552	10	4.82	184.9	813.422	47.5	11.6789	6.45912
Saint-Gobain SA	FR006	France	2019	1.5	129276	688	1.445	0.559	3923.3	3.3	0.641	1334.6	2335	10	5.59	187.9	842.467	52.4	11.7697	6.53379
Saint-Gobain SA	FR006	France	2020	-7.9	40431	194.8	1.514	0.58	1296.8	3.4	0.527	436.2	1015	10	5.8	207.6	245.445	42.1	10.6074	5.27197
Saint-Gobain SA	FR006	France	2021	6.8	266285	1262.6	1.498	0.61	9804.4	3.3	0.536	3174.2	8470	10	6.1	210.9	1533.49	41.7	12.4923	7.14093
Saint-Gobain SA	FR006	France	2022	2.5	153734	826.1	1.491	0.662	4826.8	3.3	0.648	1688.8	3273	10	6.62	186.1	1021.31	55.2	11.943	6.71672
Saint-Gobain SA	FR006	France	2023	0.8	130861	678	1.563	0.642	5186.9	2.9	0.628	1474.8	2622	10	6.42	193	737.003	52.4	11.7819	6.51915
Saint-Gobain SA	FR006	France	2024	1.1	143827	735.3	1.54	0.664	4975.9	3	0.671	1717.5	2698	10	6.64	195.6	842.596	51.9	11.8764	6.60028
Saint-Gobain SA	FR006	France	2025	0.9	156041	794.5	1.586	0.721	5676.4	3.6	0.659	1919.1	1964	10	7.21	196.4	977.313	54.4	11.9579	6.67771
Schneider Electric SE	FR007	France	2000	3.9	41315.5	628.9	1.034	0.073	465	0.3	0.074	1888.6	4878	10	0.73	65.7	1105	37	10.629	6.44397
Schneider Electric SE	FR007	France	2001	1.9	39765.4	594.4	1.008	0.137	529.6	0.7	0.15	1786.4	2494	10	1.37	66.9	921.84	34.5	10.5908	6.38755
Schneider Electric SE	FR007	France	2002	1.1	42551.8	654.6	1.045	0.097	570.4	0.5	0.103	1892.3	6576	10	0.97	65	1165.43	36.3	10.6585	6.48402
Schneider Electric SE	FR007	France	2003	0.8	49411.2	730.9	1.072	0.123	844.9	0.5	0.126	2369.7	3251	10	1.23	67.6	1248.97	38.6	10.8079	6.59428
Schneider Electric SE	FR007	France	2004	2.8	50105.1	865.4	1.099	0.124	822.5	0.6	0.112	2049.6	4835	10	1.24	57.9	1441.31	39	10.8219	6.76319
Schneider Electric SE	FR007	France	2005	1.7	51380	842.3	1.027	0.127	838.5	0.6	0.108	2217.5	5483	10	1.27	61	1428.31	42.5	10.847	6.73614
Schneider Electric SE	FR007	France	2006	2.4	54659.1	893.1	1.132	0.206	898.9	0.9	0.197	2242.2	3527	10	2.06	61.2	1634.46	40.1	10.9089	6.7947
Schneider Electric SE	FR007	France	2007	2.4	57419.3	965	1.087	0.167	817.2	0.9	0.178	2737.1	5814	10	1.67	59.5	1548.02	31.5	10.9581	6.87213
Schneider Electric SE	FR007	France	2008	-2.9	41308.5	630.7	1.126	0.224	775.4	1	0.233	1876.2	4007	10	2.24	65.5	1113.58	35.9	10.6288	6.44683
Schneider Electric SE	FR007	France	2009	1.5	61198.3	932.9	1.203	0.224	1204.7	1	0.204	2436.1	2767	10	2.24	65.6	1474.29	45.6	11.0219	6.8383
Schneider Electric SE	FR007	France	2010	2.1	67518.6	1110.5	1.172	0.234	1177.8	1.2	0.209	2538.6	5356	10	2.34	60.8	1951.92	37.7	11.1202	7.01257
Schneider Electric SE	FR007	France	2011	0.2	61597.8	1008.1	1.22	0.245	1050.3	1.2	0.254	2396	2484	10	2.45	61.1	1802.35	34.8	11.0284	6.91582
Schneider Electric SE	FR007	France	2012	0	66020.4	1006.4	1.216	0.315	1689.9	1.3	0.347	2620.3	8996	10	3.15	65.6	1670.35	39.6	11.0977	6.91413
Schneider Electric SE	FR007	France	2013	0.6	67574.9	1076	1.24	0.345	1598.3	1.6	0.321	2942.3	7024	10	3.45	62.8	1742.1	44.6	11.121	6.98101
Schneider Electric SE	FR007	France	2014	0.9	73800.2	1182.7	1.264	0.413	1914.4	1.8	0.402	2991.9	6931	10	4.13	62.4	2181.23	41.3	11.2091	7.07556
Schneider Electric SE	FR007	France	2015	1.1	77641.7	1350.3	1.328	0.398	1822.4	2.4	0.378	3642.2	8599	10	3.98	57.5	2093.18	49	11.2599	7.20808
Schneider Electric SE	FR007	France	2016	1.2	84170.3	1461.3	1.33	0.427	2411.7	2.3	0.488	3396.2	8185	10	4.27	57.6	2436.7	49.6	11.3406	7.28708
Schneider Electric SE	FR007	France	2017	2.4	101555	1543.4	1.31	0.438	2688	1.9	0.417	4340.4	7652	10	4.38	65.8	2683.58	42.2	11.5284	7.34174
Schneider Electric SE	FR007	France	2018	1.7	101969	1650	1.341	0.475	3026.5	2.2	0.41	4299.8	12985	10	4.75	61.8	2683.68	56.4	11.5324	7.40853
Schneider Electric SE	FR007	France	2019	1.5	97527.1	1754.1	1.411	0.479	2636.3	2.6	0.505	3789.6	9481	10	4.79	55.6	2819.01	52.4	11.4879	7.46971
Schneider Electric SE	FR007	France	2020	-7.9	33894.6	509.7	1.407	0.506	1115.4	2.5	0.525	1382.8	1956	10	5.06	66.5	789.392	53	10.431	6.23382
Schneider Electric SE	FR007	France	2021	6.8	208893	3607.8	1.461	0.584	5976.4	2.9	0.568	9951.8	22763	10	5.84	57.9	5790.09	47.9	12.2496	8.19085
Schneider Electric SE	FR007	France	2022	2.5	120771	2172.1	1.475	0.571	3477.7	2.9	0.549	5145.6	8869	10	5.71	55.6	3925.53	57.7	11.7017	7.68345
Schneider Electric SE	FR007	France	2023	0.8	116624	1937.3	1.453	0.654	4245.7	3	0.647	4714.4	5233	10	6.54	60.2	3483.87	55.3	11.6667	7.56905
Schneider Electric SE	FR007	France	2024	1.1	110626	1979	1.471	0.676	4670.2	3.9	0.64	4885	16495	10	6.76	55.9	3391.98	62.6	11.6139	7.59035
Schneider Electric SE	FR007	France	2025	0.9	121308	1860.6	1.523	0.712	5345.2	3.5	0.654	4815.8	12363	10	7.12	65.2	3300.17	47.2	11.7061	7.52865
Safran SA	FR008	France	2000	3.9	78847.2	620.4	0.961	0.066	928.8	0.3	0.075	4435.6	8872	10	0.66	127.1	988.149	31.7	11.2753	6.43036
Safran SA	FR008	France	2001	1.9	81742.1	692.7	1.012	0.082	927.2	0.3	0.076	4966.7	4420	10	0.82	118	1287.14	33	11.3113	6.5406
Safran SA	FR008	France	2002	1.1	81331.1	644.5	1.021	0.092	1045.6	0.4	0.085	5320.8	15434	10	0.92	126.2	1018.21	36.5	11.3063	6.46847
Safran SA	FR008	France	2003	0.8	84051	614	1.035	0.076	1032.2	0.3	0.067	5209.7	5104	10	0.76	136.9	976.259	21.6	11.3392	6.41999
Safran SA	FR008	France	2004	2.8	97828	759.5	1.084	0.106	1277.7	0.6	0.121	6017.8	19449	10	1.06	128.8	1208.08	42.4	11.491	6.63266
Safran SA	FR008	France	2005	1.7	96253.6	815.7	1.087	0.096	1401.3	0.5	0.104	5329.4	4551	10	0.96	118	1286.44	48.7	11.4747	6.70405
Safran SA	FR008	France	2006	2.4	106934	895.6	1.148	0.184	1713.2	1	0.196	7051.2	18314	10	1.84	119.4	1472.97	39.9	11.58	6.79749
Safran SA	FR008	France	2007	2.4	107722	893.2	1.168	0.168	1573.4	0.7	0.167	5693.5	4973	10	1.68	120.6	1618.57	47.4	11.5873	6.79481
Safran SA	FR008	France	2008	-2.9	87753.3	745.6	1.169	0.228	1517.7	1.2	0.241	5427.2	6228	10	2.28	117.7	1258.77	39.4	11.3823	6.61419
Safran SA	FR008	France	2009	1.5	117217	923	1.229	0.209	2348.8	0.8	0.195	6493.4	6635	10	2.09	127	1566.03	52.2	11.6718	6.82763
Safran SA	FR008	France	2010	2.1	125100	1031.3	1.225	0.198	2449.2	1.1	0.193	7204.5	20934	10	1.98	121.3	1769.41	40.9	11.7369	6.93858
Safran SA	FR008	France	2011	0.2	118942	1038.8	1.225	0.289	2211.4	1.2	0.251	7898.4	17763	10	2.89	114.5	1743.58	45.8	11.6864	6.94582
Safran SA	FR008	France	2012	0	112554	941.9	1.301	0.286	2632.2	1.3	0.285	7534	8739	10	2.86	119.5	1542.44	53	11.6312	6.8479
Safran SA	FR008	France	2013	0.6	128471	1072.4	1.27	0.366	3490.7	2.1	0.406	8131.5	9602	10	3.66	119.8	1731.11	43.3	11.7635	6.97765
Safran SA	FR008	France	2014	0.9	139031	1172.3	1.329	0.311	3229.6	1.4	0.269	8996	16612	10	3.11	118.6	1999.35	44.7	11.8425	7.06672
Safran SA	FR008	France	2015	1.1	153325	1214.9	1.305	0.355	3749.1	1.6	0.405	10705.3	21894	10	3.55	126.2	2105.08	47.5	11.9403	7.10242
Safran SA	FR008	France	2016	1.2	156196	1153.6	1.386	0.407	3953.9	2.3	0.417	10932.9	10725	10	4.07	135.4	2138.45	37.3	11.9589	7.05064
Safran SA	FR008	France	2017	2.4	178960	1575.4	1.378	0.44	4427.3	2	0.44	10004.6	25170	10	4.4	113.6	2650.11	46.1	12.0949	7.36226
Safran SA	FR008	France	2018	1.7	184905	1581.7	1.405	0.494	4998.3	2.4	0.525	11981.4	28114	10	4.94	116.9	2689.73	46.5	12.1276	7.36626
Safran SA	FR008	France	2019	1.5	180562	1463.2	1.448	0.499	5976.1	2.5	0.487	10772.3	19678	10	4.99	123.4	2279.64	52.2	12.1038	7.28838
Safran SA	FR008	France	2020	-7.9	65406.3	514.6	1.389	0.539	1825.9	2.2	0.519	4383.9	8680	10	5.39	127.1	950.402	45.3	11.0884	6.24339
Safran SA	FR008	France	2021	6.8	355829	2848.9	1.474	0.585	11230.8	3	0.666	23441.2	64405	10	5.85	124.9	4600.64	41.8	12.7822	7.95469
Safran SA	FR008	France	2022	2.5	216263	1663.6	1.454	0.596	7134.7	3.2	0.632	14423.4	45794	10	5.96	130	3037.64	50.2	12.2843	7.41674
Safran SA	FR008	France	2023	0.8	186926	1432.4	1.516	0.71	7419.3	3.2	0.812	10421.7	29841	10	7.1	130.5	2304.2	55	12.1385	7.26711
Safran SA	FR008	France	2024	1.1	221844	1631.2	1.57	0.685	9440.4	3.8	0.753	14274.1	22752	10	6.85	136	3043.78	71.6	12.3097	7.39707
Safran SA	FR008	France	2025	0.9	231451	1988.4	1.608	0.728	8649.6	4.3	0.745	14236.4	28691	10	7.28	116.4	3187.06	56.3	12.3521	7.59509
Thales Group	FR009	France	2000	3.9	18724.8	276.6	0.982	0.07	264.7	0.3	0.077	1429.1	3483	10	0.7	67.7	515.177	36.3	9.8376	5.62257
Thales Group	FR009	France	2001	1.9	18919.7	254	1.025	0.074	232.6	0.4	0.081	1712.8	5928	10	0.74	74.5	486.087	35.7	9.84796	5.53733
Thales Group	FR009	France	2002	1.1	19518	315.8	1.031	0.068	227.2	0.4	0.062	1934.7	6088	10	0.68	61.8	613.125	31.3	9.87909	5.75511
Thales Group	FR009	France	2003	0.8	19022.5	294.9	1.094	0.077	250.4	0.4	0.079	1476	2345	10	0.77	64.5	541.909	36.6	9.85338	5.68664
Thales Group	FR009	France	2004	2.8	22132.6	303.2	1.105	0.163	384.8	0.8	0.139	1688.9	5684	10	1.63	73	539.656	43	10.0048	5.71439
Thales Group	FR009	France	2005	1.7	22011.3	293.1	1.151	0.158	357.1	0.9	0.145	2021.4	3640	10	1.58	75.1	585.125	40.9	9.99931	5.68051
Thales Group	FR009	France	2006	2.4	24732.6	358.4	1.075	0.158	352.3	0.7	0.155	1974	1848	10	1.58	69	684.435	22.7	10.1159	5.88165
Thales Group	FR009	France	2007	2.4	26229.8	358.8	1.085	0.161	435.5	0.9	0.159	2605.9	3230	10	1.61	73.1	684.523	37.4	10.1747	5.88277
Thales Group	FR009	France	2008	-2.9	18470.8	269.6	1.186	0.23	387.4	1.3	0.231	1572.4	5404	10	2.3	68.5	549.644	41	9.82395	5.59694
Thales Group	FR009	France	2009	1.5	26852.6	410.6	1.141	0.237	535.8	1.4	0.229	2337.9	5374	10	2.37	65.4	851.346	40.3	10.1981	6.01762
Thales Group	FR009	France	2010	2.1	30124.4	477.4	1.151	0.26	523.4	1.4	0.29	2969.6	6734	10	2.6	63.1	891.342	50.6	10.3131	6.16835
Thales Group	FR009	France	2011	0.2	26843.9	359.4	1.19	0.265	601.3	1.2	0.27	2114.1	4617	10	2.65	74.7	655.234	46.2	10.1978	5.88444
Thales Group	FR009	France	2012	0	27694.6	425.4	1.269	0.335	609.6	2	0.304	2364.4	2888	10	3.35	65.1	826.127	43.5	10.229	6.05303
Thales Group	FR009	France	2013	0.6	29627.9	418.5	1.227	0.375	677.4	2.1	0.33	2225.9	6543	10	3.75	70.8	741.809	50	10.2965	6.03668
Thales Group	FR009	France	2014	0.9	31867	465.2	1.218	0.329	628.2	1.8	0.33	2947.4	8888	10	3.29	68.5	912.981	51.8	10.3693	6.14247
Thales Group	FR009	France	2015	1.1	33216.5	495.8	1.304	0.404	861.2	2.2	0.457	2478.4	6927	10	4.04	67	998.393	45	10.4108	6.20617
Thales Group	FR009	France	2016	1.2	33348.2	473.7	1.325	0.502	938	2.4	0.508	3095.2	6738	10	5.02	70.4	970.866	45	10.4148	6.16057
Thales Group	FR009	France	2017	2.4	41594.3	663.4	1.313	0.444	1271.7	2.3	0.492	3875.8	11471	10	4.44	62.7	1309.29	52.2	10.6357	6.49738
Thales Group	FR009	France	2018	1.7	39903.3	545.9	1.306	0.456	1260.2	2.6	0.435	3313.3	10377	10	4.56	73.1	1014.61	52.7	10.5942	6.30244
Thales Group	FR009	France	2019	1.5	39804	568.6	1.401	0.517	1314.9	2.7	0.478	3119.5	7641	10	5.17	70	1133.17	51	10.5917	6.34318
Thales Group	FR009	France	2020	-7.9	14431.9	220.3	1.405	0.533	465.3	3.2	0.459	1179	2701	10	5.33	65.5	412.753	61.3	9.5772	5.39499
Thales Group	FR009	France	2021	6.8	86915.4	1390.6	1.363	0.609	2947.9	2.5	0.547	7691.2	13130	10	6.09	62.5	2681.21	56.3	11.3727	7.23749
Thales Group	FR009	France	2022	2.5	56177.8	784.6	1.426	0.643	1914	3.5	0.615	4864.4	16520	10	6.43	71.6	1630.98	54.2	10.9363	6.66517
Thales Group	FR009	France	2023	0.8	42979.8	655.2	1.411	0.653	1732.1	3.2	0.692	3862.8	8403	10	6.53	65.6	1260.68	59.8	10.6685	6.48494
Thales Group	FR009	France	2024	1.1	52258.1	734	1.478	0.682	2185.4	3.8	0.603	4586.5	14226	10	6.82	71.2	1373.02	58.9	10.864	6.59851
Thales Group	FR009	France	2025	0.9	52568.2	811.2	1.463	0.676	2069.3	2.9	0.633	4783.1	9349	10	6.76	64.8	1654.81	57.1	10.8699	6.69851
Capgemini SE	FR010	France	2000	3.9	23513.5	94.3	0.982	0.026	250.6	0.1	0.025	1044.6	2224	10	0.26	249.3	201.994	41.8	10.0653	4.54648
Capgemini SE	FR010	France	2001	1.9	27058.3	111	0.998	0.019	293.6	0.1	0.018	1035.5	3162	10	0.19	243.8	204.159	37.1	10.2057	4.70953
Capgemini SE	FR010	France	2002	1.1	25784.3	91.1	1.069	0.026	271.2	0.1	0.024	956.3	1789	10	0.26	283.1	197.711	23.2	10.1575	4.51196
Capgemini SE	FR010	France	2003	0.8	27752.2	112.3	1.036	0.071	382.5	0.4	0.063	1341.5	3195	10	0.71	247.1	227.247	31.8	10.2311	4.72117
Capgemini SE	FR010	France	2004	2.8	30797.7	108.7	1.078	0.102	436.4	0.5	0.1	1223.3	4155	10	1.02	283.2	198.817	39	10.3352	4.68859
Capgemini SE	FR010	France	2005	1.7	30786.6	109.4	1.099	0.1	435.2	0.5	0.113	1443.8	3105	10	1	281.4	197.592	36.3	10.3348	4.69501
Capgemini SE	FR010	France	2006	2.4	31635.4	132.6	1.155	0.174	600.7	1	0.179	1339.2	3876	10	1.74	238.5	255.593	42.2	10.362	4.88734
Capgemini SE	FR010	France	2007	2.4	35805.2	133.8	1.136	0.137	484.4	0.5	0.121	1735.6	2164	10	1.37	267.6	262.095	45	10.4858	4.89635
Capgemini SE	FR010	France	2008	-2.9	27631.8	97.7	1.16	0.155	503.4	0.7	0.158	1228.7	3594	10	1.55	282.8	209.643	44.7	10.2267	4.5819
Capgemini SE	FR010	France	2009	1.5	34816.3	128.1	1.243	0.173	577.9	0.9	0.178	1528.2	4920	10	1.73	271.7	262.874	40	10.4578	4.85281
Capgemini SE	FR010	France	2010	2.1	36498.2	132.9	1.216	0.209	732.5	1.2	0.239	1575.7	4736	10	2.09	274.7	253.53	52	10.505	4.8896
Capgemini SE	FR010	France	2011	0.2	36508.1	136.6	1.251	0.247	678.8	1.2	0.21	1656.7	5552	10	2.47	267.3	260.184	46.4	10.5053	4.91706
Capgemini SE	FR010	France	2012	0	38163.9	143.9	1.265	0.283	786.1	1.3	0.262	1433.6	1496	10	2.83	265.2	305.126	42.5	10.5496	4.96912
Capgemini SE	FR010	France	2013	0.6	40416.2	161.9	1.261	0.312	1014	1.8	0.346	1853.1	6231	10	3.12	249.6	300.587	47.1	10.607	5.08698
Capgemini SE	FR010	France	2014	0.9	43268	172.5	1.307	0.356	1173.3	1.7	0.33	1789.6	2948	10	3.56	250.9	311.481	52	10.6752	5.1504
Capgemini SE	FR010	France	2015	1.1	44603	184.9	1.386	0.364	976.4	1.6	0.35	1822.9	6293	10	3.64	241.2	384.759	51.1	10.7056	5.21982
Capgemini SE	FR010	France	2016	1.2	49000.6	200.1	1.378	0.465	1223.1	2.5	0.529	1887.7	2712	10	4.65	244.9	378.12	45.7	10.7996	5.29882
Capgemini SE	FR010	France	2017	2.4	55817.5	205.3	1.409	0.43	1503.6	1.7	0.423	2694.2	4179	10	4.3	271.9	404.612	49.8	10.9298	5.32447
Capgemini SE	FR010	France	2018	1.7	57202.7	206.9	1.42	0.482	1498.6	2.1	0.508	2271.9	2947	10	4.82	276.5	420.295	47.7	10.9544	5.33224
Capgemini SE	FR010	France	2019	1.5	59831.8	247.1	1.434	0.525	1606.8	2.6	0.565	2853	7677	10	5.25	242.1	490.325	47.6	10.9993	5.50979
Capgemini SE	FR010	France	2020	-7.9	21051.3	77.5	1.48	0.501	675.3	2.2	0.505	918.7	1917	10	5.01	271.6	159.309	42.3	9.95472	4.35028
Capgemini SE	FR010	France	2021	6.8	120782	500.1	1.455	0.56	3391.5	3.3	0.485	4792.5	11243	10	5.6	241.5	1014.43	52	11.7017	6.21481
Capgemini SE	FR010	France	2022	2.5	72298.6	267.5	1.531	0.567	2494.5	2.7	0.598	3511.1	11732	10	5.67	270.3	568.181	54.4	11.1886	5.58912
Capgemini SE	FR010	France	2023	0.8	62170.1	248.2	1.553	0.649	1961.9	3.1	0.665	2989.8	8651	10	6.49	250.5	523.761	60.6	11.0376	5.51423
Capgemini SE	FR010	France	2024	1.1	69397.8	258.9	1.539	0.65	2480.6	3	0.588	2994.4	9882	10	6.5	268	563.886	49.9	11.1476	5.55644
Capgemini SE	FR010	France	2025	0.9	73141.9	285.4	1.598	0.751	2918.2	4	0.831	3092.2	9650	10	7.51	256.3	541.301	53.4	11.2002	5.65389
LVMH Group	FR011	France	2000	3.9	13130.8	427.7	1.024	0.098	196.8	0.6	0.09	186.3	392	10	0.98	30.7	1074.56	45.8	9.48272	6.05842
LVMH Group	FR011	France	2001	1.9	12918.1	437.9	1.033	0.139	207.4	0.7	0.148	216.3	364	10	1.39	29.5	1013.17	43.9	9.46638	6.08199
LVMH Group	FR011	France	2002	1.1	13164.7	435.9	1.046	0.104	193.6	0.5	0.102	186.6	353	10	1.04	30.2	1038.09	37.6	9.48529	6.07741
LVMH Group	FR011	France	2003	0.8	15081	562.7	1.017	0.147	203.6	0.8	0.134	242.5	216	10	1.47	26.8	1357.96	39.1	9.62119	6.33275
LVMH Group	FR011	France	2004	2.8	14733	501.1	1.014	0.196	295.9	1.1	0.202	238.5	735	10	1.96	29.4	1361.08	43.2	9.59785	6.21681
LVMH Group	FR011	France	2005	1.7	14723.7	485.9	1.096	0.133	259.1	0.6	0.115	220.3	189	10	1.33	30.3	1255.18	33	9.59721	6.186
LVMH Group	FR011	France	2006	2.4	17172.6	648	1.065	0.181	255.7	0.8	0.202	251.4	222	10	1.81	26.5	1498.13	31.5	9.75107	6.47389
LVMH Group	FR011	France	2007	2.4	17836.5	602.6	1.097	0.229	318.4	1.3	0.254	266.3	389	10	2.29	29.6	1386.92	41	9.789	6.40125
LVMH Group	FR011	France	2008	-2.9	13979	531.5	1.113	0.215	297.7	1.2	0.193	235.9	758	10	2.15	26.3	1324.6	44.8	9.54531	6.2757
LVMH Group	FR011	France	2009	1.5	19542.9	710.7	1.119	0.216	383.3	1.1	0.186	346.2	1167	10	2.16	27.5	1763.02	42.9	9.88037	6.56625
LVMH Group	FR011	France	2010	2.1	20192.5	664.2	1.168	0.269	443.3	1.1	0.283	343.1	614	10	2.69	30.4	1646.57	48.4	9.91307	6.49858
LVMH Group	FR011	France	2011	0.2	18402.7	705.1	1.207	0.296	442.8	1.4	0.312	272.6	470	10	2.96	26.1	1797.46	38.6	9.82025	6.55834
LVMH Group	FR011	France	2012	0	19345.8	671.7	1.241	0.331	467.9	1.4	0.32	275.5	361	10	3.31	28.8	1663.73	47.3	9.87023	6.50981
LVMH Group	FR011	France	2013	0.6	20479.2	734	1.179	0.393	555.8	2.3	0.348	329.9	1054	10	3.93	27.9	1877	43.9	9.92717	6.59851
LVMH Group	FR011	France	2014	0.9	22641.9	848	1.202	0.377	644.6	1.9	0.363	408.2	1290	10	3.77	26.7	2127.28	47.4	10.0276	6.74288
LVMH Group	FR011	France	2015	1.1	23909.4	888.8	1.166	0.408	714.8	2.2	0.446	360.6	319	10	4.08	26.9	2015.36	48	10.082	6.78987
LVMH Group	FR011	France	2016	1.2	25383.8	846.1	1.257	0.393	690.2	1.7	0.381	408.2	798	10	3.93	30	1961.32	42.3	10.1419	6.74064
LVMH Group	FR011	France	2017	2.4	31443.1	1099.4	1.292	0.46	785.7	2.7	0.437	467.3	1135	10	4.6	28.6	2885.84	46.2	10.3559	7.00252
LVMH Group	FR011	France	2018	1.7	27191.1	1070.5	1.311	0.541	740.8	2.4	0.505	419.2	676	10	5.41	25.4	2711.2	49.8	10.2106	6.97588
LVMH Group	FR011	France	2019	1.5	29479.3	1020	1.307	0.563	989	2.9	0.541	479.5	1012	10	5.63	28.9	2751.82	46.4	10.2914	6.92756
LVMH Group	FR011	France	2020	-7.9	9908.7	346.5	1.266	0.605	383.9	3	0.55	179	223	10	6.05	28.6	933.469	52.5	9.20117	5.84788
LVMH Group	FR011	France	2021	6.8	58712.3	2074.6	1.288	0.602	1810.9	3.6	0.629	909.2	2606	10	6.02	28.3	5375.36	46.2	10.9804	7.63752
LVMH Group	FR011	France	2022	2.5	35924.5	1247.4	1.342	0.622	1407.9	2.7	0.597	522.1	1326	10	6.22	28.8	3366.64	54.4	10.4892	7.12882
LVMH Group	FR011	France	2023	0.8	34102	1296.7	1.344	0.683	1357.2	2.9	0.708	630.6	1269	10	6.83	26.3	3498.38	46.8	10.4371	7.16758
LVMH Group	FR011	France	2024	1.1	34176.5	1319.6	1.328	0.644	1337.3	3.4	0.696	559	870	10	6.44	25.9	3244.46	61.6	10.4393	7.18508
LVMH Group	FR011	France	2025	0.9	32939.2	1098	1.388	0.693	1346.7	3.6	0.673	479.3	425	10	6.93	30	2826.66	59.6	10.4024	7.00125
L'Oréal SA	FR012	France	2000	3.9	14739.8	424.8	1.005	0.025	162	0.1	0.024	439.5	756	10	0.25	34.7	916.288	28.2	9.59831	6.05162
L'Oréal SA	FR012	France	2001	1.9	15356.5	430.2	1.001	0.076	186.9	0.4	0.07	485.2	1028	10	0.76	35.7	917.625	51.6	9.63929	6.06425
L'Oréal SA	FR012	France	2002	1.1	15108.5	428	1.034	0.045	204.7	0.2	0.042	472.3	700	10	0.45	35.3	862.603	43.9	9.62301	6.05912
L'Oréal SA	FR012	France	2003	0.8	16016.5	469.7	1.002	0.072	213.4	0.4	0.075	547	1219	10	0.72	34.1	930.264	27.8	9.68137	6.15209
L'Oréal SA	FR012	France	2004	2.8	18314.3	500.4	1.074	0.067	199.6	0.3	0.073	524.3	1171	10	0.67	36.6	1009.71	41.5	9.81544	6.21541
L'Oréal SA	FR012	France	2005	1.7	18020.1	470.5	1.058	0.026	216.2	0.1	0.026	573.6	1257	10	0.26	38.3	896.366	30.5	9.79924	6.1538
L'Oréal SA	FR012	France	2006	2.4	19021.8	576.4	1.09	0.17	315.4	0.9	0.192	637.8	745	10	1.7	33	1166.89	33.2	9.85334	6.3568
L'Oréal SA	FR012	France	2007	2.4	20708.7	585	1.061	0.091	246	0.4	0.088	727.7	1422	10	0.91	35.4	1182.6	44.6	9.93831	6.37161
L'Oréal SA	FR012	France	2008	-2.9	15787.4	487.3	1.075	0.152	239	0.9	0.133	523	1795	10	1.52	32.4	950.256	33.9	9.66697	6.18888
L'Oréal SA	FR012	France	2009	1.5	21719.4	611.8	1.123	0.163	385.6	0.8	0.175	766.5	1802	10	1.63	35.5	1297.22	39.3	9.98596	6.41641
L'Oréal SA	FR012	France	2010	2.1	22202.3	674.8	1.16	0.214	368.1	0.9	0.204	773.1	1953	10	2.14	32.9	1385.27	34.2	10.008	6.51442
L'Oréal SA	FR012	France	2011	0.2	23500.8	681.2	1.13	0.252	446.4	1.1	0.228	644.5	1825	10	2.52	34.5	1298.55	44.1	10.0648	6.52386
L'Oréal SA	FR012	France	2012	0	21056	589.8	1.206	0.267	491.5	1.5	0.23	557.7	1802	10	2.67	35.7	1085.42	43.1	9.95494	6.37978
L'Oréal SA	FR012	France	2013	0.6	23801.3	689.9	1.199	0.28	498.7	1.3	0.283	837.1	1780	10	2.8	34.5	1386.26	42	10.0775	6.53655
L'Oréal SA	FR012	France	2014	0.9	25303.3	658.9	1.216	0.323	627.4	1.7	0.314	697.6	2170	10	3.23	38.4	1258.64	47.8	10.1387	6.49057
L'Oréal SA	FR012	France	2015	1.1	28790.9	859.4	1.243	0.396	686.8	2	0.409	1009.7	1776	10	3.96	33.5	1712.07	47.7	10.2678	6.75623
L'Oréal SA	FR012	France	2016	1.2	28421.1	744	1.196	0.414	650.3	1.7	0.424	752.6	2175	10	4.14	38.2	1632.18	54.1	10.2549	6.61204
L'Oréal SA	FR012	France	2017	2.4	34028.9	986.3	1.237	0.397	887.7	2.3	0.411	977.8	3110	10	3.97	34.5	2149.2	52	10.435	6.89396
L'Oréal SA	FR012	France	2018	1.7	35513.5	1041.5	1.261	0.507	1219.1	2.4	0.582	935.2	1096	10	5.07	34.1	1916.8	53.2	10.4777	6.94842
L'Oréal SA	FR012	France	2019	1.5	36540.4	1074.7	1.241	0.496	1250.3	2.7	0.423	1071.4	2355	10	4.96	34	1978.06	54.3	10.5062	6.9798
L'Oréal SA	FR012	France	2020	-7.9	11164.5	321.7	1.304	0.563	409.6	3	0.554	373.7	1143	10	5.63	34.7	595.784	43.6	9.32049	5.77362
L'Oréal SA	FR012	France	2021	6.8	71095.5	2072.8	1.256	0.594	2674	3.1	0.562	1958.2	6800	10	5.94	34.3	4168.43	50.8	11.1718	7.63666
L'Oréal SA	FR012	France	2022	2.5	45754.8	1263.9	1.334	0.592	1630.9	3.3	0.512	1293.6	1212	10	5.92	36.2	2284.14	54.9	10.7311	7.14196
L'Oréal SA	FR012	France	2023	0.8	36422	1014.5	1.328	0.648	1368.9	3	0.65	972.2	1925	10	6.48	35.9	1843.82	55	10.5029	6.92215
L'Oréal SA	FR012	France	2024	1.1	41282.5	1258.6	1.359	0.657	1662.9	3.8	0.745	1159.6	1840	10	6.57	32.8	2694.01	52	10.6282	7.13776
L'Oréal SA	FR012	France	2025	0.9	42614.9	1214.1	1.281	0.757	1673.4	4.1	0.762	1163.1	3031	10	7.57	35.1	2373.19	61.1	10.66	7.10176
Sanofi SA	FR013	France	2000	3.9	12310.5	547.1	0.965	0.08	174.1	0.4	0.07	1168.7	2018	10	0.8	22.5	1381.19	30.4	9.41821	6.30463
Sanofi SA	FR013	France	2001	1.9	12985.7	669.4	1.035	0.074	178.5	0.3	0.064	1144.6	3948	10	0.74	19.4	1508.93	42.5	9.4716	6.50638
Sanofi SA	FR013	France	2002	1.1	12603.9	565.2	1.067	0.066	165.6	0.3	0.07	1172.9	1257	10	0.66	22.3	1342	39.2	9.44176	6.33718
Sanofi SA	FR013	France	2003	0.8	12601.7	588.9	1.058	0.136	181.8	0.7	0.144	1202.2	3044	10	1.36	21.4	1336.78	39.7	9.44159	6.37826
Sanofi SA	FR013	France	2004	2.8	14189.9	656.9	1.062	0.11	201.5	0.5	0.117	1575	2192	10	1.1	21.6	1691.49	30.1	9.56029	6.48753
Sanofi SA	FR013	France	2005	1.7	14096.1	726.6	1.089	0.126	234.7	0.7	0.115	1505.1	2267	10	1.26	19.4	1887.13	35.8	9.55365	6.58838
Sanofi SA	FR013	France	2006	2.4	16551.3	759.2	1.048	0.171	282.5	0.7	0.156	1607	1738	10	1.71	21.8	2018.34	37.6	9.71422	6.63227
Sanofi SA	FR013	France	2007	2.4	15844.7	754.5	1.062	0.165	290.1	0.9	0.152	1852.3	5749	10	1.65	21	1741.73	37.4	9.67059	6.62606
Sanofi SA	FR013	France	2008	-2.9	13241.4	627.6	1.086	0.192	234.7	1.1	0.192	1275.8	1502	10	1.92	21.1	1576.84	43.2	9.4911	6.4419
Sanofi SA	FR013	France	2009	1.5	17193.8	781.5	1.101	0.255	369.2	1.4	0.254	1611.5	4703	10	2.55	22	2146.06	45.5	9.7523	6.66122
Sanofi SA	FR013	France	2010	2.1	18389.8	905.9	1.106	0.242	376.5	1.1	0.255	2055.2	3435	10	2.42	20.3	2400.12	39.6	9.81955	6.80893
Sanofi SA	FR013	France	2011	0.2	18302.6	802.7	1.126	0.282	382.4	1.6	0.261	1744.7	4100	10	2.82	22.8	2071.83	40.5	9.8148	6.68798
Sanofi SA	FR013	France	2012	0	17489.9	878.9	1.148	0.27	357	1.1	0.253	1961.7	3811	10	2.7	19.9	2364.55	43.9	9.76938	6.77867
Sanofi SA	FR013	France	2013	0.6	19647.2	885	1.189	0.294	491.4	1.4	0.281	2153.2	6985	10	2.94	22.2	2040.5	37	9.88569	6.78559
Sanofi SA	FR013	France	2014	0.9	20930.9	1078.9	1.143	0.383	574.7	1.9	0.425	2469.8	6016	10	3.83	19.4	2434.93	52.5	9.94898	6.9837
Sanofi SA	FR013	France	2015	1.1	23545.8	1060.6	1.183	0.36	646	1.5	0.351	2397	7728	10	3.6	22.2	2622.68	49.7	10.0667	6.96659
Sanofi SA	FR013	France	2016	1.2	22368.2	1075.4	1.197	0.414	670.9	2.3	0.427	2651.5	7523	10	4.14	20.8	2598.3	45.7	10.0154	6.98045
Sanofi SA	FR013	France	2017	2.4	29735.1	1339.4	1.206	0.447	834.7	1.8	0.465	3177.7	2670	10	4.47	22.2	3352.58	41.9	10.3001	7.19998
Sanofi SA	FR013	France	2018	1.7	28005.8	1296.6	1.238	0.435	873	2.3	0.371	2710.6	8738	10	4.35	21.6	3142.66	43.9	10.2402	7.1675
Sanofi SA	FR013	France	2019	1.5	29033.4	1290.4	1.197	0.494	992.5	2.7	0.537	3436.4	10684	10	4.94	22.5	3419.19	41	10.2762	7.16271
Sanofi SA	FR013	France	2020	-7.9	9735.2	444.5	1.285	0.57	300.7	2.5	0.648	1091.2	2881	10	5.7	21.9	1053.37	60.6	9.1835	6.09695
Sanofi SA	FR013	France	2021	6.8	60996.5	3176.9	1.267	0.602	2017.3	2.6	0.537	6727.1	14960	10	6.02	19.2	7699.74	58.4	11.0186	8.06366
Sanofi SA	FR013	France	2022	2.5	35369.1	1586.1	1.277	0.604	1130.8	3.5	0.678	3947.3	7873	10	6.04	22.3	3619.38	46.8	10.4736	7.36903
Sanofi SA	FR013	France	2023	0.8	32124.6	1681.9	1.298	0.667	1193	3.6	0.578	3627.4	5125	10	6.67	19.1	4330.89	49.3	10.3774	7.42768
Sanofi SA	FR013	France	2024	1.1	32334.3	1600.7	1.311	0.701	1083.7	2.9	0.709	2889	3988	10	7.01	20.2	4103.37	51.1	10.3839	7.3782
Sanofi SA	FR013	France	2025	0.9	35792.5	1864.2	1.325	0.749	1391.9	3.3	0.663	3625.1	10033	10	7.49	19.2	4373.74	54.9	10.4855	7.53059
Orange SA	FR014	France	2000	3.9	70363.4	657	1.003	0.066	908	0.3	0.072	1933.8	1562	10	0.66	107.1	1587.07	30.6	11.1614	6.48768
Orange SA	FR014	France	2001	1.9	73997.1	637.9	1.045	0.113	957.7	0.6	0.109	1972	6142	10	1.13	116	1327.31	23.9	11.2118	6.45818
Orange SA	FR014	France	2002	1.1	75990.8	720.3	1.064	0.081	941.4	0.4	0.092	1943	6006	10	0.81	105.5	1474.88	29.5	11.2384	6.57967
Orange SA	FR014	France	2003	0.8	77023.6	676.2	1.044	0.108	1181.4	0.5	0.122	2202.7	2593	10	1.08	113.9	1462.43	37.1	11.2519	6.51649
Orange SA	FR014	France	2004	2.8	87111.2	773.6	1.063	0.171	1594.6	1	0.16	2509.1	3514	10	1.71	112.6	1747.05	36.9	11.3749	6.65105
Orange SA	FR014	France	2005	1.7	83323.5	862.6	1.106	0.197	1499.7	1.1	0.221	2010	3153	10	1.97	96.6	2025.77	41.4	11.3305	6.75995
Orange SA	FR014	France	2006	2.4	93189.1	834.3	1.151	0.153	1390.5	0.8	0.176	2195.5	2373	10	1.53	111.7	1856.34	46	11.4424	6.72659
Orange SA	FR014	France	2007	2.4	94732.1	957.9	1.138	0.183	1827.9	1.1	0.209	2234.3	7092	10	1.83	98.9	2157.58	35.5	11.4588	6.86474
Orange SA	FR014	France	2008	-2.9	77034.8	684.8	1.187	0.179	1240.1	1	0.19	2292.4	5598	10	1.79	112.5	1421.54	37.4	11.252	6.52913
Orange SA	FR014	France	2009	1.5	105828	1036.5	1.146	0.247	2297.1	1.3	0.21	2564.3	6398	10	2.47	102.1	2404.72	46.9	11.5696	6.9436
Orange SA	FR014	France	2010	2.1	118509	1040.5	1.237	0.201	2037.1	0.9	0.203	3330.5	8239	10	2.01	113.9	2420.45	43.3	11.6827	6.94746
Orange SA	FR014	France	2011	0.2	104688	967.5	1.225	0.265	2424	1.2	0.228	2712.8	7862	10	2.65	108.2	2060.94	47.8	11.5587	6.87472
Orange SA	FR014	France	2012	0	103337	1082.1	1.29	0.308	2318.2	1.8	0.344	2795.4	5688	10	3.08	95.5	2563.44	33.6	11.5458	6.98666
Orange SA	FR014	France	2013	0.6	110334	981.6	1.27	0.384	2628.9	2.2	0.355	2630.3	9205	10	3.84	112.4	1967.97	42.7	11.6113	6.88918
Orange SA	FR014	France	2014	0.9	125076	1254.5	1.28	0.334	2795.7	1.9	0.349	3453.5	11746	10	3.34	99.7	3028.11	52	11.7367	7.13449
Orange SA	FR014	France	2015	1.1	124897	1218.5	1.32	0.378	3269.2	2.2	0.411	3718.5	11925	10	3.78	102.5	2489.51	43.5	11.7352	7.10538
Orange SA	FR014	France	2016	1.2	135396	1274.9	1.321	0.445	3889	2.5	0.423	3973	4224	10	4.45	106.2	2655.01	40.9	11.816	7.15062
Orange SA	FR014	France	2017	2.4	159217	1411.5	1.365	0.484	5304.9	2.1	0.526	4569.2	5800	10	4.84	112.8	3265.88	48.6	11.978	7.25241
Orange SA	FR014	France	2018	1.7	157787	1574.7	1.341	0.496	4461.4	2.2	0.425	4088.1	8788	10	4.96	100.2	3175.17	44	11.969	7.36182
Orange SA	FR014	France	2019	1.5	172577	1532.7	1.367	0.511	4541.7	2.4	0.45	5156.5	4269	10	5.11	112.6	3276.45	50.1	12.0586	7.33479
Orange SA	FR014	France	2020	-7.9	56151.2	564.3	1.393	0.532	1902.9	3.1	0.53	1729.4	5925	10	5.32	99.5	1240.58	56.9	10.9358	6.33559
Orange SA	FR014	France	2021	6.8	331315	3025.7	1.443	0.58	10225.6	3.4	0.568	10273.8	17760	10	5.8	109.5	6835.92	60.1	12.7108	8.0149
Orange SA	FR014	France	2022	2.5	212166	1950.1	1.513	0.595	6956.7	3.3	0.622	5078.8	16322	10	5.95	108.8	4143	59.8	12.2651	7.57564
Orange SA	FR014	France	2023	0.8	175993	1531.7	1.508	0.599	5089.9	3.1	0.656	5400.4	5824	10	5.99	114.9	3506.55	53	12.0782	7.33413
Orange SA	FR014	France	2024	1.1	182351	1821.7	1.442	0.679	7427.3	3	0.599	5020.2	8486	10	6.79	100.1	4064.91	50.6	12.1137	7.50753
Orange SA	FR014	France	2025	0.9	188197	1720.3	1.554	0.682	7021.9	3.6	0.662	5434.2	16150	10	6.82	109.4	4111.75	50.7	12.1452	7.45025
Engie SA	FR015	France	2000	3.9	60312.5	1380.1	0.968	0.01	596.4	0	0.01	910.8	810	10	0.1	43.7	3724.16	36.9	11.0073	7.22991
Engie SA	FR015	France	2001	1.9	58788.7	1451.6	1.024	0.029	678.1	0.1	0.025	1016	2801	10	0.29	40.5	4438.28	39.7	10.9817	7.28042
Engie SA	FR015	France	2002	1.1	58863.7	1590.9	1.039	0.01	675.2	0	0.009	908.7	2460	10	0.1	37	4091.81	42	10.983	7.37206
Engie SA	FR015	France	2003	0.8	62967.3	1606.3	1.063	0.026	660.9	0.1	0.027	994.9	1821	10	0.26	39.2	4182.84	39.3	11.0504	7.38169
Engie SA	FR015	France	2004	2.8	71482.5	1685.9	1.072	0.065	1020.8	0.3	0.066	1305.2	2876	10	0.65	42.4	4981.61	38.4	11.1772	7.43005
Engie SA	FR015	France	2005	1.7	67094.6	1738.2	1.089	0.103	1041.1	0.6	0.11	954.2	2305	10	1.03	38.6	4959.88	30.4	11.1139	7.46061
Engie SA	FR015	France	2006	2.4	77904.7	1774.6	1.126	0.15	1189.8	0.7	0.148	1250.2	1420	10	1.5	43.9	5336.69	37.8	11.2632	7.48133
Engie SA	FR015	France	2007	2.4	83157.9	2028.2	1.142	0.123	1254.1	0.7	0.118	1379.6	2641	10	1.23	41	6120	38.5	11.3285	7.6149
Engie SA	FR015	France	2008	-2.9	57325.8	1288.2	1.167	0.13	808	0.6	0.127	812.9	1519	10	1.3	44.5	3628.4	47.4	10.9565	7.161
Engie SA	FR015	France	2009	1.5	78794.7	2041.3	1.222	0.172	1197.4	1	0.191	1215.3	1420	10	1.72	38.6	6268.61	48.2	11.2746	7.62134
Engie SA	FR015	France	2010	2.1	93358	2450.3	1.204	0.202	1876.9	1.1	0.181	1561.9	2164	10	2.02	38.1	6389.92	41.9	11.4442	7.80397
Engie SA	FR015	France	2011	0.2	76211	1886.4	1.215	0.219	1559.7	0.9	0.24	1146.3	2714	10	2.19	40.4	5425.61	44	11.2413	7.54243
Engie SA	FR015	France	2012	0	78151	2089.6	1.245	0.28	1532.4	1.6	0.294	1104.3	956	10	2.8	37.4	6178.54	42.5	11.2664	7.64473
Engie SA	FR015	France	2013	0.6	91665	2141.7	1.231	0.243	1984.3	1.2	0.246	1259.7	2632	10	2.43	42.8	6593.34	41.5	11.4259	7.66936
Engie SA	FR015	France	2014	0.9	103329	2425.6	1.335	0.339	2550.5	1.8	0.37	1690.6	4794	10	3.39	42.6	6258.98	48	11.5457	7.79383
Engie SA	FR015	France	2015	1.1	98373.2	2602.5	1.299	0.312	1939.2	1.6	0.287	1459.9	1691	10	3.12	37.8	7697.62	39.5	11.4965	7.86423
Engie SA	FR015	France	2016	1.2	106594	2467.5	1.328	0.398	2790.4	1.8	0.4	1464	4941	10	3.98	43.2	7090.1	48.4	11.5768	7.81096
Engie SA	FR015	France	2017	2.4	133386	3437.8	1.325	0.411	3167.1	1.7	0.399	2237.3	7468	10	4.11	38.8	10048	53.9	11.801	8.14259
Engie SA	FR015	France	2018	1.7	131573	3527.4	1.374	0.407	3482.5	2.4	0.389	2220.3	7691	10	4.07	37.3	9653	52.3	11.7873	8.16832
Engie SA	FR015	France	2019	1.5	130158	3262.1	1.392	0.505	4146.8	2.3	0.56	2290.7	3068	10	5.05	39.9	9648.85	49.2	11.7765	8.09013
Engie SA	FR015	France	2020	-7.9	41518.2	1048.4	1.363	0.556	1521.8	3.3	0.486	602.1	1836	10	5.56	39.6	2940.46	43	10.6339	6.95502
Engie SA	FR015	France	2021	6.8	272191	6574.7	1.408	0.593	9247.6	2.8	0.585	3771.7	12247	10	5.93	41.4	19815.3	51.3	12.5143	8.79098
Engie SA	FR015	France	2022	2.5	164450	3962.7	1.476	0.588	5425.2	3.3	0.555	3040.9	3636	10	5.88	41.5	11051.1	49.8	12.0104	8.28468
Engie SA	FR015	France	2023	0.8	135419	3247.5	1.439	0.632	4261.8	2.9	0.709	2067.3	2844	10	6.32	41.7	8769.6	42.5	11.8161	8.08564
Engie SA	FR015	France	2024	1.1	148893	3528.3	1.506	0.654	5990.7	3.3	0.706	2259.5	3794	10	6.54	42.2	10056.4	61.8	11.911	8.16857
Engie SA	FR015	France	2025	0.9	161257	4199.4	1.469	0.73	5620.9	3.3	0.797	2561.8	6394	10	7.3	38.4	11005.7	43.4	11.9908	8.3427
Veolia Environnement	FR016	France	2000	3.9	38013.6	1226.2	1.005	0.125	530.6	0.7	0.138	467.8	614	10	1.25	31	3373.39	32.5	10.5457	7.11168
Veolia Environnement	FR016	France	2001	1.9	39505.1	1357.6	1.032	0.079	575.8	0.4	0.079	502.3	647	10	0.79	29.1	3428.16	33	10.5842	7.21347
Veolia Environnement	FR016	France	2002	1.1	40571.4	1548.5	0.99	0.074	502.4	0.4	0.081	618	1522	10	0.74	26.2	3933.25	38.8	10.6108	7.34504
Veolia Environnement	FR016	France	2003	0.8	41020.5	1530.6	1.059	0.109	520.3	0.5	0.098	514.3	1565	10	1.09	26.8	4288.65	35.8	10.6218	7.33342
Veolia Environnement	FR016	France	2004	2.8	51088.8	1824.6	1.079	0.146	893.6	0.8	0.161	632.7	1150	10	1.46	28	4914.93	35.9	10.8413	7.50912
Veolia Environnement	FR016	France	2005	1.7	49370.6	1795.3	1.087	0.164	806.9	0.9	0.167	647.9	1360	10	1.64	27.5	5242.67	38.8	10.8071	7.49293
Veolia Environnement	FR016	France	2006	2.4	47658	1626.6	1.115	0.163	798.5	0.7	0.159	606.2	980	10	1.63	29.3	4506.43	39.3	10.7718	7.39425
Veolia Environnement	FR016	France	2007	2.4	52806.6	1725.7	1.1	0.197	1011.2	0.9	0.216	621.1	617	10	1.97	30.6	5284.26	37.1	10.8744	7.45339
Veolia Environnement	FR016	France	2008	-2.9	43090	1394.5	1.161	0.17	812.8	1	0.179	621.9	1495	10	1.7	30.9	4181.98	41.4	10.671	7.24029
Veolia Environnement	FR016	France	2009	1.5	53761.2	1792	1.161	0.261	1193.6	1.4	0.292	790.2	1385	10	2.61	30	5315.45	42.1	10.8923	7.49109
Veolia Environnement	FR016	France	2010	2.1	64323.8	2225.7	1.126	0.254	1479.3	1.4	0.238	793.1	1527	10	2.54	28.9	6572.73	40.8	11.0717	7.70783
Veolia Environnement	FR016	France	2011	0.2	55017.3	1903.7	1.158	0.291	1144.9	1.6	0.254	739.8	1595	10	2.91	28.9	5167.35	42.3	10.9154	7.55155
Veolia Environnement	FR016	France	2012	0	57256.1	2030.4	1.137	0.312	1125.4	1.5	0.329	725.7	1466	10	3.12	28.2	6019.9	44.1	10.9553	7.61599
Veolia Environnement	FR016	France	2013	0.6	58631.6	2155.6	1.196	0.331	1274.9	1.7	0.339	769.1	1897	10	3.31	27.2	6428.89	42.7	10.979	7.67582
Veolia Environnement	FR016	France	2014	0.9	65394.4	2386.7	1.182	0.369	1650.4	2	0.39	960.7	2657	10	3.69	27.4	6954.39	44.6	11.0882	7.77767
Veolia Environnement	FR016	France	2015	1.1	70386.8	2427.1	1.228	0.374	1852.4	1.9	0.35	989.8	1211	10	3.74	29	6619.44	46.5	11.1618	7.79445
Veolia Environnement	FR016	France	2016	1.2	75536.3	2436.7	1.183	0.441	2358	2.2	0.505	973.2	1535	10	4.41	31	6141.15	43.7	11.2324	7.7984
Veolia Environnement	FR016	France	2017	2.4	97335.1	3244.5	1.207	0.39	2608	1.8	0.447	1280.3	1866	10	3.9	30	8216.92	45.7	11.4859	8.08472
Veolia Environnement	FR016	France	2018	1.7	90751.5	2965.7	1.287	0.452	2449.9	2	0.427	1067.9	2837	10	4.52	30.6	8509.75	46.7	11.4159	7.99487
Veolia Environnement	FR016	France	2019	1.5	93491.9	3315.3	1.296	0.516	2683.1	2.6	0.533	1277.7	3908	10	5.16	28.2	8784	47.3	11.4456	8.1063
Veolia Environnement	FR016	France	2020	-7.9	31897.5	1070.4	1.259	0.537	1084.2	2.9	0.575	475.3	1100	10	5.37	29.8	3081.77	45.9	10.3703	6.97579
Veolia Environnement	FR016	France	2021	6.8	188468	6432.3	1.328	0.576	6254.3	3	0.637	2481.8	3602	10	5.76	29.3	18601.3	49.1	12.1467	8.76909
Veolia Environnement	FR016	France	2022	2.5	123068	4592.1	1.334	0.606	3858.1	3.5	0.617	1638.9	2618	10	6.06	26.8	12908.4	51.3	11.7205	8.43209
Veolia Environnement	FR016	France	2023	0.8	98029.4	3564.7	1.363	0.663	3728.7	3.4	0.732	1408.9	3253	10	6.63	27.5	10065.9	50.1	11.493	8.17884
Veolia Environnement	FR016	France	2024	1.1	113264	3738.1	1.359	0.671	4256.9	3.6	0.595	1513.3	5187	10	6.71	30.3	10352.7	49.3	11.6375	8.22633
Veolia Environnement	FR016	France	2025	0.9	116127	3832.6	1.382	0.717	4080.7	3	0.819	1574.7	1820	10	7.17	30.3	11613.4	44.7	11.6624	8.2513
BNP Paribas SA	FR017	France	2000	3.9	64885.3	519.5	1.025	0.016	767.4	0.1	0.014	581	1014	9.3	0.1488	124.9	5874.77	36	11.0804	6.25287
BNP Paribas SA	FR017	France	2001	1.9	58255.8	475.2	1.02	0.093	774.5	0.5	0.087	499.9	1214	8.8	0.8184	122.6	5278.71	33.9	10.9726	6.16374
BNP Paribas SA	FR017	France	2002	1.1	65457.8	601.1	1.075	0.07	890.4	0.3	0.064	502.9	595	8.2	0.574	108.9	6793.06	40.1	11.0892	6.39876
BNP Paribas SA	FR017	France	2003	0.8	70332.6	612.1	1.066	0.117	1153.1	0.5	0.101	606.3	911	9	1.053	114.9	7091.77	30.3	11.161	6.4169
BNP Paribas SA	FR017	France	2004	2.8	79304	666.4	1.114	0.084	1125.7	0.4	0.083	627.7	1300	8.9	0.7476	119	8150.61	37	11.281	6.50189
BNP Paribas SA	FR017	France	2005	1.7	73172.6	647.5	1.139	0.146	1278.4	0.8	0.154	595	1750	8.7	1.2702	113	7611.95	34.9	11.2006	6.47312
BNP Paribas SA	FR017	France	2006	2.4	84596.8	703.2	1.138	0.164	1354.6	0.7	0.143	723.1	2176	8.4	1.3776	120.3	8647.45	43.2	11.3457	6.55564
BNP Paribas SA	FR017	France	2007	2.4	86707	709.5	1.119	0.189	1313.8	1	0.191	696.3	636	7.9	1.4931	122.2	8187.85	40.3	11.3703	6.56456
BNP Paribas SA	FR017	France	2008	-2.9	66427	638.1	1.23	0.199	1241	1.2	0.177	526.4	1104	8.7	1.7313	104.1	7421.72	43.4	11.1039	6.4585
BNP Paribas SA	FR017	France	2009	1.5	87851.2	705.1	1.243	0.225	1508.9	1.3	0.193	892.1	2498	10	2.25	124.6	8546.6	48.9	11.3834	6.55834
BNP Paribas SA	FR017	France	2010	2.1	93838.6	769.8	1.198	0.257	1892.9	1.2	0.247	808.6	1760	9.4	2.4158	121.9	10080.9	44.1	11.4493	6.64613
BNP Paribas SA	FR017	France	2011	0.2	86757.6	744.7	1.268	0.268	1794.3	1.4	0.255	878.9	1737	10	2.68	116.5	8644.21	49.4	11.3709	6.61298
BNP Paribas SA	FR017	France	2012	0	96178.4	845.2	1.266	0.32	2064.9	1.9	0.333	915.6	2705	10	3.2	113.8	9370.68	45.4	11.474	6.73957
BNP Paribas SA	FR017	France	2013	0.6	106694	870.3	1.289	0.319	2430.7	1.8	0.349	990.4	1697	10	3.19	122.6	10496.3	34.5	11.5777	6.76884
BNP Paribas SA	FR017	France	2014	0.9	108225	944.4	1.332	0.38	2625.2	2.1	0.35	976	1489	10	3.8	114.6	12360.8	48.8	11.592	6.85055
BNP Paribas SA	FR017	France	2015	1.1	113527	986.3	1.344	0.415	3134.9	2.1	0.457	1120.8	3837	10	4.15	115.1	12384.1	43.6	11.6398	6.89396
BNP Paribas SA	FR017	France	2016	1.2	121001	1000.8	1.377	0.371	2615.1	1.7	0.354	1005.1	2974	10	3.71	120.9	12063.1	43.3	11.7036	6.90855
BNP Paribas SA	FR017	France	2017	2.4	140796	1330.8	1.398	0.454	4217.2	2.6	0.428	1212.2	3425	10	4.54	105.8	16585.9	54.8	11.8551	7.19354
BNP Paribas SA	FR017	France	2018	1.7	133280	1200.7	1.408	0.473	3920	2.1	0.452	1152.9	1224	10	4.73	111	15784.2	52.4	11.8002	7.09066
BNP Paribas SA	FR017	France	2019	1.5	137811	1133.3	1.433	0.538	4038.2	3	0.528	1197.9	3122	10	5.38	121.6	13189.5	45.8	11.8336	7.03289
BNP Paribas SA	FR017	France	2020	-7.9	48759	419.6	1.462	0.56	1654.5	2.3	0.62	393.7	361	8.9	4.984	116.2	4785.49	61.1	10.7946	6.0393
BNP Paribas SA	FR017	France	2021	6.8	270799	2166.4	1.501	0.615	10675	3.7	0.675	2268.8	6776	10	6.15	125	26971.9	54.6	12.5091	7.68082
BNP Paribas SA	FR017	France	2022	2.5	174089	1555.8	1.524	0.628	6622.9	3.5	0.659	1725	3470	10	6.28	111.9	20278.9	54.6	12.0673	7.34975
BNP Paribas SA	FR017	France	2023	0.8	157297	1398.2	1.508	0.647	5102.4	3.2	0.612	1453	1813	10	6.47	112.5	16350	59.8	11.9659	7.24294
BNP Paribas SA	FR017	France	2024	1.1	180514	1533.7	1.535	0.686	6462	4	0.727	1632	2664	10	6.86	117.7	19068.2	50	12.1036	7.33544
BNP Paribas SA	FR017	France	2025	0.9	162028	1486.5	1.589	0.718	5889.8	3	0.704	1665.1	4216	10	7.18	109	18992.3	51.1	11.9955	7.30418
AXA Group	FR018	France	2000	3.9	172892	1465.2	0.989	0.037	1929.6	0.2	0.039	2557.3	7952	10	0.37	118	12402.9	34.8	12.0604	7.28975
AXA Group	FR018	France	2001	1.9	173960	1561.6	0.996	0.12	2893.1	0.5	0.109	2132	3557	10	1.2	111.4	11502	29.3	12.0666	7.35347
AXA Group	FR018	France	2002	1.1	160806	1502.9	1.055	0.148	2182.3	0.9	0.167	2318.8	7306	10	1.48	107	12382.1	32.2	11.988	7.31515
AXA Group	FR018	France	2003	0.8	172855	1440.5	1.05	0.068	2193.8	0.4	0.074	2690.4	7519	10	0.68	120	11212.1	43.7	12.0602	7.27275
AXA Group	FR018	France	2004	2.8	198609	1915.2	1.136	0.126	3223.2	0.7	0.127	3098.3	3304	10	1.26	103.7	14162.7	42	12.1991	7.55758
AXA Group	FR018	France	2005	1.7	215953	2150.9	1.127	0.143	3638.9	0.8	0.122	2971.9	8974	10	1.43	100.4	16872.8	39.6	12.2828	7.67364
AXA Group	FR018	France	2006	2.4	234580	2249.1	1.139	0.131	3445.7	0.6	0.143	3089.1	3986	10	1.31	104.3	16265	32.3	12.3655	7.71829
AXA Group	FR018	France	2007	2.4	236999	2221.2	1.168	0.233	5123.3	1.3	0.251	3214.9	4716	10	2.33	106.7	16209.1	42.2	12.3758	7.7058
AXA Group	FR018	France	2008	-2.9	194332	1722.8	1.164	0.198	3435.6	1.1	0.179	2679	3354	10	1.98	112.8	15114.2	37.1	12.1773	7.45171
AXA Group	FR018	France	2009	1.5	234693	1933.2	1.21	0.225	4776.3	1.2	0.245	2891.7	6589	10	2.25	121.4	13939.4	45	12.366	7.56693
AXA Group	FR018	France	2010	2.1	281646	2742.4	1.246	0.244	6155	1.3	0.234	4003.3	12191	10	2.44	102.7	20417.3	44.8	12.5484	7.91659
AXA Group	FR018	France	2011	0.2	236383	2356.8	1.285	0.281	5465.7	1.3	0.256	2772.9	5442	10	2.81	100.3	19510.5	49	12.3732	7.76506
AXA Group	FR018	France	2012	0	253438	2149.6	1.303	0.296	4797.5	1.5	0.256	3460	9985	10	2.96	117.9	18718.6	41.3	12.4429	7.67304
AXA Group	FR018	France	2013	0.6	260407	2506.3	1.307	0.327	5885	1.9	0.362	3349.6	3880	10	3.27	103.9	21426.7	46	12.47	7.82656
AXA Group	FR018	France	2014	0.9	305354	2897.1	1.304	0.341	6976.8	1.4	0.299	3630.5	11462	10	3.41	105.4	21710.4	42.7	12.6292	7.97147
AXA Group	FR018	France	2015	1.1	315402	3150.9	1.364	0.37	7315.7	2	0.328	3723.9	5197	10	3.7	100.1	27614.1	47.4	12.6616	8.05544
AXA Group	FR018	France	2016	1.2	337738	3075.9	1.435	0.422	10049	2.3	0.435	4070.1	10528	10	4.22	109.8	23467.3	39	12.73	8.03135
AXA Group	FR018	France	2017	2.4	382155	3195.3	1.368	0.434	10730.9	2.6	0.44	5596.5	11087	10	4.34	119.6	27635.8	51.3	12.8536	8.06944
AXA Group	FR018	France	2018	1.7	371915	3708	1.436	0.475	9604.3	2.5	0.532	4626.1	4054	10	4.75	100.3	29170.2	47.4	12.8264	8.21825
AXA Group	FR018	France	2019	1.5	389714	3761.7	1.483	0.515	10443.7	3	0.524	6133.8	10256	10	5.15	103.6	28930.3	51.3	12.8732	8.23263
AXA Group	FR018	France	2020	-7.9	134077	1230.1	1.494	0.534	3680.5	2.4	0.57	1835.5	4729	10	5.34	109	10082.1	47.5	11.8062	7.11485
AXA Group	FR018	France	2021	6.8	864421	7649.7	1.483	0.617	29918.5	2.8	0.584	12964.8	20256	10	6.17	113	64222.2	54.7	13.6698	8.94242
AXA Group	FR018	France	2022	2.5	535960	4515.3	1.532	0.61	17482.4	3.6	0.574	8201.4	7382	10	6.1	118.7	36607.4	47.3	13.1918	8.41523
AXA Group	FR018	France	2023	0.8	435619	3691.7	1.546	0.63	13455.3	3.4	0.612	6619.6	15755	10	6.3	118	27706.1	53.2	12.9845	8.21384
AXA Group	FR018	France	2024	1.1	464067	4024.9	1.575	0.663	17379.5	2.7	0.648	6278.2	19708	10	6.63	115.3	30738.7	61.9	13.0478	8.30026
AXA Group	FR018	France	2025	0.9	458049	3891.7	1.602	0.708	19151.9	3.5	0.812	6377.3	19934	10	7.08	117.7	30169.1	51.7	13.0347	8.2666
Vinci SA	FR019	France	2000	3.9	55094.6	300.7	0.964	0.077	619	0.4	0.071	721.3	1632	10	0.77	183.2	376.101	20.4	10.9168	5.70611
Vinci SA	FR019	France	2001	1.9	54334.5	250	1.025	0.133	931	0.7	0.133	655.6	2011	10	1.33	217.3	276.317	31.4	10.9029	5.52146
Vinci SA	FR019	France	2002	1.1	57817.3	282.3	1.041	0.109	872	0.6	0.108	667.7	2085	10	1.09	204.8	359.333	32.4	10.965	5.64297
Vinci SA	FR019	France	2003	0.8	56223	264.8	1.099	0.126	901.9	0.5	0.144	690.5	2415	10	1.26	212.3	334.241	50.7	10.9371	5.57897
Vinci SA	FR019	France	2004	2.8	62023.6	322.5	1.067	0.136	939.2	0.8	0.131	767.8	1303	10	1.36	192.3	404.975	39.3	11.0353	5.7761
Vinci SA	FR019	France	2005	1.7	61097.4	288.3	1.131	0.159	976.4	0.9	0.145	608.3	1344	10	1.59	211.9	363.417	37.7	11.0202	5.664
Vinci SA	FR019	France	2006	2.4	68726.6	368.9	1.106	0.233	1367.8	1.3	0.26	729.7	2131	10	2.33	186.3	419.785	45	11.1379	5.91053
Vinci SA	FR019	France	2007	2.4	78700.6	402.6	1.141	0.21	1262	1	0.181	780.9	1332	9.9	2.079	195.5	509.581	49.9	11.2734	5.99794
Vinci SA	FR019	France	2008	-2.9	59042.8	328.2	1.185	0.228	973.8	1.2	0.228	680.3	2085	10	2.28	179.9	404.985	42.2	10.986	5.79362
Vinci SA	FR019	France	2009	1.5	76802.5	385.6	1.254	0.244	1352.1	1.4	0.207	963.3	1772	10	2.44	199.2	507.359	41.2	11.249	5.9548
Vinci SA	FR019	France	2010	2.1	86735.5	449.6	1.245	0.273	1826.3	1.5	0.31	904.1	1504	10	2.73	192.9	514.23	44.5	11.3706	6.10836
Vinci SA	FR019	France	2011	0.2	78768.9	389.9	1.244	0.323	1627.7	1.3	0.343	833.7	2902	10	3.23	202	437.228	48.2	11.2743	5.96589
Vinci SA	FR019	France	2012	0	83473.1	382.9	1.301	0.291	1752.3	1.4	0.317	827.5	2418	10	2.91	218	485.399	47.1	11.3323	5.94777
Vinci SA	FR019	France	2013	0.6	81346.6	454.5	1.305	0.344	1940.2	2	0.333	868.1	2846	10	3.44	179	503.822	44.1	11.3065	6.1192
Vinci SA	FR019	France	2014	0.9	88620.6	448	1.338	0.424	2144	2.3	0.398	900.2	2022	10	4.24	197.8	493.16	54.9	11.3921	6.10479
Vinci SA	FR019	France	2015	1.1	104538	482.4	1.38	0.364	2669.8	1.7	0.331	1340	2759	10	3.64	216.7	555.367	52.4	11.5573	6.17877
Vinci SA	FR019	France	2016	1.2	109972	509.1	1.343	0.445	2847.5	2.2	0.396	1097.7	3701	10	4.45	216	617.997	52.2	11.608	6.23264
Vinci SA	FR019	France	2017	2.4	122362	589.7	1.418	0.467	3207.1	2.5	0.489	1538.4	2958	10	4.67	207.5	776.922	55.8	11.7147	6.37961
Vinci SA	FR019	France	2018	1.7	113843	587.4	1.408	0.521	3361.2	2.6	0.589	1398.4	4432	10	5.21	193.8	730.845	44.8	11.6426	6.37571
Vinci SA	FR019	France	2019	1.5	120779	617.8	1.465	0.49	3973.5	2.1	0.509	1252.3	2018	10	4.9	195.5	778.014	49.1	11.7017	6.42616
Vinci SA	FR019	France	2020	-7.9	41078.7	229.4	1.506	0.573	1265.6	2.3	0.535	542.1	822	10	5.73	179.1	277.151	49.9	10.6232	5.43547
Vinci SA	FR019	France	2021	6.8	257324	1182.6	1.5	0.614	7955.4	2.8	0.669	2859.4	2673	10	6.14	217.6	1381.64	53.4	12.4581	7.07547
Vinci SA	FR019	France	2022	2.5	154468	812.6	1.519	0.648	6020.3	2.6	0.743	1784	2996	10	6.48	190.1	1040.25	59.5	11.9477	6.70024
Vinci SA	FR019	France	2023	0.8	135436	636.7	1.588	0.696	5096.9	3.8	0.718	1375.6	2706	10	6.96	212.7	801.43	61.1	11.8163	6.4563
Vinci SA	FR019	France	2024	1.1	142086	768.9	1.553	0.683	5010.5	2.9	0.683	1661.2	5069	10	6.83	184.8	997.851	57.7	11.8642	6.64496
Vinci SA	FR019	France	2025	0.9	145588	752	1.559	0.713	6097.8	4.2	0.804	1803.8	2636	10	7.13	193.6	974.336	55.6	11.8885	6.62274
Dassault Aviation SA	FR020	France	2000	3.9	76473.8	654.7	0.993	0.015	912.3	0.1	0.016	5264.6	8331	10	0.15	116.8	1058.23	31.5	11.2447	6.48418
Dassault Aviation SA	FR020	France	2001	1.9	76296.4	650.4	1.019	0.078	1015.8	0.4	0.067	5350.5	8306	10	0.78	117.3	1121.12	36.5	11.2424	6.47759
Dassault Aviation SA	FR020	France	2002	1.1	85358.6	680.7	1.066	0.055	1084.8	0.3	0.047	5517	17797	10	0.55	125.4	1154.39	43.6	11.3546	6.52312
Dassault Aviation SA	FR020	France	2003	0.8	85570.7	633.9	1.082	0.068	1075.6	0.4	0.071	4672.1	4646	10	0.68	135	975.307	37.2	11.3571	6.45189
Dassault Aviation SA	FR020	France	2004	2.8	92301.7	725.6	1.054	0.114	1372.7	0.5	0.117	6400.3	16414	10	1.14	127.2	1115.2	33.5	11.4328	6.587
Dassault Aviation SA	FR020	France	2005	1.7	95416.6	831.2	1.143	0.133	1435.9	0.6	0.116	6065.9	7441	10	1.33	114.8	1502.64	44.6	11.466	6.72287
Dassault Aviation SA	FR020	France	2006	2.4	106875	878.9	1.19	0.167	1599.7	1	0.179	6303.8	15336	10	1.67	121.6	1567.63	44.2	11.5794	6.77867
Dassault Aviation SA	FR020	France	2007	2.4	107870	789.1	1.167	0.173	1764.1	0.9	0.183	7152.3	15507	10	1.73	136.7	1367.94	42.1	11.5887	6.67089
Dassault Aviation SA	FR020	France	2008	-2.9	84777.8	734.6	1.146	0.175	1343.5	0.9	0.194	5190	14159	10	1.75	115.4	1370.2	37.6	11.3478	6.59933
Dassault Aviation SA	FR020	France	2009	1.5	108369	794.5	1.187	0.241	2330.7	1.1	0.256	6363	15091	10	2.41	136.4	1257.39	37.5	11.5933	6.67771
Dassault Aviation SA	FR020	France	2010	2.1	123316	902.1	1.21	0.247	2084.4	1.2	0.251	8733.7	8227	10	2.47	136.7	1441.11	40.8	11.7225	6.80473
Dassault Aviation SA	FR020	France	2011	0.2	110490	816	1.264	0.279	2564.3	1.7	0.262	6721.7	6785	10	2.79	135.4	1394.87	39.9	11.6127	6.70441
Dassault Aviation SA	FR020	France	2012	0	120346	889.5	1.283	0.296	2286.6	1.3	0.275	7695.7	25382	10	2.96	135.3	1436.32	47.9	11.6981	6.79066
Dassault Aviation SA	FR020	France	2013	0.6	135928	1064.4	1.306	0.321	3154.5	1.9	0.3	8104.7	18861	10	3.21	127.7	1781.52	41.3	11.8199	6.97017
Dassault Aviation SA	FR020	France	2014	0.9	133179	968.6	1.317	0.322	2685	1.5	0.366	8340.7	11777	10	3.22	137.5	1493.26	42.3	11.7995	6.87585
Dassault Aviation SA	FR020	France	2015	1.1	141411	1045.9	1.367	0.409	3936.3	2	0.406	9353.9	22359	10	4.09	135.2	1874.56	39.7	11.8594	6.95263
Dassault Aviation SA	FR020	France	2016	1.2	151288	1188.4	1.352	0.428	4001.8	1.8	0.395	8061.2	9841	10	4.28	127.3	2212.51	46.5	11.9269	7.08036
Dassault Aviation SA	FR020	France	2017	2.4	180034	1462.5	1.35	0.441	4449.2	2.1	0.465	10335.1	13911	10	4.41	123.1	2577.23	48.2	12.1009	7.2879
Dassault Aviation SA	FR020	France	2018	1.7	189361	1615.7	1.388	0.481	6274.2	2.3	0.449	12080.4	26777	10	4.81	117.2	2846.69	49.3	12.1514	7.38752
Dassault Aviation SA	FR020	France	2019	1.5	183116	1423.9	1.437	0.503	4922.8	2.8	0.486	12613.6	34855	10	5.03	128.6	2377.66	46	12.1179	7.26115
Dassault Aviation SA	FR020	France	2020	-7.9	57296.7	486	1.409	0.586	1863.5	2.9	0.59	3804.8	5046	10	5.86	117.9	794.747	49.6	10.956	6.18621
Dassault Aviation SA	FR020	France	2021	6.8	368572	2972.4	1.415	0.551	11801.6	2.7	0.517	22178.3	72745	10	5.51	124	4645.07	58.2	12.8174	7.99712
Dassault Aviation SA	FR020	France	2022	2.5	227689	1651.1	1.558	0.622	8643.4	3.1	0.706	12156	28014	10	6.22	137.9	3070.66	47.7	12.3357	7.4092
Dassault Aviation SA	FR020	France	2023	0.8	209243	1686.1	1.541	0.66	8497.8	3.2	0.653	11609.7	27938	10	6.6	124.1	2701.42	49.5	12.2513	7.43017
Dassault Aviation SA	FR020	France	2024	1.1	211047	1553	1.547	0.662	8115.1	3.7	0.715	11499.3	27937	10	6.62	135.9	2765.06	48.8	12.2598	7.34794
Dassault Aviation SA	FR020	France	2025	0.9	214267	1858.3	1.568	0.692	8433.1	3	0.649	13092.9	35015	10	6.92	115.3	3253.66	61.5	12.275	7.52742
Sodexo SA	FR021	France	2000	3.9	12739.2	566.2	1.056	0.088	156.9	0.5	0.099	417.1	1406	10	0.88	22.5	1156.59	35.5	9.45244	6.33895
Sodexo SA	FR021	France	2001	1.9	11538.5	515.1	1.047	0.103	169.2	0.6	0.112	391.1	419	10	1.03	22.4	1010.4	34.6	9.35344	6.24436
Sodexo SA	FR021	France	2002	1.1	12263.4	502.6	1.05	0.107	156.6	0.5	0.11	358.8	717	10	1.07	24.4	951.098	31.6	9.41437	6.21979
Sodexo SA	FR021	France	2003	0.8	13538.3	654	1.112	0.106	178.3	0.6	0.119	388.3	1355	10	1.06	20.7	1194.88	38.9	9.51328	6.48311
Sodexo SA	FR021	France	2004	2.8	15373.5	648.7	1.095	0.137	244	0.7	0.135	420.6	718	10	1.37	23.7	1366.57	33.3	9.6404	6.47497
Sodexo SA	FR021	France	2005	1.7	15827	700.3	1.134	0.14	276	0.8	0.152	467.8	572	10	1.4	22.6	1493.65	41.2	9.66947	6.55151
Sodexo SA	FR021	France	2006	2.4	15245.1	762.3	1.097	0.167	233	0.9	0.163	431.4	1069	10	1.67	20	1459.39	33.5	9.63201	6.63634
Sodexo SA	FR021	France	2007	2.4	16255.8	700.7	1.174	0.158	267.2	0.8	0.156	517.7	999	10	1.58	23.2	1306.02	51.3	9.69621	6.55208
Sodexo SA	FR021	France	2008	-2.9	12400.6	568.8	1.15	0.196	236.1	1	0.205	376.6	1168	10	1.96	21.8	1160.19	40.6	9.4255	6.34353
Sodexo SA	FR021	France	2009	1.5	16925.9	765.9	1.199	0.229	347.3	1.2	0.222	521	1030	10	2.29	22.1	1684.22	40.5	9.7366	6.64105
Sodexo SA	FR021	France	2010	2.1	19136	873.8	1.2	0.261	355.6	1.2	0.257	682	722	10	2.61	21.9	1609.03	35.2	9.85933	6.77285
Sodexo SA	FR021	France	2011	0.2	16321.7	719	1.19	0.278	355.9	1.7	0.307	458.4	1471	10	2.78	22.7	1369.93	51.3	9.70025	6.57786
Sodexo SA	FR021	France	2012	0	16889.1	728	1.239	0.317	412.5	1.4	0.28	611	1428	10	3.17	23.2	1311.86	46.7	9.73442	6.5903
Sodexo SA	FR021	France	2013	0.6	18100.9	878.7	1.284	0.349	433	1.9	0.342	578.4	1186	10	3.49	20.6	1604.51	40.2	9.80372	6.77844
Sodexo SA	FR021	France	2014	0.9	21023.5	861.6	1.273	0.336	421.4	1.7	0.311	653.2	615	10	3.36	24.4	1575.84	46.2	9.9534	6.75879
Sodexo SA	FR021	France	2015	1.1	22403.4	957.4	1.304	0.429	621.8	1.8	0.483	709.3	2268	10	4.29	23.4	1901.4	53.7	10.017	6.86422
Sodexo SA	FR021	France	2016	1.2	23915.3	1117.5	1.33	0.45	635.6	2.4	0.388	762.1	1670	10	4.5	21.4	2352.61	48.1	10.0823	7.01885
Sodexo SA	FR021	France	2017	2.4	29046.7	1236	1.313	0.495	959.9	2.8	0.448	942.1	773	10	4.95	23.5	2350.38	46.3	10.2767	7.11964
Sodexo SA	FR021	France	2018	1.7	25894.5	1193.3	1.357	0.446	716.8	1.9	0.458	797.2	2113	10	4.46	21.7	2414.76	47.9	10.1618	7.08448
Sodexo SA	FR021	France	2019	1.5	26830.7	1328.3	1.32	0.526	872	2.9	0.473	951.7	2493	10	5.26	20.2	2716.82	45.9	10.1973	7.19166
Sodexo SA	FR021	France	2020	-7.9	9318.8	437.5	1.377	0.558	257.5	2.8	0.506	317.4	679	10	5.58	21.3	864.54	53.2	9.13979	6.08108
Sodexo SA	FR021	France	2021	6.8	57776.2	2846.1	1.408	0.563	1940.1	3	0.511	2078.1	6399	10	5.63	20.3	5558.91	54.2	10.9643	7.9537
Sodexo SA	FR021	France	2022	2.5	33596.6	1623	1.439	0.588	1026.7	2.7	0.66	904	1694	10	5.88	20.7	2972.33	55.9	10.4222	7.39203
Sodexo SA	FR021	France	2023	0.8	30098.4	1490	1.424	0.639	1182.7	2.8	0.61	861.4	1845	10	6.39	20.2	2828.61	44.7	10.3122	7.30653
Sodexo SA	FR021	France	2024	1.1	31589.7	1361.6	1.535	0.664	1115.8	3.2	0.685	873.5	2885	10	6.64	23.2	2740.87	52.2	10.3606	7.21642
Sodexo SA	FR021	France	2025	0.9	32004.8	1509.7	1.52	0.737	1177.2	3.4	0.754	1154.8	3386	10	7.37	21.2	2804.42	50.7	10.3736	7.31967
Legrand SA	FR022	France	2000	3.9	43438.3	670.3	0.995	0.123	669.7	0.6	0.124	1778.2	6223	10	1.23	64.8	1208.41	27.1	10.6791	6.50773
Legrand SA	FR022	France	2001	1.9	49362.5	736.8	1.019	0.154	719.4	0.8	0.167	2057.6	2548	10	1.54	67	1290.89	30.7	10.8069	6.60232
Legrand SA	FR022	France	2002	1.1	46321.7	723.8	1.024	0.115	619.5	0.6	0.112	2285.6	5349	10	1.15	64	1133.47	34.6	10.7434	6.58452
Legrand SA	FR022	France	2003	0.8	54246.1	772.7	1.082	0.166	992.2	0.9	0.162	2364.2	2500	10	1.66	70.2	1250.8	37.7	10.9013	6.64989
Legrand SA	FR022	France	2004	2.8	56000.3	779.9	1.062	0.137	884	0.7	0.121	2317.1	1960	10	1.37	71.8	1408.84	34	10.9331	6.65917
Legrand SA	FR022	France	2005	1.7	56062.4	798.6	1.085	0.183	1007.3	0.8	0.18	2127	5780	10	1.83	70.2	1472.6	32.4	10.9342	6.68286
Legrand SA	FR022	France	2006	2.4	58321.5	945.2	1.129	0.128	754.8	0.7	0.133	2940.9	6530	10	1.28	61.7	1617.61	44	10.9737	6.8514
Legrand SA	FR022	France	2007	2.4	67010.5	1077.3	1.13	0.178	995.1	0.8	0.161	2745.8	3851	10	1.78	62.2	1895	43.8	11.1126	6.98221
Legrand SA	FR022	France	2008	-2.9	49739.9	761.7	1.197	0.221	981.7	1.2	0.238	1913.6	3914	10	2.21	65.3	1175.83	32.1	10.8146	6.63555
Legrand SA	FR022	France	2009	1.5	68072.8	928.7	1.176	0.235	1281.7	1	0.237	3116.7	10114	10	2.35	73.3	1715.69	33.3	11.1283	6.83379
Legrand SA	FR022	France	2010	2.1	72963.6	1006.4	1.247	0.259	1581	1.1	0.255	3189.1	6142	10	2.59	72.5	1564.55	37.6	11.1977	6.91413
Legrand SA	FR022	France	2011	0.2	68403.4	929.4	1.291	0.274	1603.2	1.4	0.285	2714.3	5219	10	2.74	73.6	1607.04	32.5	11.1332	6.83454
Legrand SA	FR022	France	2012	0	73870.4	1143.5	1.311	0.286	1602	1.1	0.243	2886.3	5970	10	2.86	64.6	1754.57	49.1	11.2101	7.04185
Legrand SA	FR022	France	2013	0.6	71181.6	1086.7	1.288	0.353	1648.8	1.7	0.377	3454.8	5762	10	3.53	65.5	1842.45	46.2	11.173	6.9909
Legrand SA	FR022	France	2014	0.9	83188.6	1293.8	1.323	0.357	1845.6	1.8	0.366	3376.3	7098	10	3.57	64.3	2131.87	48.2	11.3289	7.16534
Legrand SA	FR022	France	2015	1.1	81422.5	1200.9	1.334	0.377	2175.6	2.2	0.422	3481	5334	10	3.77	67.8	2051.04	43.8	11.3074	7.09083
Legrand SA	FR022	France	2016	1.2	90836	1361.9	1.351	0.443	2411.2	2.1	0.474	4641.9	9418	10	4.43	66.7	2358.46	49.5	11.4168	7.21664
Legrand SA	FR022	France	2017	2.4	105525	1680.3	1.395	0.474	2870.7	2.6	0.419	5239.4	10484	10	4.74	62.8	3012.21	41.7	11.5667	7.42673
Legrand SA	FR022	France	2018	1.7	108622	1718.7	1.426	0.49	3117.1	2	0.438	4462.3	6434	10	4.9	63.2	3084.29	52.3	11.5956	7.44932
Legrand SA	FR022	France	2019	1.5	108424	1542.3	1.391	0.481	3383.8	2.8	0.437	5370.6	6801	10	4.81	70.3	2850.66	46.5	11.5938	7.34103
Legrand SA	FR022	France	2020	-7.9	39482.3	594.6	1.427	0.547	1103.1	2.4	0.584	1896.7	5948	10	5.47	66.4	912.083	54.8	10.5836	6.38789
Legrand SA	FR022	France	2021	6.8	227004	3524.9	1.446	0.572	7386.2	3.2	0.601	10438.4	15444	10	5.72	64.4	5880.3	48.7	12.3327	8.16761
Legrand SA	FR022	France	2022	2.5	149046	2129.2	1.48	0.641	5044.8	3.3	0.571	7147.1	20887	10	6.41	70	3911.99	55.4	11.912	7.6635
Legrand SA	FR022	France	2023	0.8	121734	1759.2	1.499	0.652	4619.6	3.1	0.573	5146.6	14601	10	6.52	69.2	3262.73	50.9	11.7096	7.47261
Legrand SA	FR022	France	2024	1.1	124545	1769.1	1.547	0.694	4282.9	3.9	0.747	5490.5	18155	10	6.94	70.4	2966.31	52.4	11.7324	7.47823
Legrand SA	FR022	France	2025	0.9	130857	2083.7	1.567	0.709	5532.2	3.4	0.74	6615.1	15636	10	7.09	62.8	3222.17	60.8	11.7819	7.6419
Imerys SA	FR023	France	2000	3.9	4935.5	246.8	1.001	0.025	55	0.1	0.023	125.9	274	10	0.25	20	424.93	25.7	8.50421	5.50858
Imerys SA	FR023	France	2001	1.9	5091.6	282.9	1.075	0.056	53.2	0.2	0.051	131.4	207	10	0.56	18	476.867	27.7	8.53535	5.64509
Imerys SA	FR023	France	2002	1.1	5369.9	306.9	1.011	0.069	71.5	0.3	0.061	134.6	343	10	0.69	17.5	564.594	31.2	8.58856	5.72652
Imerys SA	FR023	France	2003	0.8	5535.4	289.8	1.07	0.025	54.7	0.1	0.024	164.1	439	10	0.25	19.1	464.921	28.9	8.61892	5.66919
Imerys SA	FR023	France	2004	2.8	6439.5	359.7	1.063	0.094	86.6	0.5	0.086	181.8	601	10	0.94	17.9	600.397	36.7	8.77021	5.88527
Imerys SA	FR023	France	2005	1.7	6291.1	374.5	1.124	0.104	95.2	0.5	0.114	170.4	252	10	1.04	16.8	605.708	41.8	8.74689	5.92559
Imerys SA	FR023	France	2006	2.4	6614	348.1	1.142	0.109	101.7	0.6	0.124	181.2	218	10	1.09	19	585.863	46.4	8.79694	5.85249
Imerys SA	FR023	France	2007	2.4	6733.7	393.8	1.141	0.255	139.3	1.4	0.22	170	384	10	2.55	17.1	621.193	37.5	8.81488	5.97584
Imerys SA	FR023	France	2008	-2.9	5331.6	299.5	1.202	0.159	74.2	0.7	0.146	132.5	231	10	1.59	17.8	524	36.2	8.58141	5.70211
Imerys SA	FR023	France	2009	1.5	7261.7	427.2	1.21	0.226	145.4	1.1	0.241	179.8	497	10	2.26	17	655.8	45.1	8.89037	6.05725
Imerys SA	FR023	France	2010	2.1	8045.8	437.3	1.236	0.235	136.5	1.3	0.257	214.2	178	10	2.35	18.4	676.375	41.5	8.99291	6.08062
Imerys SA	FR023	France	2011	0.2	7355.1	427.6	1.248	0.232	142.3	1.3	0.232	216.1	340	10	2.32	17.2	778.75	49.7	8.90315	6.05819
Imerys SA	FR023	France	2012	0	7523.9	408.9	1.229	0.301	157.7	1.2	0.285	191.8	172	10	3.01	18.4	730.114	42.9	8.92584	6.01347
Imerys SA	FR023	France	2013	0.6	8296.2	414.8	1.266	0.374	232.9	2.1	0.427	224.9	460	10	3.74	20	698.01	43.9	9.02355	6.0278
Imerys SA	FR023	France	2014	0.9	8837.7	472.6	1.312	0.328	179.2	1.5	0.376	217.3	410	10	3.28	18.7	829.749	46.2	9.08678	6.15825
Imerys SA	FR023	France	2015	1.1	8976.9	504.3	1.332	0.361	214.3	1.7	0.383	260.9	897	10	3.61	17.8	930.404	56.2	9.10241	6.22317
Imerys SA	FR023	France	2016	1.2	9995.2	526.1	1.314	0.397	260.9	1.8	0.357	250.1	854	10	3.97	19	887.126	46.5	9.20986	6.26549
Imerys SA	FR023	France	2017	2.4	12188.1	631.5	1.376	0.431	289.5	2.3	0.379	322.8	298	10	4.31	19.3	1091.97	50.7	9.40822	6.4481
Imerys SA	FR023	France	2018	1.7	12175.8	647.6	1.376	0.489	398.5	2.5	0.472	368.3	1012	10	4.89	18.8	1070.49	48.8	9.40721	6.47327
Imerys SA	FR023	France	2019	1.5	12204.5	632.4	1.395	0.504	373	2.5	0.546	371.6	574	10	5.04	19.3	1144.45	52.7	9.40956	6.44952
Imerys SA	FR023	France	2020	-7.9	4112.9	240.5	1.408	0.55	138.5	2.3	0.593	105.6	231	10	5.5	17.1	376.871	49.2	8.32188	5.48272
Imerys SA	FR023	France	2021	6.8	24028.3	1258	1.453	0.582	846.1	3	0.502	569.5	1703	10	5.82	19.1	1932.91	48	10.087	7.13728
Imerys SA	FR023	France	2022	2.5	15067.8	891.6	1.461	0.619	545.2	2.5	0.627	391.9	643	10	6.19	16.9	1650.37	45.9	9.62032	6.79302
Imerys SA	FR023	France	2023	0.8	12849.7	679.9	1.44	0.644	522.9	2.8	0.57	295.5	610	10	6.44	18.9	1268.18	58.9	9.46108	6.52195
Imerys SA	FR023	France	2024	1.1	13898.9	705.5	1.51	0.662	481.5	3.5	0.672	423.7	854	10	6.62	19.7	1312.94	58.8	9.53956	6.55891
Imerys SA	FR023	France	2025	0.9	14242	832.9	1.479	0.711	478.9	3.3	0.716	365.6	443	10	7.11	17.1	1325.62	54.2	9.56395	6.72491
Eiffage SA	FR024	France	2000	3.9	47294.5	257.9	0.986	0.097	668.7	0.5	0.096	488.2	767	10	0.97	183.4	327.684	38	10.7641	5.55257
Eiffage SA	FR024	France	2001	1.9	48358.7	270.2	1.017	0.062	621.3	0.4	0.068	486.1	1560	9.8	0.6076	179	343.856	33.6	10.7864	5.59916
Eiffage SA	FR024	France	2002	1.1	50554.2	273	1.024	0.13	855.6	0.8	0.129	507	1324	10	1.3	185.2	316.023	35.4	10.8308	5.60947
Eiffage SA	FR024	France	2003	0.8	53312.1	306.2	1.072	0.099	761.1	0.5	0.106	552.4	1906	10	0.99	174.1	384.254	36.8	10.8839	5.72424
Eiffage SA	FR024	France	2004	2.8	62361.6	375.4	1.086	0.145	1099.1	0.8	0.132	658.2	1054	10	1.45	166.1	455.687	34.9	11.0407	5.92799
Eiffage SA	FR024	France	2005	1.7	59614.6	357.8	1.108	0.15	924.9	0.7	0.163	642.1	1881	10	1.5	166.6	401.951	45.6	10.9957	5.87997
Eiffage SA	FR024	France	2006	2.4	64820.1	325.1	1.141	0.185	1159	1	0.159	787	2686	10	1.85	199.4	418.563	44.6	11.0794	5.78413
Eiffage SA	FR024	France	2007	2.4	67285.1	375.7	1.129	0.228	1207.6	1	0.207	689.4	1315	10	2.28	179.1	426.263	37.3	11.1167	5.92879
Eiffage SA	FR024	France	2008	-2.9	52534.3	293.3	1.195	0.254	1212.3	1.4	0.258	617.7	1576	10	2.54	179.1	353.628	47.7	10.8692	5.6812
Eiffage SA	FR024	France	2009	1.5	72995.7	405.3	1.257	0.233	1411.8	1.4	0.247	799	1935	10	2.33	180.1	478.615	42.6	11.1982	6.00463
Eiffage SA	FR024	France	2010	2.1	76539.6	450.5	1.188	0.263	1645.5	1.4	0.266	844.1	1693	10	2.63	169.9	513.915	39.3	11.2456	6.11036
Eiffage SA	FR024	France	2011	0.2	68300.9	372.4	1.275	0.279	1309.4	1.7	0.32	819.4	2800	10	2.79	183.4	460.102	46.9	11.1317	5.91997
Eiffage SA	FR024	France	2012	0	72707	375.7	1.289	0.335	1833.7	1.8	0.348	750.5	903	10	3.35	193.5	419.757	38	11.1942	5.92879
Eiffage SA	FR024	France	2013	0.6	83611	452.2	1.241	0.295	1801.8	1.2	0.31	911.5	2133	10	2.95	184.9	519.981	40.5	11.3339	6.11412
Eiffage SA	FR024	France	2014	0.9	89278.7	461.6	1.33	0.382	2097.8	2.2	0.388	882.9	801	10	3.82	193.4	534.698	43.6	11.3995	6.1347
Eiffage SA	FR024	France	2015	1.1	87087.1	450.5	1.312	0.399	2473.4	2	0.456	828.8	1459	10	3.99	193.3	487.295	52.2	11.3747	6.11036
Eiffage SA	FR024	France	2016	1.2	97806.8	493.7	1.388	0.491	2808.4	2.3	0.509	1000.3	1839	10	4.91	198.1	604.126	45.7	11.4907	6.20193
Eiffage SA	FR024	France	2017	2.4	118774	599.9	1.385	0.445	3537.7	2.2	0.432	1323.5	3880	10	4.45	198	779.51	53.6	11.685	6.39676
Eiffage SA	FR024	France	2018	1.7	108746	617.5	1.378	0.457	2999	2.6	0.496	1319.1	4574	10	4.57	176.1	758.546	53.3	11.5968	6.42568
Eiffage SA	FR024	France	2019	1.5	118525	628.1	1.465	0.561	3297.5	2.8	0.486	1427.2	4212	10	5.61	188.7	748.853	45.4	11.6829	6.4427
Eiffage SA	FR024	France	2020	-7.9	36477.1	205.2	1.42	0.577	1268.3	2.8	0.517	423.8	1339	10	5.77	177.8	241.174	54.3	10.5044	5.32399
Eiffage SA	FR024	France	2021	6.8	225706	1152.1	1.419	0.598	8464.3	2.4	0.54	2364	7373	10	5.98	195.9	1394.78	56	12.327	7.04934
Eiffage SA	FR024	France	2022	2.5	143832	840.1	1.499	0.627	5330.3	2.8	0.617	1805.2	5783	10	6.27	171.2	972.365	50.2	11.8764	6.73352
Eiffage SA	FR024	France	2023	0.8	134352	739	1.492	0.645	5480.1	3.8	0.59	1306.6	2622	10	6.45	181.8	843.718	59.8	11.8082	6.6053
Eiffage SA	FR024	France	2024	1.1	141090	826.1	1.518	0.705	6152.1	4	0.759	1677.6	1514	10	7.05	170.8	946.631	61	11.8572	6.71672
Eiffage SA	FR024	France	2025	0.9	144446	730.3	1.533	0.676	5339.9	3.7	0.684	1572.5	4782	10	6.76	197.8	808.977	50.4	11.8807	6.59346
Arkema SA	FR025	France	2000	3.9	28316.9	661.6	0.988	0.01	325.2	0	0.011	1105.4	3250	10	0.1	42.8	1164.18	30.9	10.2512	6.49466
Arkema SA	FR025	France	2001	1.9	28009.4	679.8	1.009	0.029	349.4	0.1	0.027	1113.8	2792	10	0.29	41.2	1320.74	33.3	10.2403	6.5218
Arkema SA	FR025	France	2002	1.1	32381.2	693.4	1.044	0.087	431.3	0.5	0.092	1093.9	2495	10	0.87	46.7	1307.26	34.4	10.3853	6.54161
Arkema SA	FR025	France	2003	0.8	31948.9	731.1	1.038	0.052	432.2	0.3	0.058	1167.9	2945	10	0.52	43.7	1383.5	48.6	10.3719	6.59455
Arkema SA	FR025	France	2004	2.8	38448	850.6	1.096	0.013	348.6	0.1	0.013	1457.4	3150	10	0.13	45.2	1646.69	37.4	10.5571	6.74594
Arkema SA	FR025	France	2005	1.7	37372.5	855.2	1.121	0.083	505	0.4	0.095	1215.5	2412	10	0.83	43.7	1476.62	39.6	10.5287	6.75134
Arkema SA	FR025	France	2006	2.4	41420.6	947.8	1.203	0.14	558.5	0.7	0.15	1337.2	2230	10	1.4	43.7	1668.13	39.7	10.6315	6.85414
Arkema SA	FR025	France	2007	2.4	39219.1	942.8	1.182	0.136	661.6	0.6	0.141	1517	3422	10	1.36	41.6	1771.7	36.2	10.5769	6.84885
Arkema SA	FR025	France	2008	-2.9	33122.3	707.7	1.141	0.153	510.1	0.9	0.174	1271.8	2394	10	1.53	46.8	1468.53	38.2	10.408	6.56202
Arkema SA	FR025	France	2009	1.5	41045.9	959	1.195	0.176	769.8	0.9	0.17	1511	2441	10	1.76	42.8	1925.99	35.3	10.6224	6.86589
Arkema SA	FR025	France	2010	2.1	45225.8	994	1.248	0.254	866.8	1.1	0.218	1521.7	4120	10	2.54	45.5	1807.92	38.7	10.7194	6.90174
Arkema SA	FR025	France	2011	0.2	42824.2	939.1	1.22	0.245	874.3	1.1	0.266	1727.6	3683	10	2.45	45.6	1650.72	48.7	10.6649	6.84492
Arkema SA	FR025	France	2012	0	44595.6	1027.5	1.251	0.293	954.1	1.7	0.252	1484.1	3157	10	2.93	43.4	1971.36	41.8	10.7054	6.93488
Arkema SA	FR025	France	2013	0.6	46875.5	1032.5	1.303	0.305	902.2	1.5	0.299	1552.2	2173	10	3.05	45.4	1885.28	46.6	10.7553	6.93974
Arkema SA	FR025	France	2014	0.9	52534.8	1115.4	1.297	0.319	1248.7	1.5	0.349	1883.4	5012	10	3.19	47.1	2220.24	39.8	10.8692	7.01697
Arkema SA	FR025	France	2015	1.1	56267	1308.5	1.34	0.357	1347.7	1.7	0.38	2046.3	6796	10	3.57	43	2371.86	57.5	10.9379	7.17664
Arkema SA	FR025	France	2016	1.2	63471.7	1373.8	1.376	0.395	1682.1	2	0.376	2385.6	6427	10	3.95	46.2	2711.44	45.7	11.0583	7.22534
Arkema SA	FR025	France	2017	2.4	67717.4	1705.7	1.397	0.416	1778.6	1.9	0.466	2580.1	2286	10	4.16	39.7	3125.44	47	11.1231	7.44173
Arkema SA	FR025	France	2018	1.7	68429.5	1617.7	1.407	0.434	1876.1	1.8	0.476	2697.8	3050	10	4.34	42.3	3291.8	46.8	11.1336	7.38876
Arkema SA	FR025	France	2019	1.5	67818.1	1595.7	1.412	0.469	2059.7	2.6	0.401	2262.1	4818	10	4.69	42.5	2996.16	43.1	11.1246	7.37507
Arkema SA	FR025	France	2020	-7.9	24245	536.4	1.448	0.574	738.6	2.9	0.53	820.4	2023	10	5.74	45.2	983.031	56.8	10.096	6.28488
Arkema SA	FR025	France	2021	6.8	141699	3578.3	1.438	0.558	4174.1	2.3	0.562	5392.3	11635	10	5.58	39.6	6711.65	49.5	11.8615	8.18264
Arkema SA	FR025	France	2022	2.5	88125.5	1958.3	1.497	0.586	3250.9	2.5	0.52	3622.2	10443	10	5.86	45	3949.09	52.5	11.3865	7.57983
Arkema SA	FR025	France	2023	0.8	73581.6	1781.6	1.52	0.619	2568.7	3.6	0.586	2273.1	3534	10	6.19	41.3	3656.67	45.5	11.2062	7.48527
Arkema SA	FR025	France	2024	1.1	84165.6	1833.7	1.545	0.712	2775.9	3.6	0.781	3107.2	2666	10	7.12	45.9	3572.41	50.6	11.3405	7.51409
Arkema SA	FR025	France	2025	0.9	78593.9	1672.2	1.572	0.727	3145.5	3.6	0.716	2494	6106	10	7.27	47	2968.36	56.1	11.272	7.4219
ENI SpA	IT001	Italy	2000	3.7	207088	2345.3	0.975	0.116	2937.2	0.5	0.132	6068.3	7550	10	1.16	88.3	4264.5	29.8	12.2409	7.76017
ENI SpA	IT001	Italy	2001	1.8	235510	2637.3	1.045	0.133	3299.8	0.8	0.138	7389.7	22423	10	1.33	89.3	4937.39	33.1	12.3695	7.87751
ENI SpA	IT001	Italy	2002	0.5	210081	2590.4	1.048	0.125	2774.8	0.7	0.111	6630.8	10076	10	1.25	81.1	5006.9	42.6	12.2552	7.85957
ENI SpA	IT001	Italy	2003	0	219836	2336.2	1.051	0.132	3688.4	0.6	0.142	6942.9	12684	10	1.32	94.1	4901.45	36.5	12.3006	7.75628
ENI SpA	IT001	Italy	2004	1.5	252145	2629.2	1.121	0.096	3496.2	0.5	0.087	8025.7	8732	10	0.96	95.9	5554.23	36.6	12.4378	7.87443
ENI SpA	IT001	Italy	2005	0.9	254845	2734.4	1.112	0.117	3996.6	0.5	0.101	7046	6335	10	1.17	93.2	5550.24	37.7	12.4484	7.91367
ENI SpA	IT001	Italy	2006	2	292962	3317.8	1.145	0.2	5253.8	1	0.187	10638.4	15266	10	2	88.3	6472.06	36.2	12.5878	8.10706
ENI SpA	IT001	Italy	2007	1.5	292541	3076.1	1.2	0.265	5565.8	1.5	0.258	10545.3	30239	10	2.65	95.1	5815.48	48.2	12.5864	8.03142
ENI SpA	IT001	Italy	2008	-1	244693	2984.1	1.206	0.208	4475	0.9	0.235	7141	8577	10	2.08	82	5823.72	43.7	12.4078	8.00105
ENI SpA	IT001	Italy	2009	-5.5	190184	2087.6	1.244	0.273	3420.9	1.5	0.283	6566.3	10711	10	2.73	91.1	4433.13	39	12.1557	7.64377
ENI SpA	IT001	Italy	2010	1.7	324342	3583.9	1.243	0.279	7859.7	1.5	0.261	9878.5	33779	10	2.79	90.5	7308.88	37.6	12.6896	8.18421
ENI SpA	IT001	Italy	2011	0.6	333801	3845.6	1.245	0.301	6766.8	1.6	0.273	9466	11708	10	3.01	86.8	7112.13	44.8	12.7183	8.25468
ENI SpA	IT001	Italy	2012	-2.8	262540	3096	1.297	0.323	6339.2	1.6	0.34	9446.4	19838	10	3.23	84.8	6274.83	45.3	12.4782	8.03787
ENI SpA	IT001	Italy	2013	-1.7	278784	3489.2	1.326	0.346	5942.2	1.8	0.358	10157.4	15440	10	3.46	79.9	6639.97	44.9	12.5382	8.15743
ENI SpA	IT001	Italy	2014	0.2	361332	4226.1	1.37	0.299	7758.2	1.5	0.316	10234.4	19944	10	2.99	85.5	8026.05	42.9	12.7976	8.34903
ENI SpA	IT001	Italy	2015	0.8	395124	4146.1	1.322	0.383	9402.7	1.9	0.373	12927.2	22633	10	3.83	95.3	8822.88	40	12.887	8.32992
ENI SpA	IT001	Italy	2016	1.3	439847	4892.6	1.387	0.461	14195.9	2.6	0.457	14485.2	45240	10	4.61	89.9	9291.12	41.1	12.9942	8.49548
ENI SpA	IT001	Italy	2017	1.6	485622	5117.2	1.416	0.433	12165.1	2.2	0.368	15361.3	50621	10	4.33	94.9	10777.4	40.1	13.0932	8.54036
ENI SpA	IT001	Italy	2018	0.8	439271	4843.1	1.459	0.468	13495.8	2.2	0.451	13387.1	10711	10	4.68	90.7	9827.06	53.6	12.9929	8.48531
ENI SpA	IT001	Italy	2019	0.3	420309	4770.8	1.451	0.466	12787.3	2	0.418	12980.1	22058	10	4.66	88.1	9573.71	49.3	12.9487	8.47027
ENI SpA	IT001	Italy	2020	-9	140595	1748.7	1.51	0.539	4836.3	2.3	0.465	5239.5	5578	10	5.39	80.4	3801.23	49.7	11.8536	7.46663
ENI SpA	IT001	Italy	2021	6.7	971600	10120.8	1.513	0.616	38581	3	0.666	32731.6	71026	10	6.16	96	21003	55.2	13.7867	9.22235
ENI SpA	IT001	Italy	2022	3.7	755290	8792.7	1.513	0.627	27309.4	3.2	0.601	21305.7	58597	10	6.27	85.9	18531.8	50.1	13.5349	9.08168
ENI SpA	IT001	Italy	2023	0.9	569472	6583.5	1.573	0.62	19249.1	3.3	0.58	18553.5	63654	10	6.2	86.5	14326.9	50.6	13.2525	8.79232
ENI SpA	IT001	Italy	2024	0.5	557006	5995.8	1.574	0.663	22936.8	3.6	0.638	15857.7	35188	10	6.63	92.9	11986.9	49.1	13.2303	8.69881
ENI SpA	IT001	Italy	2025	0.4	564662	6171.2	1.614	0.718	22241.1	3.8	0.706	15654.1	38844	10	7.18	91.5	12651.6	52.2	13.244	8.72765
Enel SpA	IT002	Italy	2000	3.7	41987.9	1224.1	1.03	0.057	439.3	0.3	0.054	640.9	1827	10	0.57	34.3	3203.25	26.3	10.6451	7.10996
Enel SpA	IT002	Italy	2001	1.8	46353.2	1302.1	1.026	0.027	539.9	0.2	0.024	763.6	1596	10	0.27	35.6	3459.37	38.1	10.744	7.17173
Enel SpA	IT002	Italy	2002	0.5	46138.2	1437.3	1.037	0.065	601.1	0.3	0.067	662.6	812	10	0.65	32.1	3643.43	45.2	10.7394	7.27052
Enel SpA	IT002	Italy	2003	0	50478.7	1633.6	1.04	0.106	794.2	0.6	0.105	743.9	2224	10	1.06	30.9	4278.48	37.5	10.8293	7.39854
Enel SpA	IT002	Italy	2004	1.5	51426.9	1539.7	1.06	0.127	733.4	0.7	0.114	636.4	1460	10	1.27	33.4	4480.84	41.9	10.8479	7.33934
Enel SpA	IT002	Italy	2005	0.9	53485.3	1655.9	1.131	0.11	755.4	0.6	0.122	722.9	1044	10	1.1	32.3	4585.32	37.8	10.8872	7.4121
Enel SpA	IT002	Italy	2006	2	55041.5	1885	1.101	0.185	1014.2	0.9	0.2	846.2	2047	10	1.85	29.2	5605.62	46.8	10.9158	7.54168
Enel SpA	IT002	Italy	2007	1.5	58168.9	1840.8	1.118	0.198	1001.6	1.1	0.206	957.9	1952	10	1.98	31.6	5527.19	49.7	10.9711	7.51796
Enel SpA	IT002	Italy	2008	-1	56334.5	1805.6	1.152	0.189	1122.4	1	0.209	765.5	678	10	1.89	31.2	5300.28	43.1	10.9391	7.49865
Enel SpA	IT002	Italy	2009	-5.5	41914.4	1266.3	1.125	0.262	816	1.3	0.278	596.8	1148	10	2.62	33.1	3738.77	43.7	10.6434	7.14385
Enel SpA	IT002	Italy	2010	1.7	72766.5	2362.5	1.177	0.234	1515.6	1.2	0.237	1172.3	2996	10	2.34	30.8	6451.85	44	11.195	7.76748
Enel SpA	IT002	Italy	2011	0.6	69097.8	1979.9	1.187	0.221	1462.8	0.9	0.231	896.6	2447	10	2.21	34.9	6074.83	44.1	11.1433	7.5908
Enel SpA	IT002	Italy	2012	-2.8	52859.8	1616.5	1.186	0.244	1053.4	1.1	0.212	816.8	2810	10	2.44	32.7	4437.38	46.1	10.8754	7.38802
Enel SpA	IT002	Italy	2013	-1.7	61820.3	1975.1	1.21	0.303	1187.8	1.8	0.284	805.9	2779	10	3.03	31.3	5027.84	40.6	11.032	7.58837
Enel SpA	IT002	Italy	2014	0.2	69776.2	2173.7	1.25	0.334	1718.9	1.4	0.29	955	1958	10	3.34	32.1	5894.59	44.9	11.153	7.68419
Enel SpA	IT002	Italy	2015	0.8	81991.8	2751.4	1.258	0.373	2316.2	1.8	0.396	1024.9	1678	10	3.73	29.8	7327.29	40.7	11.3144	7.91987
Enel SpA	IT002	Italy	2016	1.3	84380.9	2722	1.298	0.432	2451.3	2.1	0.486	1263.7	3280	10	4.32	31	7771.04	53.3	11.3431	7.90912
Enel SpA	IT002	Italy	2017	1.6	95882	2959.3	1.341	0.435	2402.2	2.2	0.452	1300.2	2124	10	4.35	32.4	8560.17	51.8	11.4709	7.99271
Enel SpA	IT002	Italy	2018	0.8	94096.4	2949.7	1.329	0.467	2448.7	2.5	0.398	1222.2	4217	10	4.67	31.9	7564.85	57.7	11.4521	7.98946
Enel SpA	IT002	Italy	2019	0.3	90697.2	2852.1	1.329	0.534	2763.5	2.2	0.587	1137.7	1829	10	5.34	31.8	8204.68	54.6	11.4153	7.95581
Enel SpA	IT002	Italy	2020	-9	32468.1	1044	1.348	0.519	886.7	2.5	0.549	521.3	790	10	5.19	31.1	3011.42	51.3	10.388	6.95081
Enel SpA	IT002	Italy	2021	6.7	201924	5921.5	1.37	0.586	6844.6	2.7	0.51	3129.5	3872	10	5.86	34.1	16040.7	47.8	12.2156	8.68635
Enel SpA	IT002	Italy	2022	3.7	148415	4980.4	1.366	0.584	4704	3.3	0.585	1930.4	1872	10	5.84	29.8	13927.5	63.7	11.9078	8.51327
Enel SpA	IT002	Italy	2023	0.9	120658	3559.2	1.356	0.57	3494.5	3	0.639	1720.8	2483	10	5.7	33.9	9088.17	54.2	11.7007	8.17729
Enel SpA	IT002	Italy	2024	0.5	107489	3681.1	1.398	0.722	3761.6	4.2	0.818	1705.8	2968	10	7.22	29.2	9589.83	54.5	11.5851	8.21097
Enel SpA	IT002	Italy	2025	0.4	119445	3432.3	1.406	0.743	4940.3	3.8	0.849	1792.1	5900	10	7.43	34.8	10423.2	50.8	11.6906	8.14099
Leonardo SpA	IT003	Italy	2000	3.7	15011.4	275.4	1.02	0.04	171.5	0.2	0.04	1337.3	2102	10	0.4	54.5	529.448	39.5	9.61657	5.61822
Leonardo SpA	IT003	Italy	2001	1.8	15566	261.6	1.046	0.042	181.4	0.2	0.042	1403.6	3547	10	0.42	59.5	485.874	42.4	9.65284	5.56682
Leonardo SpA	IT003	Italy	2002	0.5	15031.4	297.7	1.038	0.043	189.4	0.2	0.046	1226.7	2611	10	0.43	50.5	518.115	39.8	9.6179	5.69609
Leonardo SpA	IT003	Italy	2003	0	16148.5	274.6	1.081	0.119	228.9	0.6	0.114	1302.2	3198	10	1.19	58.8	520.199	32.5	9.68958	5.61532
Leonardo SpA	IT003	Italy	2004	1.5	18059.6	321.9	1.079	0.145	301	0.8	0.158	1358.3	3407	10	1.45	56.1	628.984	38.3	9.80143	5.77424
Leonardo SpA	IT003	Italy	2005	0.9	18369.5	322.8	1.126	0.096	261.6	0.5	0.097	1517.2	4012	10	0.96	56.9	588.545	41.9	9.81845	5.77703
Leonardo SpA	IT003	Italy	2006	2	19669.6	372.5	1.149	0.164	334.7	0.8	0.159	1552.3	4696	10	1.64	52.8	718.686	37.9	9.88683	5.92024
Leonardo SpA	IT003	Italy	2007	1.5	20750.2	365.3	1.153	0.179	393.1	1	0.161	1407.1	1142	10	1.79	56.8	651.051	34.4	9.94031	5.90072
Leonardo SpA	IT003	Italy	2008	-1	19442.8	344.7	1.155	0.14	307.2	0.8	0.15	1542.1	3052	10	1.4	56.4	575.096	43.9	9.87523	5.84267
Leonardo SpA	IT003	Italy	2009	-5.5	14229.6	277.9	1.179	0.247	284.5	1.2	0.229	1072.6	3628	10	2.47	51.2	539.498	41.2	9.56308	5.62726
Leonardo SpA	IT003	Italy	2010	1.7	24277.4	421.5	1.237	0.277	533.7	1.2	0.281	2102.9	1968	10	2.77	57.6	688.113	51.3	10.0973	6.04382
Leonardo SpA	IT003	Italy	2011	0.6	23114.8	424.1	1.269	0.256	436.2	1.2	0.27	1894.3	5848	10	2.56	54.5	816.152	44.2	10.0482	6.04997
Leonardo SpA	IT003	Italy	2012	-2.8	18581.5	339.1	1.186	0.298	429.9	1.2	0.257	1256.3	2859	10	2.98	54.8	618.998	44.1	9.82992	5.8263
Leonardo SpA	IT003	Italy	2013	-1.7	21734.7	427	1.269	0.314	518.7	1.6	0.319	1743.7	5622	10	3.14	50.9	746.585	39.9	9.98667	6.05678
Leonardo SpA	IT003	Italy	2014	0.2	26402.9	453.7	1.309	0.358	603.5	2	0.349	2061.6	5954	10	3.58	58.2	780.99	50.6	10.1812	6.11744
Leonardo SpA	IT003	Italy	2015	0.8	25918.3	441.5	1.349	0.409	682	1.8	0.446	2243.9	3681	10	4.09	58.7	796.915	36	10.1627	6.09018
Leonardo SpA	IT003	Italy	2016	1.3	30886.5	538.1	1.321	0.404	872.7	2.3	0.396	2504	7120	10	4.04	57.4	904.275	54.7	10.3381	6.28804
Leonardo SpA	IT003	Italy	2017	1.6	32228.2	597.9	1.378	0.485	1070.8	2.2	0.419	2351.9	8146	10	4.85	53.9	1122.13	51.7	10.3806	6.39342
Leonardo SpA	IT003	Italy	2018	0.8	32183.2	555.8	1.416	0.438	970.5	1.9	0.427	2304.4	5216	10	4.38	57.9	975.969	41	10.3792	6.32041
Leonardo SpA	IT003	Italy	2019	0.3	29920.1	568.8	1.427	0.528	902	2.2	0.52	2461.4	3265	10	5.28	52.6	1072.93	55.4	10.3063	6.34353
Leonardo SpA	IT003	Italy	2020	-9	11397.2	230.2	1.405	0.48	285.7	2.1	0.54	811.6	1917	10	4.8	49.5	416.01	54.8	9.34112	5.43895
Leonardo SpA	IT003	Italy	2021	6.7	73490.2	1273.7	1.459	0.581	2751.9	2.6	0.559	5738.4	15748	10	5.81	57.7	2479.96	44.9	11.2049	7.14968
Leonardo SpA	IT003	Italy	2022	3.7	52428.6	908.6	1.49	0.595	2017	2.5	0.65	4467.6	13157	10	5.95	57.7	1785.08	54.2	10.8672	6.8119
Leonardo SpA	IT003	Italy	2023	0.9	40788.6	787.4	1.523	0.658	1445.1	3.1	0.659	2835.1	9319	10	6.58	51.8	1406.69	56.2	10.6162	6.66874
Leonardo SpA	IT003	Italy	2024	0.5	40185.5	810.2	1.552	0.688	1721.5	3.4	0.602	3377.2	11552	10	6.88	49.6	1406.38	53	10.6013	6.69728
Leonardo SpA	IT003	Italy	2025	0.4	39278.7	714.2	1.549	0.683	1316.6	2.9	0.725	3390.1	6219	10	6.83	55	1397.79	51.4	10.5784	6.57116
Stellantis NV (FCA)	IT004	Italy	2000	3.7	54409.4	607.9	1.01	0.037	671.6	0.2	0.041	2423.3	4797	10	0.37	89.5	1021.05	41.5	10.9043	6.41001
Stellantis NV (FCA)	IT004	Italy	2001	1.8	53813.9	707.1	1.026	0.024	542.4	0.1	0.026	2234	6447	10	0.24	76.1	1344.86	35.2	10.8933	6.56117
Stellantis NV (FCA)	IT004	Italy	2002	0.5	52839.7	591.7	1.03	0.018	626.9	0.1	0.02	2297.2	4574	10	0.18	89.3	1128.64	35.6	10.875	6.383
Stellantis NV (FCA)	IT004	Italy	2003	0	52796.4	582.7	1.071	0.053	547.9	0.2	0.047	2326.7	1865	10	0.53	90.6	970.554	41.7	10.8742	6.36767
Stellantis NV (FCA)	IT004	Italy	2004	1.5	55638	608.1	1.086	0.084	741.4	0.5	0.097	2548.4	6494	10	0.84	91.5	1133.88	38.8	10.9266	6.41034
Stellantis NV (FCA)	IT004	Italy	2005	0.9	59188.8	731.6	1.052	0.057	665.4	0.3	0.063	2630.7	3373	10	0.57	80.9	1448.27	36.2	10.9885	6.59523
Stellantis NV (FCA)	IT004	Italy	2006	2	68288.2	815.9	1.093	0.098	847.1	0.4	0.091	3017.8	2987	10	0.98	83.7	1515.17	30.4	11.1315	6.70429
Stellantis NV (FCA)	IT004	Italy	2007	1.5	64650.1	742.3	1.123	0.161	1014	0.7	0.158	2883.7	5960	10	1.61	87.1	1271.26	29.6	11.0767	6.60975
Stellantis NV (FCA)	IT004	Italy	2008	-1	62949.4	743.2	1.123	0.164	907.5	0.8	0.177	3210.9	3408	10	1.64	84.7	1276.88	40.2	11.0501	6.61097
Stellantis NV (FCA)	IT004	Italy	2009	-5.5	49367.7	620.2	1.146	0.153	768.1	0.9	0.142	2024	6117	10	1.53	79.6	1150.75	43.5	10.8071	6.43004
Stellantis NV (FCA)	IT004	Italy	2010	1.7	74853.4	986.2	1.121	0.269	1673.7	1.6	0.249	3531.1	9037	10	2.69	75.9	1746.96	38.7	11.2233	6.89386
Stellantis NV (FCA)	IT004	Italy	2011	0.6	73583.4	872.9	1.193	0.235	1329.3	1.3	0.259	2954.6	9636	10	2.35	84.3	1717.5	46.8	11.2062	6.77182
Stellantis NV (FCA)	IT004	Italy	2012	-2.8	58395.1	646.7	1.262	0.295	1133.1	1.4	0.28	2352.7	7135	10	2.95	90.3	1052.1	38	10.975	6.47188
Stellantis NV (FCA)	IT004	Italy	2013	-1.7	69777.5	865.7	1.231	0.28	1593.4	1.1	0.297	3036.6	3853	10	2.8	80.6	1454.58	49.8	11.1531	6.76354
Stellantis NV (FCA)	IT004	Italy	2014	0.2	82976.5	984.3	1.256	0.326	1732.9	1.3	0.295	3395.9	7037	10	3.26	84.3	1731.31	43.7	11.3263	6.89193
Stellantis NV (FCA)	IT004	Italy	2015	0.8	97255.2	1181.7	1.27	0.382	2671.8	2.1	0.346	4549	14613	10	3.82	82.3	1923.6	51.8	11.4851	7.07471
Stellantis NV (FCA)	IT004	Italy	2016	1.3	98884.3	1099.9	1.323	0.404	2247.3	2.3	0.399	4261.5	14728	10	4.04	89.9	2025.84	47	11.5017	7.00297
Stellantis NV (FCA)	IT004	Italy	2017	1.6	104474	1227.7	1.329	0.434	3019.4	1.8	0.468	5124.8	16880	10	4.34	85.1	2023.92	48.1	11.5567	7.1129
Stellantis NV (FCA)	IT004	Italy	2018	0.8	106433	1301.1	1.38	0.421	2620.8	2.1	0.359	5153.1	17676	10	4.21	81.8	2234.73	53.5	11.5753	7.17097
Stellantis NV (FCA)	IT004	Italy	2019	0.3	102937	1191.4	1.341	0.46	3150.4	2	0.48	5097	13615	10	4.6	86.4	2302.09	43.7	11.5419	7.08288
Stellantis NV (FCA)	IT004	Italy	2020	-9	37010.8	414.9	1.363	0.536	1235.5	2.8	0.48	1766.4	5268	10	5.36	89.2	755.946	46	10.519	6.02804
Stellantis NV (FCA)	IT004	Italy	2021	6.7	249684	2879.9	1.414	0.586	9247.8	2.9	0.597	12715	43103	10	5.86	86.7	5199.3	50.8	12.428	7.96551
Stellantis NV (FCA)	IT004	Italy	2022	3.7	171396	1896	1.345	0.634	6162.4	3.4	0.619	6911.7	19469	10	6.34	90.4	3410.83	52	12.0517	7.5475
Stellantis NV (FCA)	IT004	Italy	2023	0.9	135174	1696	1.455	0.664	4761.5	3.3	0.648	6174.5	14853	10	6.64	79.7	2918.34	43.9	11.8143	7.43603
Stellantis NV (FCA)	IT004	Italy	2024	0.5	130054	1531.9	1.489	0.707	4609.4	3.9	0.601	5702.1	7207	10	7.07	84.9	2585.16	54	11.7757	7.33426
Stellantis NV (FCA)	IT004	Italy	2025	0.4	130542	1548.5	1.476	0.731	5513.3	4.3	0.836	5987.9	16698	10	7.31	84.3	2858.13	66.8	11.7795	7.34504
Ferrari NV	IT005	Italy	2000	3.7	59863.2	535	1.027	0.037	738.6	0.2	0.04	2759.3	9102	10	0.37	111.9	898.366	36.1	10.9998	6.28227
Ferrari NV	IT005	Italy	2001	1.8	62290.1	593.8	1.029	0.059	748.1	0.3	0.067	2832.4	9753	10	0.59	104.9	1044.7	34.7	11.0396	6.38654
Ferrari NV	IT005	Italy	2002	0.5	65658.3	638.1	1.034	0.115	1020.7	0.5	0.131	3073.3	3047	10	1.15	102.9	1202.57	35.8	11.0922	6.4585
Ferrari NV	IT005	Italy	2003	0	64016.2	578.3	1.07	0.1	775	0.5	0.096	3021.3	10209	10	1	110.7	965.909	40.5	11.0669	6.36009
Ferrari NV	IT005	Italy	2004	1.5	71594.9	701.2	1.101	0.077	806.6	0.4	0.081	4160.2	10984	10	0.77	102.1	1255.16	49.1	11.1788	6.55279
Ferrari NV	IT005	Italy	2005	0.9	72190	751.2	1.102	0.133	1107	0.6	0.136	3708.7	12236	10	1.33	96.1	1451.19	38	11.1871	6.62167
Ferrari NV	IT005	Italy	2006	2	78015.8	838.9	1.134	0.171	1394.7	0.7	0.18	4104.3	6865	10	1.71	93	1414.72	29.6	11.2647	6.73209
Ferrari NV	IT005	Italy	2007	1.5	80545.5	717.9	1.206	0.154	1160	0.7	0.162	3500.4	4371	10	1.54	112.2	1397.63	39.1	11.2966	6.57633
Ferrari NV	IT005	Italy	2008	-1	75577.4	767.3	1.202	0.208	1382.7	1.2	0.187	4124.3	12287	10	2.08	98.5	1355.57	43.8	11.2329	6.64288
Ferrari NV	IT005	Italy	2009	-5.5	53598	504.2	1.201	0.208	900.4	0.9	0.195	3092.5	8831	10	2.08	106.3	909.774	47.5	10.8893	6.22297
Ferrari NV	IT005	Italy	2010	1.7	88085	901.6	1.242	0.272	1756.8	1.6	0.264	3837	5457	10	2.72	97.7	1760.25	43.1	11.3861	6.80417
Ferrari NV	IT005	Italy	2011	0.6	94403.7	836.9	1.275	0.272	1917.8	1.1	0.269	4528.2	5612	10	2.72	112.8	1367.14	45.2	11.4553	6.7297
Ferrari NV	IT005	Italy	2012	-2.8	71976.7	687.5	1.289	0.332	1823.6	1.5	0.374	3590	9713	10	3.32	104.7	1322.77	43.2	11.1841	6.53306
Ferrari NV	IT005	Italy	2013	-1.7	84053.4	764.1	1.34	0.305	1993.9	1.6	0.266	3835.4	4088	10	3.05	110	1333.6	50.1	11.3392	6.6387
Ferrari NV	IT005	Italy	2014	0.2	106900	1027.9	1.351	0.316	2441.6	1.4	0.347	5613.9	19020	10	3.16	104	1729.26	50.8	11.5797	6.93527
Ferrari NV	IT005	Italy	2015	0.8	107722	1139.9	1.37	0.357	2800.5	1.7	0.379	6227.7	5243	10	3.57	94.5	2113.15	57	11.5873	7.0387
Ferrari NV	IT005	Italy	2016	1.3	129042	1174.2	1.352	0.414	3434.6	2.3	0.42	6890.2	15052	10	4.14	109.9	2313.66	55.4	11.7679	7.06834
Ferrari NV	IT005	Italy	2017	1.6	138954	1290.2	1.404	0.436	4333.5	2.5	0.493	7808.8	14433	10	4.36	107.7	2249.27	43.7	11.8419	7.16255
Ferrari NV	IT005	Italy	2018	0.8	126659	1176	1.373	0.492	3351.1	2.5	0.436	6543.7	17454	10	4.92	107.7	2189.01	43.3	11.7493	7.06987
Ferrari NV	IT005	Italy	2019	0.3	121851	1288.1	1.45	0.517	4138.2	2.9	0.492	6799.1	13549	10	5.17	94.6	2152.01	52.6	11.7106	7.16092
Ferrari NV	IT005	Italy	2020	-9	43100.3	443.9	1.478	0.549	1372.9	2.4	0.524	2289	5914	10	5.49	97.1	737.475	41.1	10.6713	6.0956
Ferrari NV	IT005	Italy	2021	6.7	276658	2741.9	1.483	0.547	7995.6	2.5	0.6	13075.5	24805	10	5.47	100.9	4842.97	53.5	12.5305	7.91641
Ferrari NV	IT005	Italy	2022	3.7	220549	1972.7	1.486	0.586	8432.4	2.7	0.666	11703.6	36781	10	5.86	111.8	3757.61	48.7	12.3039	7.58716
Ferrari NV	IT005	Italy	2023	0.9	164557	1458.8	1.548	0.647	5818.2	3	0.582	8646.3	23990	10	6.47	112.8	2569.62	47.1	12.011	7.28537
Ferrari NV	IT005	Italy	2024	0.5	153315	1381.2	1.557	0.719	6784.6	3.7	0.815	7494.9	15620	10	7.19	111	2456.57	49.5	11.9402	7.23071
Ferrari NV	IT005	Italy	2025	0.4	160176	1472.2	1.562	0.698	6168.8	3.3	0.609	7476.9	13987	10	6.98	108.8	2798.44	51.7	11.984	7.29451
Pirelli & C SpA	IT006	Italy	2000	3.7	25293.4	494	1.058	0.112	338.4	0.5	0.121	1120.8	2040	10	1.12	51.2	724.322	38.7	10.1383	6.20254
Pirelli & C SpA	IT006	Italy	2001	1.8	24968.3	487.7	1.023	0.092	307.6	0.5	0.101	1099.2	2906	10	0.92	51.2	718.9	28.8	10.1254	6.1897
Pirelli & C SpA	IT006	Italy	2002	0.5	24665.5	458.5	1.105	0.131	372.7	0.8	0.13	1070.7	3073	10	1.31	53.8	729.164	32.8	10.1132	6.12796
Pirelli & C SpA	IT006	Italy	2003	0	27198.2	518.1	1.059	0.122	460.6	0.7	0.124	1071.1	2122	10	1.22	52.5	808.895	42.1	10.2109	6.25017
Pirelli & C SpA	IT006	Italy	2004	1.5	27279.6	514.7	1.095	0.122	463	0.7	0.104	1079.2	907	10	1.22	53	788.534	48.3	10.2139	6.24358
Pirelli & C SpA	IT006	Italy	2005	0.9	29424.5	593.2	1.131	0.179	544.1	1.1	0.195	1173.5	3251	10	1.79	49.6	940.883	34.6	10.2896	6.38553
Pirelli & C SpA	IT006	Italy	2006	2	31124.2	645.7	1.141	0.212	492.3	1	0.204	1271	3738	10	2.12	48.2	901.871	38	10.3457	6.47033
Pirelli & C SpA	IT006	Italy	2007	1.5	29457.3	557.9	1.15	0.23	625.8	1.4	0.219	1428.4	3315	10	2.3	52.8	828.011	45.3	10.2907	6.32418
Pirelli & C SpA	IT006	Italy	2008	-1	31335.2	626.7	1.218	0.241	529.7	1.3	0.25	1303.3	1968	10	2.41	50	998.644	44.4	10.3525	6.44047
Pirelli & C SpA	IT006	Italy	2009	-5.5	22470.8	434.6	1.227	0.257	387.7	1.1	0.239	857.6	1310	10	2.57	51.7	617.188	49.2	10.02	6.07443
Pirelli & C SpA	IT006	Italy	2010	1.7	36791.5	808.6	1.256	0.31	734.9	1.6	0.284	1460.2	4565	10	3.1	45.5	1255.18	43.7	10.513	6.6953
Pirelli & C SpA	IT006	Italy	2011	0.6	38376.6	823.5	1.236	0.333	958	1.4	0.299	1651.9	2804	10	3.33	46.6	1215.51	43.4	10.5552	6.71356
Pirelli & C SpA	IT006	Italy	2012	-2.8	27454.6	541.5	1.264	0.333	728.8	1.5	0.355	1344.4	3973	10	3.33	50.7	780.178	46.5	10.2203	6.29434
Pirelli & C SpA	IT006	Italy	2013	-1.7	34671.2	659.1	1.28	0.358	720.7	1.6	0.343	1676.1	2343	10	3.58	52.6	1086.54	37.8	10.4537	6.49088
Pirelli & C SpA	IT006	Italy	2014	0.2	40142.4	772	1.35	0.356	1022.2	1.7	0.367	1805.7	4655	10	3.56	52	1206.12	49.7	10.6002	6.64898
Pirelli & C SpA	IT006	Italy	2015	0.8	40657.9	878.1	1.363	0.372	914	2	0.386	1571.7	2818	10	3.72	46.3	1429.29	46.9	10.6129	6.77776
Pirelli & C SpA	IT006	Italy	2016	1.3	46849.5	950.3	1.352	0.409	1409.2	2.2	0.416	1710.8	2397	10	4.09	49.3	1422.94	53.9	10.7547	6.85678
Pirelli & C SpA	IT006	Italy	2017	1.6	50151.7	905.3	1.332	0.435	1385.6	2.4	0.495	2351.2	3429	10	4.35	55.4	1222.96	50.2	10.8228	6.80827
Pirelli & C SpA	IT006	Italy	2018	0.8	51286.1	949.7	1.421	0.456	1591.5	2	0.488	1880.3	5346	10	4.56	54	1443.34	48.1	10.8452	6.85615
Pirelli & C SpA	IT006	Italy	2019	0.3	52026.8	1048.9	1.452	0.526	1739.3	2.6	0.541	2153.8	7489	10	5.26	49.6	1624.19	56.4	10.8595	6.9555
Pirelli & C SpA	IT006	Italy	2020	-9	16929.8	330.7	1.437	0.562	523.8	2.6	0.548	624.2	1367	10	5.62	51.2	513.357	50.2	9.73683	5.80121
Pirelli & C SpA	IT006	Italy	2021	6.7	117494	2171.8	1.488	0.579	3837	2.7	0.529	4328.4	7932	10	5.79	54.1	3198.71	50.2	11.6741	7.68331
Pirelli & C SpA	IT006	Italy	2022	3.7	81376.3	1556	1.518	0.666	2906.9	3.9	0.744	3282.2	7685	10	6.66	52.3	2339.11	50.7	11.3068	7.34987
Pirelli & C SpA	IT006	Italy	2023	0.9	64161.6	1231.5	1.509	0.644	2124.3	3.4	0.661	2576.1	2203	10	6.44	52.1	1724.02	49	11.0692	7.11599
Pirelli & C SpA	IT006	Italy	2024	0.5	60759	1329.5	1.525	0.681	2574.8	3.6	0.737	2206.9	7153	10	6.81	45.7	1955.13	53.8	11.0147	7.19256
Pirelli & C SpA	IT006	Italy	2025	0.4	60557.9	1283	1.534	0.69	2485	3.9	0.62	2601.5	8558	10	6.9	47.2	1748.01	54.8	11.0114	7.15696
Luxottica Group SpA	IT007	Italy	2000	3.7	17839.7	411.1	0.998	0.11	284.9	0.5	0.111	623.2	1998	10	1.1	43.4	745.394	31.9	9.78918	6.01884
Luxottica Group SpA	IT007	Italy	2001	1.8	17352.2	469	1.015	0.125	288.7	0.7	0.142	584.4	752	10	1.25	37	995.692	28.2	9.76147	6.1506
Luxottica Group SpA	IT007	Italy	2002	0.5	18160.9	435.5	1.04	0.111	273.6	0.5	0.102	536.4	1851	10	1.11	41.7	821.947	39.2	9.80703	6.07649
Luxottica Group SpA	IT007	Italy	2003	0	18478.6	446.3	1.011	0.136	321.8	0.6	0.126	610	1583	10	1.36	41.4	870.541	38.6	9.82437	6.10099
Luxottica Group SpA	IT007	Italy	2004	1.5	19122.2	508.6	1.133	0.153	316.9	0.7	0.14	686.4	1064	10	1.53	37.6	1046.29	46.7	9.85861	6.23166
Luxottica Group SpA	IT007	Italy	2005	0.9	20322.7	533.4	1.096	0.167	362.4	0.9	0.177	658.8	908	10	1.67	38.1	1134.91	37.2	9.91949	6.27927
Luxottica Group SpA	IT007	Italy	2006	2	22829.6	582.4	1.12	0.166	348.7	0.9	0.164	827.9	1834	10	1.66	39.2	1212.84	38.4	10.0358	6.36716
Luxottica Group SpA	IT007	Italy	2007	1.5	21927.2	507.6	1.11	0.164	378.8	1	0.152	643.8	1975	10	1.64	43.2	1019.61	30.3	9.99548	6.22969
Luxottica Group SpA	IT007	Italy	2008	-1	21496	504.6	1.121	0.219	376.2	1.1	0.202	784.3	951	10	2.19	42.6	1015.08	46.7	9.97562	6.22377
Luxottica Group SpA	IT007	Italy	2009	-5.5	15815.6	398.4	1.123	0.231	322.2	0.9	0.228	560.7	572	10	2.31	39.7	810.652	44.4	9.66875	5.98746
Luxottica Group SpA	IT007	Italy	2010	1.7	27505.5	642.7	1.128	0.287	545.2	1.7	0.259	836.1	2657	10	2.87	42.8	1305.83	38.6	10.2221	6.46568
Luxottica Group SpA	IT007	Italy	2011	0.6	26543	660.3	1.17	0.281	598.6	1.5	0.248	796.1	2186	10	2.81	40.2	1279.5	32.1	10.1865	6.49269
Luxottica Group SpA	IT007	Italy	2012	-2.8	19539.5	457.6	1.157	0.287	454.2	1.5	0.272	658.5	2257	10	2.87	42.7	996.347	42.5	9.88019	6.126
Luxottica Group SpA	IT007	Italy	2013	-1.7	22661.2	551.4	1.143	0.309	437	1.5	0.317	639.2	1509	10	3.09	41.1	1126.64	41.4	10.0284	6.31246
Luxottica Group SpA	IT007	Italy	2014	0.2	27543.1	658.9	1.2	0.398	748.2	2.3	0.382	890	2831	10	3.98	41.8	1382	40.5	10.2235	6.49057
Luxottica Group SpA	IT007	Italy	2015	0.8	30005.4	811	1.255	0.395	802.5	1.7	0.337	1088.7	1451	10	3.95	37	1554.65	42.9	10.3091	6.69827
Luxottica Group SpA	IT007	Italy	2016	1.3	35521.6	833.8	1.308	0.454	865.4	2.2	0.425	1287.6	2348	10	4.54	42.6	1815.54	45.6	10.4779	6.72599
Luxottica Group SpA	IT007	Italy	2017	1.6	37014	932.3	1.245	0.465	1126	2.4	0.511	1153.4	1721	10	4.65	39.7	1733.1	40.2	10.5191	6.83765
Luxottica Group SpA	IT007	Italy	2018	0.8	33752.5	829.3	1.305	0.513	928.3	2.7	0.467	947	2384	10	5.13	40.7	1536.74	50.4	10.4268	6.72058
Luxottica Group SpA	IT007	Italy	2019	0.3	35759.8	831.6	1.293	0.529	1153.7	3	0.474	1097.4	3209	10	5.29	43	1820.55	49.3	10.4846	6.72335
Luxottica Group SpA	IT007	Italy	2020	-9	10996.7	283.4	1.344	0.551	344.8	2.3	0.518	395	919	10	5.51	38.8	533.399	46.5	9.30535	5.64686
Luxottica Group SpA	IT007	Italy	2021	6.7	78400.1	1974.8	1.346	0.601	2349.5	3.2	0.518	2914.9	4526	10	6.01	39.7	3659.68	60.4	11.2696	7.58822
Luxottica Group SpA	IT007	Italy	2022	3.7	55625.4	1315	1.368	0.625	2020.1	3.7	0.681	1720.7	4093	10	6.25	42.3	2823.92	62	10.9264	7.18159
Luxottica Group SpA	IT007	Italy	2023	0.9	46316.6	1102.8	1.349	0.661	1908.3	3	0.755	1561.3	4311	10	6.61	42	2200.53	53.7	10.7433	7.00561
Luxottica Group SpA	IT007	Italy	2024	0.5	43792.3	1023.2	1.422	0.697	1896.5	2.9	0.605	1470.7	4785	10	6.97	42.8	1914.37	63.6	10.6872	6.93069
Luxottica Group SpA	IT007	Italy	2025	0.4	46565.2	1187.9	1.407	0.692	1573.8	3.9	0.614	1358.7	1689	10	6.92	39.2	2417.61	64.4	10.7486	7.07994
Prada SpA	IT008	Italy	2000	3.7	21583.5	480.7	0.991	0.133	362.8	0.5	0.137	441.9	427	10	1.33	44.9	1275.1	31.3	9.97968	6.17524
Prada SpA	IT008	Italy	2001	1.8	21267.3	479	1.029	0.101	283.5	0.4	0.092	425.5	382	10	1.01	44.4	1108.02	38.1	9.96493	6.1717
Prada SpA	IT008	Italy	2002	0.5	22928.6	478.7	1.065	0.132	328.1	0.8	0.125	483.2	1194	10	1.32	47.9	1204.05	32.6	10.0401	6.17107
Prada SpA	IT008	Italy	2003	0	22868.2	462.9	1.049	0.147	339	0.6	0.15	432.8	1096	10	1.47	49.4	1198.61	44.3	10.0375	6.13751
Prada SpA	IT008	Italy	2004	1.5	26061.4	623.5	1.107	0.183	420.3	0.8	0.164	493.2	993	10	1.83	41.8	1439.28	43.7	10.1682	6.43535
Prada SpA	IT008	Italy	2005	0.9	26208.9	613.8	1.13	0.136	387.7	0.8	0.145	592.5	1837	10	1.36	42.7	1658.32	41	10.1739	6.41967
Prada SpA	IT008	Italy	2006	2	26832.4	635.8	1.142	0.183	506.8	1.1	0.209	613.8	1604	10	1.83	42.2	1655.81	39.9	10.1974	6.45488
Prada SpA	IT008	Italy	2007	1.5	28604.8	606	1.186	0.232	510.1	1.1	0.246	588.3	1811	10	2.32	47.2	1593.16	39.1	10.2613	6.40688
Prada SpA	IT008	Italy	2008	-1	26698.4	605.4	1.172	0.206	459.4	1.2	0.236	491.9	1206	10	2.06	44.1	1499.49	49.8	10.1924	6.40589
Prada SpA	IT008	Italy	2009	-5.5	19956.5	436.7	1.199	0.277	412.6	1.4	0.276	472.3	1111	10	2.77	45.7	1031.23	40.4	9.90131	6.07925
Prada SpA	IT008	Italy	2010	1.7	32416.3	660.2	1.222	0.303	633	1.3	0.29	641	2190	10	3.03	49.1	1537.12	43.6	10.3864	6.49254
Prada SpA	IT008	Italy	2011	0.6	31679.3	690.2	1.265	0.343	719.5	1.7	0.379	632.1	978	10	3.43	45.9	1691.39	46.3	10.3634	6.53698
Prada SpA	IT008	Italy	2012	-2.8	25730.9	586.1	1.3	0.304	648.9	1.4	0.33	574.3	1005	10	3.04	43.9	1473.62	46.1	10.1554	6.37349
Prada SpA	IT008	Italy	2013	-1.7	28380	669.3	1.308	0.326	723.8	1.9	0.329	500.6	1722	10	3.26	42.4	1563.83	43.5	10.2534	6.50623
Prada SpA	IT008	Italy	2014	0.2	33309.7	678.4	1.311	0.41	942.7	2.2	0.378	619.4	616	10	4.1	49.1	1692.05	40.7	10.4136	6.51974
Prada SpA	IT008	Italy	2015	0.8	38251	900	1.361	0.397	925.2	2.2	0.447	766.9	808	10	3.97	42.5	2387.08	49.3	10.5519	6.80239
Prada SpA	IT008	Italy	2016	1.3	43928.2	944.7	1.398	0.405	984.5	1.7	0.393	958	1190	10	4.05	46.5	2232.37	54.1	10.6903	6.85087
Prada SpA	IT008	Italy	2017	1.6	46531.6	1011.6	1.449	0.46	1305.6	2.7	0.493	837.5	1167	10	4.6	46	2779.44	42.5	10.7479	6.91929
Prada SpA	IT008	Italy	2018	0.8	41682.2	962.6	1.433	0.474	1089.5	2.4	0.465	899.6	2582	10	4.74	43.3	2573.16	52.9	10.6378	6.86964
Prada SpA	IT008	Italy	2019	0.3	43707.9	948.1	1.504	0.524	1511	2.6	0.575	1015.3	1275	10	5.24	46.1	2428.26	54.1	10.6853	6.85446
Prada SpA	IT008	Italy	2020	-9	14841.5	346.8	1.478	0.538	464.1	2.3	0.611	264	536	10	5.38	42.8	951.827	57.9	9.60518	5.84875
Prada SpA	IT008	Italy	2021	6.7	103737	2099.9	1.498	0.574	3277.3	2.3	0.573	2033.2	5435	10	5.74	49.4	4930.9	61.1	11.5496	7.64965
Prada SpA	IT008	Italy	2022	3.7	76866.5	1575.1	1.576	0.627	2823.3	3.2	0.642	1658.3	5418	10	6.27	48.8	3852.41	52.3	11.2498	7.36207
Prada SpA	IT008	Italy	2023	0.9	52968.5	1085.4	1.57	0.684	2241.7	2.7	0.627	1241.7	4210	10	6.84	48.8	2557.66	48.3	10.8775	6.9897
Prada SpA	IT008	Italy	2024	0.5	57306.9	1235.1	1.565	0.679	2138.6	2.8	0.716	1175.4	2773	10	6.79	46.4	3000.13	57.9	10.9562	7.11891
Prada SpA	IT008	Italy	2025	0.4	58625.3	1277.2	1.59	0.694	2064.1	3.5	0.702	1360.3	4481	10	6.94	45.9	2947.91	53.9	10.9789	7.15243
Telecom Italia SpA	IT009	Italy	2000	3.7	49142.1	591.4	1.055	0.01	531.1	0	0.011	1240.7	2075	10	0.1	83.1	1180.05	33.8	10.8025	6.38249
Telecom Italia SpA	IT009	Italy	2001	1.8	52522.4	694.7	1.044	0.072	639	0.4	0.081	1397.3	2393	10	0.72	75.6	1670.03	30.3	10.869	6.54348
Telecom Italia SpA	IT009	Italy	2002	0.5	55550.7	768.3	1.077	0.028	549.8	0.2	0.029	1250.6	3472	10	0.28	72.3	1838.21	35.3	10.9251	6.64418
Telecom Italia SpA	IT009	Italy	2003	0	56254	730.6	1.02	0.098	668.6	0.4	0.085	1391.4	2113	10	0.98	77	1639.32	35.7	10.9376	6.59387
Telecom Italia SpA	IT009	Italy	2004	1.5	60459.5	804	1.004	0.101	752.7	0.4	0.116	1623	1490	10	1.01	75.2	1643.61	32.4	11.0097	6.6896
Telecom Italia SpA	IT009	Italy	2005	0.9	61031.8	840.7	1.075	0.087	909.7	0.4	0.1	1432.3	2583	10	0.87	72.6	1736.33	27.3	11.0192	6.73423
Telecom Italia SpA	IT009	Italy	2006	2	66332.1	807	1.118	0.111	1091.1	0.5	0.102	1636.4	4525	10	1.11	82.2	1705.91	42.1	11.1024	6.69332
Telecom Italia SpA	IT009	Italy	2007	1.5	73075.9	1001	1.102	0.133	1128.5	0.8	0.139	1534.2	3667	10	1.33	73	2078.04	41.5	11.1993	6.90875
Telecom Italia SpA	IT009	Italy	2008	-1	62807.3	724.4	1.1	0.174	928.5	1	0.155	1331	1093	10	1.74	86.7	1572	40.1	11.0478	6.58534
Telecom Italia SpA	IT009	Italy	2009	-5.5	49081.5	605.2	1.129	0.161	835.1	1	0.148	1191.7	1715	10	1.61	81.1	1306.19	38.4	10.8012	6.40556
Telecom Italia SpA	IT009	Italy	2010	1.7	78374	917.7	1.154	0.256	1385.2	1.3	0.276	1700.7	5159	10	2.56	85.4	2144.23	53.4	11.2692	6.82187
Telecom Italia SpA	IT009	Italy	2011	0.6	78872.9	1089.4	1.225	0.253	1799.5	1.4	0.274	1584.3	3249	10	2.53	72.4	2475.31	51.7	11.2756	6.99338
Telecom Italia SpA	IT009	Italy	2012	-2.8	63189.6	842.5	1.166	0.276	1176.1	1.3	0.248	1478.2	1409	10	2.76	75	1881.06	49.6	11.0539	6.73637
Telecom Italia SpA	IT009	Italy	2013	-1.7	66525.7	851.8	1.223	0.311	1472.3	1.6	0.338	1452.8	3205	10	3.11	78.1	2055.15	49.5	11.1053	6.74735
Telecom Italia SpA	IT009	Italy	2014	0.2	80436.9	994.3	1.194	0.361	2058.7	1.6	0.307	1799.7	1988	10	3.61	80.9	1990.57	43.7	11.2952	6.90204
Telecom Italia SpA	IT009	Italy	2015	0.8	91065.2	1264.8	1.296	0.342	2352.6	1.7	0.328	2055.3	1796	10	3.42	72	2666.78	41.9	11.4193	7.14267
Telecom Italia SpA	IT009	Italy	2016	1.3	103661	1253.5	1.232	0.432	3229	2.1	0.421	2432.8	3365	10	4.32	82.7	2630.26	48.3	11.5489	7.13369
Telecom Italia SpA	IT009	Italy	2017	1.6	113766	1346.3	1.274	0.416	2899.9	2.1	0.469	2683.4	9256	10	4.16	84.5	3214.68	49.7	11.6419	7.20512
Telecom Italia SpA	IT009	Italy	2018	0.8	104213	1223.2	1.298	0.409	2381.4	1.7	0.355	2677.8	8930	10	4.09	85.2	2476.41	57.8	11.5542	7.10923
Telecom Italia SpA	IT009	Italy	2019	0.3	109902	1300.6	1.334	0.524	3834.9	3	0.587	2776.4	7405	10	5.24	84.5	2802.9	51.5	11.6073	7.17058
Telecom Italia SpA	IT009	Italy	2020	-9	35188.5	480.1	1.319	0.517	1033.2	2.7	0.456	906.6	3041	10	5.17	73.3	1042.67	51.6	10.4685	6.17399
Telecom Italia SpA	IT009	Italy	2021	6.7	244714	3356.8	1.358	0.546	8833.9	3.2	0.47	5851.5	7981	10	5.46	72.9	7798.47	45.6	12.4078	8.11874
Telecom Italia SpA	IT009	Italy	2022	3.7	185576	2346.1	1.352	0.595	6673.2	2.4	0.657	4247.5	5597	10	5.95	79.1	5637.81	55.2	12.1312	7.76051
Telecom Italia SpA	IT009	Italy	2023	0.9	131853	1813.7	1.39	0.666	5120.6	2.9	0.618	2952.8	3115	10	6.66	72.7	3954.67	61.1	11.7894	7.50312
Telecom Italia SpA	IT009	Italy	2024	0.5	134892	1637	1.396	0.661	4393.7	3.6	0.59	3249.3	5745	10	6.61	82.4	3675.47	49.6	11.8122	7.40062
Telecom Italia SpA	IT009	Italy	2025	0.4	133224	1667.4	1.412	0.721	5370.7	3.7	0.768	2995.3	7648	10	7.21	79.9	3716.85	63.7	11.7998	7.41902
Generali Group	IT010	Italy	2000	3.7	150265	1460.3	0.914	0.048	1811.5	0.2	0.053	2138.3	2177	10	0.48	102.9	10975.5	34.1	11.9202	7.2864
Generali Group	IT010	Italy	2001	1.8	165206	1619.7	1.013	0.01	1464.6	0.1	0.01	2037.1	2961	10	0.1	102	11843.7	38.5	12.015	7.39
Generali Group	IT010	Italy	2002	0.5	160702	1521.8	1.071	0.045	2090	0.3	0.048	2168.6	2463	10	0.45	105.6	12540.1	30.6	11.9873	7.32765
Generali Group	IT010	Italy	2003	0	157182	1630.5	1.039	0.067	2115.1	0.4	0.068	1956	3491	10	0.67	96.4	12239.6	32.2	11.9652	7.39664
Generali Group	IT010	Italy	2004	1.5	168390	1634.9	1.114	0.079	2333.6	0.5	0.072	2385.9	7056	10	0.79	103	13710.2	48.9	12.034	7.39934
Generali Group	IT010	Italy	2005	0.9	176535	1856.3	1.067	0.131	2657.8	0.7	0.113	2510.5	3208	10	1.31	95.1	14125.5	42.6	12.0813	7.52634
Generali Group	IT010	Italy	2006	2	214059	2104.8	1.126	0.176	3130	1	0.199	2806.6	4262	10	1.76	101.7	18025.1	41.4	12.274	7.65198
Generali Group	IT010	Italy	2007	1.5	193023	1814.1	1.17	0.097	2966.5	0.6	0.091	2822.5	5912	10	0.97	106.4	14280.4	49.6	12.1706	7.50334
Generali Group	IT010	Italy	2008	-1	190216	1890.8	1.144	0.156	3355.3	0.8	0.15	2822.4	4471	10	1.56	100.6	15199.6	40.7	12.1559	7.54476
Generali Group	IT010	Italy	2009	-5.5	139559	1409.7	1.19	0.166	2640.1	0.7	0.181	2025	3228	10	1.66	99	11094.8	37.3	11.8462	7.25113
Generali Group	IT010	Italy	2010	1.7	232258	2170.6	1.164	0.202	4643.4	1.1	0.218	3040.6	2931	10	2.02	107	16355.3	39.9	12.3556	7.68276
Generali Group	IT010	Italy	2011	0.6	226482	2477.9	1.285	0.255	4862.9	1.2	0.255	3326.4	7055	10	2.55	91.4	21770	40.5	12.3304	7.81517
Generali Group	IT010	Italy	2012	-2.8	171800	1853.3	1.252	0.263	3030.1	1.4	0.242	2429.8	3391	10	2.63	92.7	15113.2	43.4	12.0541	7.52472
Generali Group	IT010	Italy	2013	-1.7	194555	2140.3	1.216	0.296	4436.7	1.6	0.256	2764.1	7458	10	2.96	90.9	18250.8	45.5	12.1785	7.6687
Generali Group	IT010	Italy	2014	0.2	260482	2403	1.256	0.268	5038.5	1.1	0.265	3144.4	3334	10	2.68	108.4	19233.9	55.5	12.4703	7.78447
Generali Group	IT010	Italy	2015	0.8	268880	2869.6	1.296	0.333	6570.4	1.9	0.37	3762.7	4313	10	3.33	93.7	20854.8	40.9	12.502	7.96193
Generali Group	IT010	Italy	2016	1.3	298284	2785.1	1.332	0.438	8792.8	2.1	0.382	3674.3	5983	10	4.38	107.1	20741.7	41.8	12.6058	7.93204
Generali Group	IT010	Italy	2017	1.6	319215	3224.4	1.366	0.459	9957.5	2.3	0.429	3841.4	5486	10	4.59	99	24186	57.5	12.6736	8.0785
Generali Group	IT010	Italy	2018	0.8	298491	3168.7	1.341	0.469	7913	2.3	0.455	3680.3	12381	10	4.69	94.2	26355.9	37.9	12.6065	8.06108
Generali Group	IT010	Italy	2019	0.3	327318	3573.3	1.4	0.487	9168.2	2.8	0.492	4565.5	15292	10	4.87	91.6	26407.9	47.3	12.6987	8.18124
Generali Group	IT010	Italy	2020	-9	107372	1153.3	1.418	0.518	3271.5	2.5	0.474	1211.1	1841	10	5.18	93.1	9911.04	51.5	11.5841	7.05038
Generali Group	IT010	Italy	2021	6.7	670612	7051.6	1.465	0.535	22466.8	2.4	0.578	8105	24897	10	5.35	95.1	54713.5	49.4	13.4159	8.86101
Generali Group	IT010	Italy	2022	3.7	481646	5345.7	1.445	0.542	14317.9	2.9	0.556	5634.8	8535	10	5.42	90.1	46817.6	53.7	13.085	8.58405
Generali Group	IT010	Italy	2023	0.9	387282	3723.9	1.461	0.653	12712.3	3.1	0.581	4600.5	7102	10	6.53	104	29681.7	45.7	12.8669	8.22253
Generali Group	IT010	Italy	2024	0.5	380856	3589.6	1.522	0.641	13747.9	3	0.736	4269.9	9724	10	6.41	106.1	29744	50.2	12.8502	8.1858
Generali Group	IT010	Italy	2025	0.4	389833	4346	1.53	0.757	14048.4	3.7	0.667	5526.7	14498	10	7.57	89.7	37908.8	61.8	12.8735	8.37701
UniCredit SpA	IT011	Italy	2000	3.7	49561.1	588.6	1.031	0.059	662.4	0.3	0.056	365.5	295	7.5	0.4425	84.2	7533.75	33.2	10.811	6.37775
UniCredit SpA	IT011	Italy	2001	1.8	47177.2	487.9	1.007	0.01	444.5	0	0.01	361.8	785	9.1	0.091	96.7	5346.23	30.8	10.7617	6.19011
UniCredit SpA	IT011	Italy	2002	0.5	49166.3	503.2	1.029	0.084	582.2	0.4	0.095	407.1	1286	8.6	0.7224	97.7	6016.94	27	10.803	6.22099
UniCredit SpA	IT011	Italy	2003	0	52728.2	592.5	1.062	0.089	774	0.5	0.095	398.1	705	7.5	0.6675	89	6541.82	51.3	10.8729	6.38435
UniCredit SpA	IT011	Italy	2004	1.5	54802.7	565.6	1.097	0.163	922.5	0.8	0.185	495.9	568	10	1.63	96.9	6695.35	38	10.9115	6.33789
UniCredit SpA	IT011	Italy	2005	0.9	58369.9	686.7	1.064	0.146	1043.8	0.7	0.143	445.4	933	8	1.168	85	7801.31	47.7	10.9746	6.5319
UniCredit SpA	IT011	Italy	2006	2	63560.8	732.3	1.133	0.126	991.7	0.7	0.11	491.1	744	7.7	0.9702	86.8	8391.84	37.5	11.0598	6.59619
UniCredit SpA	IT011	Italy	2007	1.5	63027.4	669.8	1.142	0.154	970.7	0.7	0.153	460.2	769	8	1.232	94.1	8001.78	38.3	11.0513	6.50698
UniCredit SpA	IT011	Italy	2008	-1	54768.4	617.5	1.155	0.152	901	0.8	0.13	381.8	901	6.8	1.0336	88.7	7414.25	43.6	10.9109	6.42568
UniCredit SpA	IT011	Italy	2009	-5.5	45568.5	470.7	1.175	0.152	749.9	0.7	0.13	340.8	321	8.5	1.292	96.8	5422.72	38.2	10.727	6.15422
UniCredit SpA	IT011	Italy	2010	1.7	75683.2	819.1	1.199	0.221	1560.5	1.3	0.242	645.3	540	8.9	1.9669	92.4	9093.82	33	11.2343	6.70821
UniCredit SpA	IT011	Italy	2011	0.6	67437.5	709.1	1.239	0.291	1419.6	1.5	0.316	582.3	638	9.4	2.7354	95.1	9016.18	45.6	11.119	6.564
UniCredit SpA	IT011	Italy	2012	-2.8	59181	736.1	1.236	0.295	1217.9	1.7	0.298	538.4	1280	9.5	2.8025	80.4	8547.27	51.1	10.9884	6.60137
UniCredit SpA	IT011	Italy	2013	-1.7	62201.1	663.8	1.28	0.31	1410.7	1.7	0.276	490.8	1577	8.5	2.635	93.7	8083.74	43.4	11.0381	6.49798
UniCredit SpA	IT011	Italy	2014	0.2	76001.4	775.5	1.239	0.335	1771.4	1.5	0.308	609.2	837	9.1	3.0485	98	9679.98	51.2	11.2385	6.65351
UniCredit SpA	IT011	Italy	2015	0.8	90770	965.6	1.285	0.369	2578.9	1.8	0.336	642.5	763	8.6	3.1734	94	12399.7	38.2	11.4161	6.87275
UniCredit SpA	IT011	Italy	2016	1.3	97999.8	1134.3	1.311	0.405	2663.9	2.1	0.359	894.1	2469	10	4.05	86.4	12259.9	38.5	11.4927	7.03377
UniCredit SpA	IT011	Italy	2017	1.6	104008	1186	1.301	0.429	2622.4	2.3	0.449	926.5	2204	9.9	4.2471	87.7	14011.5	39.3	11.5522	7.07834
UniCredit SpA	IT011	Italy	2018	0.8	101578	1257.2	1.314	0.483	2595.6	2.4	0.415	729.4	627	8.3	4.0089	80.8	14240.3	50	11.5286	7.13664
UniCredit SpA	IT011	Italy	2019	0.3	92297.9	1083.3	1.342	0.46	2977.6	1.9	0.506	782.5	1044	10	4.6	85.2	12372.2	48.1	11.4328	6.98777
UniCredit SpA	IT011	Italy	2020	-9	32431.8	385.6	1.352	0.527	1030.5	2.6	0.593	271.8	419	9.6	5.0592	84.1	4813.35	48.8	10.3869	5.9548
UniCredit SpA	IT011	Italy	2021	6.7	222093	2478.7	1.323	0.595	8619.8	2.5	0.642	1987.5	3976	10	5.95	89.6	31347	53.5	12.3109	7.81549
UniCredit SpA	IT011	Italy	2022	3.7	166859	1704.4	1.421	0.605	5087.8	2.9	0.643	1483.5	2543	10	6.05	97.9	22145.3	57.1	12.0249	7.44097
UniCredit SpA	IT011	Italy	2023	0.9	124146	1361.2	1.388	0.649	3986.4	3.8	0.674	1107.6	3400	10	6.49	91.2	15591.1	49.6	11.7292	7.21612
UniCredit SpA	IT011	Italy	2024	0.5	128956	1426.5	1.437	0.679	4514.5	3.8	0.761	1111.8	1448	10	6.79	90.4	16953.2	53	11.7672	7.26298
UniCredit SpA	IT011	Italy	2025	0.4	123885	1382.6	1.455	0.726	4646.7	3	0.815	1038.2	1377	9.6	6.9696	89.6	15235.8	53	11.7271	7.23172
Intesa Sanpaolo SpA	IT012	Italy	2000	3.7	48963.4	485.3	0.996	0.024	484.6	0.1	0.023	374.8	424	8.1	0.1944	100.9	6115.62	33.1	10.7988	6.18477
Intesa Sanpaolo SpA	IT012	Italy	2001	1.8	49184.2	502.9	1.029	0.017	466.4	0.1	0.016	372.7	997	7.8	0.1326	97.8	6190.8	26.5	10.8033	6.22039
Intesa Sanpaolo SpA	IT012	Italy	2002	0.5	52408.6	542	1.041	0.04	604.2	0.2	0.042	434.5	865	8.2	0.328	96.7	6453.11	41.5	10.8668	6.29527
Intesa Sanpaolo SpA	IT012	Italy	2003	0	54430.5	561.1	1.098	0.044	578	0.2	0.04	433.1	761	8	0.352	97	6123.75	37.2	10.9047	6.3299
Intesa Sanpaolo SpA	IT012	Italy	2004	1.5	58380.4	671	1.021	0.137	844.4	0.6	0.134	510.3	766	8.7	1.1919	87	7908.78	36	10.9747	6.50877
Intesa Sanpaolo SpA	IT012	Italy	2005	0.9	61501.2	588.5	1.053	0.061	698.8	0.3	0.066	510.4	1128	7.7	0.4697	104.5	6760.95	34.3	11.0268	6.37758
Intesa Sanpaolo SpA	IT012	Italy	2006	2	63873.9	628.1	1.127	0.13	1026.2	0.5	0.136	497.4	1218	8.4	1.092	101.7	7346.88	40.2	11.0647	6.4427
Intesa Sanpaolo SpA	IT012	Italy	2007	1.5	64630.7	715.7	1.131	0.125	923.2	0.5	0.13	544.6	1394	8.9	1.1125	90.3	8356.43	40.6	11.0764	6.57326
Intesa Sanpaolo SpA	IT012	Italy	2008	-1	60223.9	579.1	1.145	0.155	946.2	0.7	0.165	565.7	1586	9.6	1.488	104	6529.51	37.7	11.0058	6.36148
Intesa Sanpaolo SpA	IT012	Italy	2009	-5.5	49441.3	495.9	1.211	0.166	722.6	0.7	0.191	399.8	562	8.1	1.3446	99.7	6157.84	35	10.8085	6.20637
Intesa Sanpaolo SpA	IT012	Italy	2010	1.7	82904.8	817.6	1.195	0.241	1781.9	1	0.27	668.3	1859	8.5	2.0485	101.4	9414.2	42.1	11.3254	6.70637
Intesa Sanpaolo SpA	IT012	Italy	2011	0.6	81494.6	778.4	1.205	0.261	1725.5	1.5	0.257	672.8	1851	8.9	2.3229	104.7	9451.89	48.2	11.3083	6.65724
Intesa Sanpaolo SpA	IT012	Italy	2012	-2.8	61774.6	590	1.231	0.238	1233.9	1.4	0.264	484.9	489	8.5	2.023	104.7	7188.06	51.2	11.0312	6.38012
Intesa Sanpaolo SpA	IT012	Italy	2013	-1.7	71581.2	717.2	1.233	0.299	1553.7	1.4	0.313	585.5	947	8.9	2.6611	99.8	8973.5	46.1	11.1786	6.57535
Intesa Sanpaolo SpA	IT012	Italy	2014	0.2	92509.7	899	1.285	0.316	2280.4	1.8	0.344	657.2	1893	8	2.528	102.9	10091.2	49.5	11.4351	6.80128
Intesa Sanpaolo SpA	IT012	Italy	2015	0.8	94517.1	940.5	1.27	0.368	2276.6	1.8	0.415	814.1	1474	10	3.68	100.5	10933.1	37.4	11.4565	6.84641
Intesa Sanpaolo SpA	IT012	Italy	2016	1.3	98118.6	951.7	1.291	0.462	2505.8	1.9	0.394	715.2	2017	9.8	4.5276	103.1	10835.2	47	11.4939	6.85825
Intesa Sanpaolo SpA	IT012	Italy	2017	1.6	108389	1066.8	1.318	0.405	2907.6	2.2	0.386	775.2	2353	9	3.645	101.6	13879.1	48.1	11.5935	6.97242
Intesa Sanpaolo SpA	IT012	Italy	2018	0.8	96593.6	1092.7	1.363	0.468	2781.4	2.7	0.406	879.8	1735	10	4.68	88.4	13060.1	45.9	11.4783	6.99641
Intesa Sanpaolo SpA	IT012	Italy	2019	0.3	103181	1068.1	1.376	0.5	2877.6	2.6	0.482	791.2	2116	7.9	3.95	96.6	12477.3	45.4	11.5442	6.97364
Intesa Sanpaolo SpA	IT012	Italy	2020	-9	33382	317.3	1.39	0.554	1008.5	3.3	0.631	283.2	732	10	5.54	105.2	3541.21	56.6	10.4158	5.75985
Intesa Sanpaolo SpA	IT012	Italy	2021	6.7	240320	2700.2	1.445	0.556	6680.1	2.7	0.48	1858.9	6267	10	5.56	89	34301.2	57.3	12.3897	7.90108
Intesa Sanpaolo SpA	IT012	Italy	2022	3.7	173694	1888	1.361	0.599	5106.7	2.9	0.553	1355.2	2701	9.4	5.6306	92	22590.4	52.1	12.0651	7.54327
Intesa Sanpaolo SpA	IT012	Italy	2023	0.9	131669	1284.6	1.441	0.616	4204.1	2.9	0.542	1046.8	1377	9.3	5.7288	102.5	14080.5	57.5	11.788	7.1582
Intesa Sanpaolo SpA	IT012	Italy	2024	0.5	136859	1353.7	1.485	0.696	4562	4.1	0.71	1248.7	1561	10	6.96	101.1	16756.8	48.5	11.8267	7.2106
Intesa Sanpaolo SpA	IT012	Italy	2025	0.4	141509	1602.6	1.473	0.709	5545.2	3.2	0.807	1061.1	2002	9.6	6.8064	88.3	17660.1	48.3	11.8601	7.37938
Atlantia SpA	IT013	Italy	2000	3.7	13793.1	1103.4	1	0.051	183.1	0.2	0.055	159.9	410	10	0.51	12.5	3637.59	28.5	9.53192	7.00615
Atlantia SpA	IT013	Italy	2001	1.8	14703.4	1185.8	1.015	0.089	217.2	0.5	0.094	160.1	197	10	0.89	12.4	4369.69	39.7	9.59583	7.07817
Atlantia SpA	IT013	Italy	2002	0.5	15460.1	1217.3	1.043	0.112	213.1	0.5	0.108	198.6	227	10	1.12	12.7	4628.09	38.6	9.64602	7.10439
Atlantia SpA	IT013	Italy	2003	0	14530.8	1181.4	1.103	0.08	199.6	0.3	0.087	157.8	286	10	0.8	12.3	4190.8	35.4	9.58403	7.07446
Atlantia SpA	IT013	Italy	2004	1.5	15986.2	1193	1.045	0.152	222.4	0.9	0.14	222.1	387	10	1.52	13.4	3840.84	42	9.67948	7.08423
Atlantia SpA	IT013	Italy	2005	0.9	16591	1176.7	1.124	0.134	226.1	0.7	0.132	190.4	467	10	1.34	14.1	3867.5	38.7	9.71662	7.07047
Atlantia SpA	IT013	Italy	2006	2	19094.1	1290.1	1.129	0.186	288.3	0.9	0.171	210.4	489	10	1.86	14.8	4518.95	33.7	9.85713	7.16248
Atlantia SpA	IT013	Italy	2007	1.5	19224	1298.9	1.14	0.173	282.3	1	0.164	273.9	772	10	1.73	14.8	4430.7	36.6	9.86391	7.16927
Atlantia SpA	IT013	Italy	2008	-1	17589.4	1332.5	1.197	0.19	308.3	1	0.179	239.2	780	10	1.9	13.2	4962.45	40.8	9.77505	7.19481
Atlantia SpA	IT013	Italy	2009	-5.5	14174.2	1143.1	1.198	0.247	314.9	1.2	0.274	178.1	598	10	2.47	12.4	4070.58	40.8	9.55918	7.0415
Atlantia SpA	IT013	Italy	2010	1.7	24158.1	1632.3	1.174	0.259	504.7	1.2	0.24	266.5	623	10	2.59	14.8	5179.76	46.5	10.0924	7.39775
Atlantia SpA	IT013	Italy	2011	0.6	20891.8	1712.4	1.222	0.302	479.6	1.6	0.282	277.3	939	10	3.02	12.2	5575.39	42.5	9.94711	7.44565
Atlantia SpA	IT013	Italy	2012	-2.8	16187.3	1284.7	1.249	0.278	344.5	1.5	0.248	222	693	10	2.78	12.6	4376.48	37	9.69198	7.15828
Atlantia SpA	IT013	Italy	2013	-1.7	19068.1	1315	1.281	0.336	449.2	1.7	0.307	206.5	654	10	3.36	14.5	4810.26	44.1	9.85577	7.18159
Atlantia SpA	IT013	Italy	2014	0.2	23563	1671.1	1.274	0.353	528.7	1.9	0.317	255.1	707	10	3.53	14.1	5831.47	44.4	10.0674	7.42124
Atlantia SpA	IT013	Italy	2015	0.8	27727.6	2069.2	1.288	0.354	634.8	1.5	0.395	404.7	890	10	3.54	13.4	7381.6	49.8	10.2302	7.63492
Atlantia SpA	IT013	Italy	2016	1.3	29053.8	2046	1.33	0.468	766.5	2.7	0.507	373.4	936	10	4.68	14.2	7432.77	52.5	10.2769	7.62364
Atlantia SpA	IT013	Italy	2017	1.6	30723.4	2275.8	1.35	0.459	832.9	2.5	0.411	403.2	782	10	4.59	13.5	7423.5	55.4	10.3328	7.73009
Atlantia SpA	IT013	Italy	2018	0.8	30212.1	2098.1	1.316	0.464	895.5	2.5	0.481	427.8	1185	10	4.64	14.4	6816.54	55.9	10.316	7.64879
Atlantia SpA	IT013	Italy	2019	0.3	27493.4	2051.7	1.405	0.512	732	2.4	0.536	366.7	1135	10	5.12	13.4	7305.42	53.3	10.2217	7.62642
Atlantia SpA	IT013	Italy	2020	-9	9564.1	698.1	1.401	0.546	261.8	2.8	0.526	135.5	264	10	5.46	13.7	2682.19	43.4	9.16577	6.54836
Atlantia SpA	IT013	Italy	2021	6.7	65066.6	5290	1.395	0.55	2146.1	2.5	0.608	843.5	2608	10	5.5	12.3	17791.5	53.5	11.0832	8.57357
Atlantia SpA	IT013	Italy	2022	3.7	48901.5	3419.7	1.433	0.582	1857.6	2.6	0.5	564.5	590	10	5.82	14.3	10844.8	50.8	10.7976	8.13731
Atlantia SpA	IT013	Italy	2023	0.9	37413.7	2834.4	1.528	0.601	1259.1	2.5	0.517	440.8	884	10	6.01	13.2	10809.3	51.3	10.5298	7.94959
Atlantia SpA	IT013	Italy	2024	0.5	36457.2	2661.1	1.465	0.704	1288.7	3	0.621	426.8	619	10	7.04	13.7	10048.2	46.1	10.5039	7.88649
Atlantia SpA	IT013	Italy	2025	0.4	37256.1	2822.4	1.506	0.7	1438.2	3.4	0.753	535.5	805	10	7	13.2	9156.17	52.5	10.5256	7.94534
Ferrero SpA	IT014	Italy	2000	3.7	6448.5	470.7	1.031	0.111	82.4	0.7	0.118	84.4	222	10	1.11	13.7	826.723	39.9	8.7716	6.15422
Ferrero SpA	IT014	Italy	2001	1.8	6756.8	472.5	0.999	0.049	86.7	0.3	0.055	81.8	209	10	0.49	14.3	770.762	33.9	8.8183	6.15804
Ferrero SpA	IT014	Italy	2002	0.5	6466.8	399.2	1.039	0.095	77.7	0.4	0.103	92.3	301	10	0.95	16.2	675.086	37.9	8.77444	5.98946
Ferrero SpA	IT014	Italy	2003	0	6932.8	459.1	1.006	0.137	101.8	0.6	0.136	92.6	173	10	1.37	15.1	880.053	33.4	8.84402	6.12927
Ferrero SpA	IT014	Italy	2004	1.5	7703.8	466.9	1.034	0.089	90.6	0.5	0.09	96.2	155	10	0.89	16.5	873.57	36.4	8.94947	6.14612
Ferrero SpA	IT014	Italy	2005	0.9	7514.2	491.1	1.064	0.185	119.1	0.9	0.162	90.5	178	10	1.85	15.3	884.739	38	8.92455	6.19665
Ferrero SpA	IT014	Italy	2006	2	9085.9	605.7	1.079	0.156	163.5	0.9	0.136	126.9	242	10	1.56	15	1095.57	41	9.11448	6.40638
Ferrero SpA	IT014	Italy	2007	1.5	8672.3	594	1.121	0.162	140.4	0.7	0.147	122.8	99	10	1.62	14.6	1074.62	45.1	9.06789	6.38688
Ferrero SpA	IT014	Italy	2008	-1	8225.9	530.7	1.161	0.266	185.5	1.2	0.229	122.3	250	10	2.66	15.5	933.594	41	9.01504	6.2742
Ferrero SpA	IT014	Italy	2009	-5.5	6066.1	396.5	1.154	0.292	141.1	1.4	0.274	85.7	226	10	2.92	15.3	721.288	40	8.71047	5.98268
Ferrero SpA	IT014	Italy	2010	1.7	10044.3	717.4	1.132	0.243	214.2	1.4	0.235	117.5	392	10	2.43	14	1294.19	40.6	9.21476	6.57563
Ferrero SpA	IT014	Italy	2011	0.6	9887.3	637.9	1.154	0.257	171.4	1.4	0.261	142.8	488	10	2.57	15.5	1209.84	51	9.19901	6.45818
Ferrero SpA	IT014	Italy	2012	-2.8	7727.9	529.3	1.158	0.283	140.7	1.6	0.298	113.9	237	10	2.83	14.6	939.432	41.3	8.95259	6.27156
Ferrero SpA	IT014	Italy	2013	-1.7	9020.4	644.3	1.207	0.345	234.4	1.8	0.301	134.8	146	10	3.45	14	1145.84	41.4	9.10724	6.46816
Ferrero SpA	IT014	Italy	2014	0.2	10156.3	686.2	1.189	0.304	250.1	1.5	0.3	123.6	313	10	3.04	14.8	1126.16	30.5	9.22585	6.53117
Ferrero SpA	IT014	Italy	2015	0.8	11205.9	794.7	1.23	0.396	272.8	2.1	0.385	146.9	356	10	3.96	14.1	1381.25	47.6	9.3242	6.67796
Ferrero SpA	IT014	Italy	2016	1.3	12913.4	812.2	1.221	0.416	300.8	1.7	0.358	173.8	345	10	4.16	15.9	1354.63	44.9	9.46602	6.69975
Ferrero SpA	IT014	Italy	2017	1.6	13942.1	948.4	1.195	0.465	344.1	2.6	0.459	162.4	348	10	4.65	14.7	1694.1	47	9.54267	6.85478
Ferrero SpA	IT014	Italy	2018	0.8	13561.1	837.1	1.234	0.484	439.1	2.2	0.413	179.7	566	10	4.84	16.2	1451.48	44.9	9.51496	6.72994
Ferrero SpA	IT014	Italy	2019	0.3	13124.9	875	1.273	0.553	431.8	3	0.584	196.4	661	10	5.53	15	1644.27	53.9	9.48227	6.77422
Ferrero SpA	IT014	Italy	2020	-9	4541.7	291.1	1.261	0.518	153.8	3	0.567	65.5	201	10	5.18	15.6	543.378	46.9	8.42106	5.67367
Ferrero SpA	IT014	Italy	2021	6.7	31915.8	1946.1	1.274	0.606	1071.2	2.9	0.578	398.4	428	10	6.06	16.4	3459.7	50.7	10.3709	7.57358
Ferrero SpA	IT014	Italy	2022	3.7	22074.5	1554.5	1.267	0.602	854.2	3.2	0.673	280	649	10	6.02	14.2	2775.51	50.3	10.0022	7.34891
Ferrero SpA	IT014	Italy	2023	0.9	17826.1	1150.1	1.331	0.652	556.9	3	0.563	220.8	493	10	6.52	15.5	2058.26	52.6	9.78842	7.0476
Ferrero SpA	IT014	Italy	2024	0.5	16029.8	977.4	1.33	0.657	633.5	3.7	0.646	190.1	504	10	6.57	16.4	1828.74	59.3	9.6822	6.8849
Ferrero SpA	IT014	Italy	2025	0.4	17523.6	1260.7	1.35	0.699	721.8	4.1	0.626	209.6	525	10	6.99	13.9	2111.53	50.7	9.7713	7.13942
Barilla Group	IT015	Italy	2000	3.7	10977.7	459.3	1.004	0.102	146.8	0.4	0.1	195.8	230	10	1.02	23.9	807.414	31.5	9.30362	6.1297
Barilla Group	IT015	Italy	2001	1.8	10763.2	448.5	1.019	0.1	151.1	0.4	0.095	185.7	336	10	1	24	836.737	31.9	9.28389	6.10591
Barilla Group	IT015	Italy	2002	0.5	11456.2	467.6	1.013	0.1	151.2	0.4	0.107	196.3	364	10	1	24.5	857.131	40.4	9.34629	6.14761
Barilla Group	IT015	Italy	2003	0	12064.6	467.6	1.062	0.13	199	0.7	0.122	212.4	418	10	1.3	25.8	903.329	38.6	9.39803	6.14761
Barilla Group	IT015	Italy	2004	1.5	12253	436	1.043	0.103	187.1	0.5	0.112	210	657	10	1.03	28.1	710.826	32	9.41353	6.07764
Barilla Group	IT015	Italy	2005	0.9	13569.9	504.5	1.103	0.081	171.9	0.5	0.077	253.3	449	10	0.81	26.9	964.461	39.1	9.51561	6.22357
Barilla Group	IT015	Italy	2006	2	13788.1	508.8	1.188	0.12	230.7	0.6	0.127	265.6	793	10	1.2	27.1	911.229	35	9.53156	6.23206
Barilla Group	IT015	Italy	2007	1.5	14852	616.3	1.095	0.19	286.7	0.8	0.17	232.5	533	10	1.9	24.1	1042.86	46.6	9.60589	6.42373
Barilla Group	IT015	Italy	2008	-1	13194.9	519.5	1.156	0.231	243	1	0.258	228.7	204	10	2.31	25.4	934.567	47.3	9.48759	6.25287
Barilla Group	IT015	Italy	2009	-5.5	10580.6	400.8	1.198	0.196	162.5	0.8	0.202	187.4	538	10	1.96	26.4	750.314	41.4	9.26678	5.99346
Barilla Group	IT015	Italy	2010	1.7	16734.7	672.1	1.271	0.272	327	1.5	0.262	266.4	458	10	2.72	24.9	1168.74	42.6	9.72524	6.51041
Barilla Group	IT015	Italy	2011	0.6	17160.9	624	1.253	0.32	368.1	1.4	0.297	322.1	717	10	3.2	27.5	1136.67	34.3	9.75039	6.43615
Barilla Group	IT015	Italy	2012	-2.8	13971.1	547.9	1.281	0.35	317.4	2.1	0.354	210.1	518	10	3.5	25.5	938.118	42.5	9.54475	6.30609
Barilla Group	IT015	Italy	2013	-1.7	14296	505.2	1.315	0.349	350.7	1.5	0.314	236.3	469	10	3.49	28.3	913.993	51.4	9.56774	6.22495
Barilla Group	IT015	Italy	2014	0.2	17836.2	630.3	1.311	0.37	395	1.6	0.317	314.5	373	10	3.7	28.3	1028.59	43.5	9.78899	6.4462
Barilla Group	IT015	Italy	2015	0.8	20000.2	775.2	1.324	0.408	561.3	1.7	0.378	315.3	1044	10	4.08	25.8	1399.61	52.5	9.9035	6.65312
Barilla Group	IT015	Italy	2016	1.3	22045.1	903.5	1.335	0.435	626.2	1.8	0.446	363	546	10	4.35	24.4	1585.25	51.5	10.0008	6.80628
Barilla Group	IT015	Italy	2017	1.6	24253.6	998.1	1.431	0.455	657.7	2.6	0.423	365.6	448	10	4.55	24.3	1898.66	41.8	10.0963	6.90585
Barilla Group	IT015	Italy	2018	0.8	23476.9	966.1	1.457	0.498	646.8	2.9	0.538	346.9	546	10	4.98	24.3	1864.39	56.6	10.0638	6.87327
Barilla Group	IT015	Italy	2019	0.3	21525.4	757.9	1.429	0.485	571.5	2.2	0.482	391.8	1128	10	4.85	28.4	1406.56	43.8	9.97699	6.63055
Barilla Group	IT015	Italy	2020	-9	7845.8	328.3	1.44	0.633	294.8	3.6	0.563	145.8	151	10	6.33	23.9	622.686	42.7	8.96773	5.79393
Barilla Group	IT015	Italy	2021	6.7	55333.8	1983.3	1.477	0.579	1611.8	2.5	0.494	840.1	2836	10	5.79	27.9	3340.65	43.7	10.9211	7.59252
Barilla Group	IT015	Italy	2022	3.7	39955.7	1530.9	1.479	0.639	1468.3	3.6	0.731	662	1881	10	6.39	26.1	2879.13	45.8	10.5955	7.33361
Barilla Group	IT015	Italy	2023	0.9	29313.1	1201.4	1.557	0.681	1225.7	3.1	0.737	527	1013	10	6.81	24.4	2377.55	46.1	10.2858	7.09124
Barilla Group	IT015	Italy	2024	0.5	27102.2	1000.1	1.541	0.681	924.9	3	0.71	519.2	916	10	6.81	27.1	1737.97	54.7	10.2074	6.90786
Barilla Group	IT015	Italy	2025	0.4	28124.3	1196.8	1.533	0.715	1095.5	3.7	0.794	509.7	783	10	7.15	23.5	1983.22	50.8	10.2444	7.08741
Salini Impregilo SpA	IT016	Italy	2000	3.7	51511.1	256.1	0.968	0.078	646.7	0.4	0.074	508.1	1030	9.9	0.7722	201.1	289.961	38.6	10.8496	5.54557
Salini Impregilo SpA	IT016	Italy	2001	1.8	52469	290.7	1.001	0.072	682.5	0.3	0.08	603.9	1373	10	0.72	180.5	352.538	27.7	10.868	5.67229
Salini Impregilo SpA	IT016	Italy	2002	0.5	54370.1	309.4	1.049	0.134	947	0.7	0.146	595.8	1876	10	1.34	175.7	400.388	43.5	10.9036	5.73463
Salini Impregilo SpA	IT016	Italy	2003	0	53281.2	257.1	1.066	0.14	786.7	0.6	0.125	684.4	2168	10	1.4	207.2	298.403	40.4	10.8833	5.54947
Salini Impregilo SpA	IT016	Italy	2004	1.5	56133.5	270.1	1.087	0.161	880.5	1	0.15	722.1	2165	10	1.61	207.8	295.843	45.6	10.9355	5.59879
Salini Impregilo SpA	IT016	Italy	2005	0.9	64005.7	322.6	1.114	0.174	1058	1	0.185	659.3	2071	10	1.74	198.4	415.938	43.1	11.0667	5.77641
Salini Impregilo SpA	IT016	Italy	2006	2	73789.6	405.2	1.132	0.186	1411.5	1	0.191	715.3	985	10	1.86	182.1	527.677	41	11.209	6.00438
Salini Impregilo SpA	IT016	Italy	2007	1.5	69527	344.4	1.182	0.212	1273.4	1.2	0.207	867.1	1225	10	2.12	201.9	451.016	48	11.1495	5.8418
Salini Impregilo SpA	IT016	Italy	2008	-1	67056.8	316.3	1.173	0.235	1146.7	1.1	0.236	851.4	2697	10	2.35	212	403.142	48.5	11.1133	5.75669
Salini Impregilo SpA	IT016	Italy	2009	-5.5	47966.7	260.8	1.234	0.285	940.9	1.6	0.289	507.2	557	10	2.85	183.9	328.726	43.8	10.7783	5.56375
Salini Impregilo SpA	IT016	Italy	2010	1.7	83105.2	401.1	1.243	0.258	1538.6	1.4	0.274	868.4	959	10	2.58	207.2	443.764	43.1	11.3279	5.99421
Salini Impregilo SpA	IT016	Italy	2011	0.6	77982.1	384	1.243	0.237	1454.4	1	0.246	795.6	1807	10	2.37	203.1	419.5	42.5	11.2642	5.95064
Salini Impregilo SpA	IT016	Italy	2012	-2.8	59562.7	331.6	1.285	0.31	1356.6	1.8	0.351	684.9	1145	10	3.1	179.6	382.849	44.8	10.9948	5.80393
Salini Impregilo SpA	IT016	Italy	2013	-1.7	69827.8	339.8	1.32	0.375	1772.9	1.9	0.332	831.3	1356	10	3.75	205.5	433.755	47.5	11.1538	5.82836
Salini Impregilo SpA	IT016	Italy	2014	0.2	82440.6	433.9	1.339	0.333	1979.2	1.5	0.322	989	1589	10	3.33	190	559.094	49.9	11.3198	6.07281
Salini Impregilo SpA	IT016	Italy	2015	0.8	90647.8	491	1.368	0.419	2742.2	2.5	0.454	1118.8	3361	10	4.19	184.6	588.9	50.1	11.4147	6.19644
Salini Impregilo SpA	IT016	Italy	2016	1.3	105130	495.9	1.394	0.374	2430.9	1.5	0.413	1042.7	2703	10	3.74	212	642.045	52.2	11.563	6.20637
Salini Impregilo SpA	IT016	Italy	2017	1.6	108523	615.6	1.393	0.468	3076.2	2.4	0.496	1278	2189	10	4.68	176.3	683.302	53.8	11.5947	6.4226
Salini Impregilo SpA	IT016	Italy	2018	0.8	102928	583.2	1.443	0.518	3419.5	2.8	0.565	1082.4	1322	10	5.18	176.5	761.611	51.7	11.5418	6.36853
Salini Impregilo SpA	IT016	Italy	2019	0.3	104501	518.9	1.406	0.535	3276.9	2.6	0.469	1098.5	2535	10	5.35	201.4	656.42	54.3	11.557	6.25171
Salini Impregilo SpA	IT016	Italy	2020	-9	35107.4	174.1	1.459	0.531	1132.6	2.5	0.536	382.3	649	10	5.31	201.7	194.8	40.8	10.4662	5.15963
Salini Impregilo SpA	IT016	Italy	2021	6.7	258256	1394.5	1.478	0.579	8070.4	2.4	0.527	3235.6	4647	10	5.79	185.2	1619.53	49.8	12.4617	7.24029
Salini Impregilo SpA	IT016	Italy	2022	3.7	184334	887.1	1.524	0.629	6350	3.6	0.65	2375.4	2412	10	6.29	207.8	1095.74	56.8	12.1245	6.78796
Salini Impregilo SpA	IT016	Italy	2023	0.9	136102	666.8	1.553	0.632	4449.8	3.6	0.658	1684.8	2864	10	6.32	204.1	862.467	41.7	11.8212	6.50249
Salini Impregilo SpA	IT016	Italy	2024	0.5	139419	764.4	1.593	0.669	5301.5	2.7	0.686	1531.9	1838	10	6.69	182.4	893.366	54.1	11.8452	6.63909
Salini Impregilo SpA	IT016	Italy	2025	0.4	139585	660.3	1.601	0.716	5655	4.2	0.697	1623	4341	10	7.16	211.4	745.811	50.1	11.8464	6.49269
De'Longhi SpA	IT017	Italy	2000	3.7	24776.4	428.7	1.007	0.081	344.1	0.4	0.093	1059.5	2270	10	0.81	57.8	941.971	43.8	10.1176	6.06076
De'Longhi SpA	IT017	Italy	2001	1.8	26134.6	471.7	1.001	0.03	268	0.1	0.033	992.6	3159	10	0.3	55.4	869.162	33.3	10.171	6.15634
De'Longhi SpA	IT017	Italy	2002	0.5	25666.1	498.4	1.067	0.094	364.2	0.5	0.106	1124.2	2818	10	0.94	51.5	1030.3	32.2	10.1529	6.2114
De'Longhi SpA	IT017	Italy	2003	0	25607.4	434	1.091	0.111	363.7	0.5	0.113	1096.5	1507	10	1.11	59	790.319	38.8	10.1506	6.07304
De'Longhi SpA	IT017	Italy	2004	1.5	29025.5	484.6	1.11	0.096	436.6	0.4	0.094	969.7	2477	10	0.96	59.9	957.883	45.3	10.2759	6.18332
De'Longhi SpA	IT017	Italy	2005	0.9	27029.2	528.9	1.171	0.13	421.5	0.7	0.128	1090.9	2382	10	1.3	51.1	976.061	37	10.2047	6.2708
De'Longhi SpA	IT017	Italy	2006	2	32184.8	534.6	1.158	0.115	507.5	0.6	0.124	1182.2	1365	10	1.15	60.2	1127.14	51.9	10.3792	6.28152
De'Longhi SpA	IT017	Italy	2007	1.5	30926.8	497.2	1.172	0.147	444.6	0.8	0.135	1120.5	3919	10	1.47	62.2	1022.28	41.4	10.3394	6.20899
De'Longhi SpA	IT017	Italy	2008	-1	28665.2	494.2	1.172	0.226	574.8	1	0.195	1068.6	2468	10	2.26	58	1036.03	41.4	10.2634	6.20294
De'Longhi SpA	IT017	Italy	2009	-5.5	21785.1	408.7	1.202	0.22	419	1.1	0.2	797.3	1829	10	2.2	53.3	867.689	44.6	9.98898	6.01298
De'Longhi SpA	IT017	Italy	2010	1.7	38987.9	650.9	1.242	0.211	730	1.1	0.204	1581.6	5503	10	2.11	59.9	1397.11	37.3	10.571	6.47836
De'Longhi SpA	IT017	Italy	2011	0.6	38514.9	696.5	1.216	0.298	906.7	1.6	0.333	1725.3	2561	10	2.98	55.3	1363.14	47	10.5588	6.54607
De'Longhi SpA	IT017	Italy	2012	-2.8	29719.2	582.7	1.281	0.315	625.9	1.7	0.31	1160.1	2151	10	3.15	51	1065.03	44.1	10.2995	6.36767
De'Longhi SpA	IT017	Italy	2013	-1.7	31972.3	611.3	1.283	0.305	690.9	1.6	0.299	1196.1	976	10	3.05	52.3	1310.09	41	10.3726	6.41559
De'Longhi SpA	IT017	Italy	2014	0.2	38581	657.3	1.303	0.362	819.9	1.7	0.308	1661.2	4169	10	3.62	58.7	1336.55	48.3	10.5605	6.48814
De'Longhi SpA	IT017	Italy	2015	0.8	46544	755.6	1.307	0.39	1284.9	1.8	0.418	1574.7	3305	10	3.9	61.6	1548.09	47.8	10.7482	6.62751
De'Longhi SpA	IT017	Italy	2016	1.3	45185.8	769.8	1.353	0.404	1079.7	1.9	0.371	1931.4	2979	10	4.04	58.7	1458.36	41.1	10.7185	6.64613
De'Longhi SpA	IT017	Italy	2017	1.6	49757.5	966.2	1.39	0.446	1282.6	2.4	0.477	1962.7	2922	10	4.46	51.5	1953.44	42.9	10.8149	6.87337
De'Longhi SpA	IT017	Italy	2018	0.8	47818.9	813.2	1.406	0.466	1343.9	2.1	0.402	1639.2	3900	10	4.66	58.8	1671.77	49.8	10.7752	6.70098
De'Longhi SpA	IT017	Italy	2019	0.3	48345.9	888.7	1.428	0.501	1300.3	3	0.562	2020.2	5445	10	5.01	54.4	1654.11	57.1	10.7861	6.78976
De'Longhi SpA	IT017	Italy	2020	-9	17181.9	310.1	1.433	0.557	613.7	2.5	0.529	583.8	1900	10	5.57	55.4	598.341	50.6	9.75161	5.73689
De'Longhi SpA	IT017	Italy	2021	6.7	107232	1726.8	1.476	0.601	3702.1	3.1	0.566	3634	8086	10	6.01	62.1	3645.04	49.7	11.5827	7.45403
De'Longhi SpA	IT017	Italy	2022	3.7	79178.6	1450.2	1.485	0.593	2592.4	2.8	0.614	3129.5	10135	10	5.93	54.6	3022.92	56.4	11.2795	7.27946
De'Longhi SpA	IT017	Italy	2023	0.9	61966.4	1151.8	1.468	0.658	2199.7	3.8	0.74	2304.4	6909	10	6.58	53.8	2270.06	54.8	11.0343	7.04908
De'Longhi SpA	IT017	Italy	2024	0.5	59883.9	1008.1	1.522	0.685	2516.2	3.2	0.617	2120.2	2262	10	6.85	59.4	2131.31	45.4	11.0002	6.91582
De'Longhi SpA	IT017	Italy	2025	0.4	63623.6	1022.9	1.558	0.708	2135.7	3.8	0.703	2341.8	5325	10	7.08	62.2	1897.11	55.2	11.0607	6.9304
Campari Group	IT018	Italy	2000	3.7	11548.1	469.4	1.032	0.057	137.9	0.2	0.053	178.8	245	10	0.57	24.6	791.02	34.2	9.35428	6.15146
Campari Group	IT018	Italy	2001	1.8	11616.3	462.8	1.023	0.013	113.6	0.1	0.011	214.2	322	10	0.13	25.1	915.709	29.9	9.36016	6.13729
Campari Group	IT018	Italy	2002	0.5	12174.1	433.2	1.055	0.037	142.8	0.2	0.036	236.1	564	10	0.37	28.1	792.619	41.5	9.40707	6.0712
Campari Group	IT018	Italy	2003	0	11655.6	406.1	1.037	0.013	122.4	0.1	0.014	231	587	10	0.13	28.7	750.666	35.8	9.36354	6.0066
Campari Group	IT018	Italy	2004	1.5	12473.9	442.3	1.066	0.079	146.2	0.4	0.078	230.4	385	10	0.79	28.2	828.954	39.4	9.43139	6.09199
Campari Group	IT018	Italy	2005	0.9	13903.4	481.1	1.122	0.106	194	0.6	0.118	258	370	10	1.06	28.9	819.291	37.2	9.53989	6.17608
Campari Group	IT018	Italy	2006	2	15516.6	576.8	1.114	0.156	217.2	0.6	0.166	272	933	10	1.56	26.9	1075.95	39.8	9.64967	6.3575
Campari Group	IT018	Italy	2007	1.5	15359.6	632.1	1.189	0.118	233.6	0.6	0.125	294.1	897	10	1.18	24.3	1153.77	37.9	9.6395	6.44905
Campari Group	IT018	Italy	2008	-1	13104.6	490.8	1.178	0.187	224.7	1.1	0.168	203	256	10	1.87	26.7	832.423	45.5	9.48072	6.19604
Campari Group	IT018	Italy	2009	-5.5	11170.9	461.6	1.284	0.187	206	1	0.186	191.4	577	10	1.87	24.2	876.252	45.5	9.32107	6.1347
Campari Group	IT018	Italy	2010	1.7	16127.2	608.6	1.255	0.227	349.1	0.9	0.259	275.6	752	10	2.27	26.5	1075.12	45.6	9.68826	6.41116
Campari Group	IT018	Italy	2011	0.6	16508	644.8	1.283	0.226	325.8	1	0.252	322.7	676	10	2.26	25.6	1064.6	47.1	9.7116	6.46894
Campari Group	IT018	Italy	2012	-2.8	13086.6	529.8	1.262	0.279	277.6	1.4	0.25	204.8	245	10	2.79	24.7	1040.61	48.1	9.47934	6.2725
Campari Group	IT018	Italy	2013	-1.7	15280.6	525.1	1.324	0.346	385.9	1.8	0.366	252.3	876	10	3.46	29.1	1004.37	47.7	9.63434	6.26359
Campari Group	IT018	Italy	2014	0.2	19812.5	818.7	1.381	0.355	489	2.1	0.371	300.9	964	10	3.55	24.2	1535.58	43.4	9.89407	6.70772
Campari Group	IT018	Italy	2015	0.8	20815.6	768.1	1.344	0.38	587.9	1.6	0.374	310.9	1025	10	3.8	27.1	1520.42	50.8	9.94346	6.64392
Campari Group	IT018	Italy	2016	1.3	22609.1	883.2	1.37	0.394	600.8	2.3	0.401	398.2	475	10	3.94	25.6	1615.75	56.5	10.0261	6.78355
Campari Group	IT018	Italy	2017	1.6	23745.3	969.2	1.404	0.443	661.4	2.1	0.458	466.1	887	10	4.43	24.5	1633.81	50.9	10.0751	6.87647
Campari Group	IT018	Italy	2018	0.8	22632.2	794.1	1.457	0.478	590.2	2	0.469	356.6	851	10	4.78	28.5	1387.52	45.8	10.0271	6.67721
Campari Group	IT018	Italy	2019	0.3	23582.8	958.7	1.464	0.54	644.8	2.5	0.487	391.5	398	10	5.4	24.6	1635.11	51.2	10.0683	6.86558
Campari Group	IT018	Italy	2020	-9	7842.3	285.2	1.478	0.485	216.9	2.2	0.481	152.7	515	10	4.85	27.5	546.222	48.4	8.96729	5.65319
Campari Group	IT018	Italy	2021	6.7	50837.4	1765.2	1.498	0.6	1863.9	3.1	0.619	918.6	2612	10	6	28.8	2952.07	54.3	10.8364	7.47602
Campari Group	IT018	Italy	2022	3.7	39531	1520.4	1.543	0.594	1345.5	2.9	0.66	780.2	2563	10	5.94	26	2667.36	60.4	10.5848	7.32673
Campari Group	IT018	Italy	2023	0.9	30411.9	1101.9	1.543	0.662	946.8	3.7	0.716	496.6	1567	10	6.62	27.6	1933.75	47.9	10.3226	7.00479
Campari Group	IT018	Italy	2024	0.5	28047.7	1027.4	1.61	0.699	1162.1	3.9	0.703	441.4	600	10	6.99	27.3	1757.96	62.1	10.2417	6.93479
Campari Group	IT018	Italy	2025	0.4	28642.1	1145.7	1.605	0.717	1053.3	3.5	0.643	428.8	1444	10	7.17	25	1905.15	55.1	10.2626	7.04377
Terna SpA	IT019	Italy	2000	3.7	56718.6	1370	1.021	0.043	653.3	0.2	0.048	959.3	861	10	0.43	41.4	3746.62	33.5	10.9459	7.22257
Terna SpA	IT019	Italy	2001	1.8	58282.7	1610	1.043	0.062	741.6	0.3	0.055	867.7	1682	10	0.62	36.2	4477.79	30.3	10.9731	7.38399
Terna SpA	IT019	Italy	2002	0.5	54490.1	1345.4	1.053	0.113	866.1	0.5	0.114	932.4	927	10	1.13	40.5	3691.86	39.1	10.9058	7.20445
Terna SpA	IT019	Italy	2003	0	55574.8	1482	1.046	0.08	777.4	0.4	0.071	902.2	3008	10	0.8	37.5	3991.62	35.6	10.9255	7.30115
Terna SpA	IT019	Italy	2004	1.5	68110.8	1641.2	1.109	0.108	1063.7	0.5	0.115	988	2781	10	1.08	41.5	4618.79	33.4	11.1289	7.40318
Terna SpA	IT019	Italy	2005	0.9	62795	1427.2	1.13	0.079	852.9	0.4	0.081	895.1	1272	10	0.79	44	3679.33	41.5	11.0476	7.26347
Terna SpA	IT019	Italy	2006	2	75215.5	1721.2	1.123	0.153	1103.5	0.7	0.142	1259.5	4205	10	1.53	43.7	4997.07	38.9	11.2281	7.45078
Terna SpA	IT019	Italy	2007	1.5	74328.1	2019.8	1.143	0.204	1440.7	1.2	0.175	1024.3	943	10	2.04	36.8	5508.97	35	11.2162	7.61075
Terna SpA	IT019	Italy	2008	-1	69656.2	1670.4	1.134	0.198	1229.6	1	0.173	1040.4	1104	10	1.98	41.7	4263.71	36.7	11.1513	7.42082
Terna SpA	IT019	Italy	2009	-5.5	51680.4	1321.7	1.184	0.234	949.3	1.1	0.206	714.8	2327	10	2.34	39.1	3628.62	44.5	10.8528	7.18667
Terna SpA	IT019	Italy	2010	1.7	91941.3	2388.1	1.227	0.26	2020.7	1.1	0.259	1498.3	3628	10	2.6	38.5	6399.35	43.1	11.4289	7.77825
Terna SpA	IT019	Italy	2011	0.6	78234.9	1774	1.208	0.272	1552.1	1.3	0.288	1331.3	2281	10	2.72	44.1	5158.66	51.5	11.2675	7.48099
Terna SpA	IT019	Italy	2012	-2.8	66967.8	1598.3	1.228	0.278	1548.3	1.4	0.242	1209.5	1187	10	2.78	41.9	4339.13	44.9	11.112	7.3767
Terna SpA	IT019	Italy	2013	-1.7	78735.6	1939.3	1.285	0.29	1677.4	1.6	0.265	1299	1315	10	2.9	40.6	5863.12	40.7	11.2739	7.57008
Terna SpA	IT019	Italy	2014	0.2	84267.1	1923.9	1.282	0.379	1852.8	2	0.363	1376.2	1859	10	3.79	43.8	5633.64	41.1	11.3417	7.56211
Terna SpA	IT019	Italy	2015	0.8	101106	2496.5	1.322	0.392	2891.7	1.9	0.424	1575.7	3726	10	3.92	40.5	6870.49	43.9	11.5239	7.82265
Terna SpA	IT019	Italy	2016	1.3	113029	3022.2	1.339	0.42	2999.2	2.3	0.389	1674.5	4835	10	4.2	37.4	7648.68	52.4	11.6354	8.01374
Terna SpA	IT019	Italy	2017	1.6	114202	2891.2	1.352	0.447	2898.6	2	0.505	1564.4	3536	10	4.47	39.5	8894.62	53.6	11.6457	7.96943
Terna SpA	IT019	Italy	2018	0.8	113778	2795.5	1.381	0.456	3499.1	2.5	0.449	1795.9	5463	10	4.56	40.7	7171.2	49	11.642	7.93577
Terna SpA	IT019	Italy	2019	0.3	110716	2661.5	1.408	0.483	2838.5	2.7	0.512	1927	2712	10	4.83	41.6	7177.27	49.2	11.6147	7.88665
Terna SpA	IT019	Italy	2020	-9	34759.1	895.9	1.419	0.506	1133.8	2.7	0.544	531.6	1287	10	5.06	38.8	2324.65	47.5	10.4562	6.79783
Terna SpA	IT019	Italy	2021	6.7	270178	6211	1.436	0.551	8599.9	3.3	0.586	3711.5	6795	10	5.51	43.5	15728.3	58.6	12.5068	8.73408
Terna SpA	IT019	Italy	2022	3.7	204082	5637.6	1.422	0.616	8115.2	3.3	0.554	3300.3	3855	10	6.16	36.2	16765.4	45.8	12.2263	8.63721
Terna SpA	IT019	Italy	2023	0.9	138889	3420.9	1.507	0.625	4527.9	3.4	0.648	2380	4846	10	6.25	40.6	8904.65	57.4	11.8414	8.13766
Terna SpA	IT019	Italy	2024	0.5	150157	3993.5	1.492	0.677	5226.4	2.9	0.615	2239.7	6236	10	6.77	37.6	12052.2	60.5	11.9194	8.29242
Terna SpA	IT019	Italy	2025	0.4	152482	3630.5	1.514	0.655	5869.4	3.6	0.595	2397.8	2736	10	6.55	42	9439.61	58.9	11.9348	8.19713
Snam SpA	IT020	Italy	2000	3.7	209543	2338.6	1.007	0.044	2115.2	0.2	0.04	6041.8	6896	10	0.44	89.6	4846.18	42.8	12.2527	7.75731
Snam SpA	IT020	Italy	2001	1.8	198360	2637.8	1.1	0.072	2295.6	0.3	0.076	5691.2	8106	10	0.72	75.2	4935.54	30.1	12.1978	7.8777
Snam SpA	IT020	Italy	2002	0.5	207369	2400.1	1.056	0.099	3096	0.6	0.097	7014.3	6679	10	0.99	86.4	5188.4	33.9	12.2423	7.78327
Snam SpA	IT020	Italy	2003	0	220810	2760.1	1.052	0.068	2575.5	0.4	0.058	6169.7	9130	10	0.68	80	5822.3	33.5	12.3051	7.92302
Snam SpA	IT020	Italy	2004	1.5	232358	2743.3	1.085	0.102	3617.8	0.6	0.096	8336.6	21240	10	1.02	84.7	5495.6	39.5	12.356	7.91692
Snam SpA	IT020	Italy	2005	0.9	236530	2832.7	1.156	0.16	3877.7	0.9	0.147	7864.7	26637	10	1.6	83.5	5821.64	39.5	12.3738	7.94899
Snam SpA	IT020	Italy	2006	2	272181	3236.4	1.147	0.158	4316.2	0.9	0.158	8694.2	23554	10	1.58	84.1	6647.82	46.2	12.5142	8.08222
Snam SpA	IT020	Italy	2007	1.5	266621	3405.1	1.112	0.168	4064	0.7	0.178	8687.5	18383	10	1.68	78.3	6900.91	46.3	12.4936	8.13303
Snam SpA	IT020	Italy	2008	-1	239907	2789.6	1.197	0.181	3764.5	0.7	0.198	7343.9	24786	10	1.81	86	5831.05	44.1	12.388	7.93365
Snam SpA	IT020	Italy	2009	-5.5	195446	2449.2	1.183	0.259	3752.5	1.5	0.24	5823.7	17333	10	2.59	79.8	4492.94	42.1	12.183	7.80352
Snam SpA	IT020	Italy	2010	1.7	312586	3721.3	1.224	0.271	6799.7	1.5	0.235	9122.4	22890	10	2.71	84	7808.65	37.9	12.6526	8.22183
Snam SpA	IT020	Italy	2011	0.6	305700	3687.6	1.293	0.279	7281.1	1.5	0.32	9144.8	13080	10	2.79	82.9	7280.26	41.1	12.6304	8.21273
Snam SpA	IT020	Italy	2012	-2.8	228581	2539.8	1.279	0.262	4630.1	1.5	0.246	8198.5	10028	10	2.62	90	5586.59	37.9	12.3396	7.83984
Snam SpA	IT020	Italy	2013	-1.7	283544	3765.5	1.317	0.358	7493.4	2	0.397	8805.8	14466	10	3.58	75.3	6875.76	54	12.5551	8.23364
Snam SpA	IT020	Italy	2014	0.2	328538	4127.4	1.29	0.364	7971	2	0.379	10665.5	30783	10	3.64	79.6	8043.79	54.7	12.7024	8.3254
Snam SpA	IT020	Italy	2015	0.8	375273	4353.5	1.327	0.373	9250.7	1.6	0.323	10260.2	25420	10	3.73	86.2	8755.88	39.1	12.8354	8.37874
Snam SpA	IT020	Italy	2016	1.3	408476	5118.7	1.396	0.442	12568.3	1.8	0.473	13537.1	21112	10	4.42	79.8	10042.5	45.2	12.9202	8.54066
Snam SpA	IT020	Italy	2017	1.6	441767	4859.9	1.399	0.459	13220.4	1.9	0.526	13622.7	28030	10	4.59	90.9	10266.9	50.2	12.9985	8.48877
Snam SpA	IT020	Italy	2018	0.8	416985	5352.8	1.403	0.463	10604.2	2.3	0.449	12979.7	38129	10	4.63	77.9	11038.3	46.1	12.9408	8.58538
Snam SpA	IT020	Italy	2019	0.3	383970	4576.5	1.419	0.497	11741.4	2.7	0.497	11288.8	20756	10	4.97	83.9	8943.21	55.5	12.8583	8.42869
Snam SpA	IT020	Italy	2020	-9	139993	1674.6	1.492	0.514	4762.8	2.1	0.532	4363.9	5670	10	5.14	83.6	3605.96	47.7	11.8493	7.42333
Snam SpA	IT020	Italy	2021	6.7	979997	11085.9	1.447	0.543	31129.8	2.8	0.619	26652.7	21582	10	5.43	88.4	22195.5	57.8	13.7953	9.31343
Snam SpA	IT020	Italy	2022	3.7	732223	9051	1.563	0.617	26400.2	2.6	0.629	20730.2	46567	10	6.17	80.9	17293.2	54	13.5038	9.11063
Snam SpA	IT020	Italy	2023	0.9	497700	5636.5	1.517	0.675	18516.4	3.9	0.734	18119.7	54369	10	6.75	88.3	10612.5	43.2	13.1178	8.63702
Snam SpA	IT020	Italy	2024	0.5	554227	6377.8	1.563	0.726	20462	4.3	0.619	17889.5	14539	10	7.26	86.9	13927.7	50.9	13.2253	8.76058
Snam SpA	IT020	Italy	2025	0.4	555049	6777.2	1.538	0.66	19563.7	3.4	0.683	17766.9	23100	10	6.6	81.9	13472.1	48.4	13.2268	8.82132
Mediobanca SpA	IT021	Italy	2000	3.7	19459.5	572.3	0.966	0.044	221.7	0.2	0.046	212.3	224	10	0.44	34	5661.3	39.7	9.87609	6.34966
Mediobanca SpA	IT021	Italy	2001	1.8	18271.8	528.1	1.007	0.071	246.3	0.3	0.074	189.4	583	10	0.71	34.6	5238.4	26.3	9.81311	6.26929
Mediobanca SpA	IT021	Italy	2002	0.5	18666.2	577.9	1.054	0.112	234.9	0.7	0.1	166.9	291	8.9	0.9968	32.3	5731.24	39.8	9.83447	6.3594
Mediobanca SpA	IT021	Italy	2003	0	19636.8	545.5	1.095	0.087	226	0.5	0.076	186.2	285	10	0.87	36	5592.69	31.5	9.88516	6.3017
Mediobanca SpA	IT021	Italy	2004	1.5	21347.9	626	1.074	0.111	264	0.6	0.106	238.7	272	10	1.11	34.1	6884.3	42.1	9.96871	6.43935
Mediobanca SpA	IT021	Italy	2005	0.9	21754.1	684.1	1.106	0.107	274.7	0.6	0.111	222.6	356	10	1.07	31.8	6219.94	37.1	9.98756	6.5281
Mediobanca SpA	IT021	Italy	2006	2	25117.8	711.6	1.134	0.13	342.9	0.6	0.149	273.7	952	10	1.3	35.3	7649.01	48.5	10.1313	6.56752
Mediobanca SpA	IT021	Italy	2007	1.5	26040.4	703.8	1.126	0.174	472.9	0.7	0.199	291	724	10	1.74	37	7543.99	47.3	10.1674	6.55649
Mediobanca SpA	IT021	Italy	2008	-1	23620.2	669.1	1.133	0.183	407.7	1	0.194	263.1	638	10	1.83	35.3	7325.76	45.2	10.0699	6.50593
Mediobanca SpA	IT021	Italy	2009	-5.5	17548.3	550.1	1.136	0.199	281.3	1.1	0.184	198	345	10	1.99	31.9	5154.32	52.5	9.77271	6.3101
Mediobanca SpA	IT021	Italy	2010	1.7	29418.2	931	1.136	0.213	566.3	1.2	0.232	288.2	882	10	2.13	31.6	9292.82	42.1	10.2894	6.83626
Mediobanca SpA	IT021	Italy	2011	0.6	27598.7	722.5	1.223	0.275	572.1	1.2	0.285	260.6	562	9.7	2.6675	38.2	7641.42	43.3	10.2255	6.58272
Mediobanca SpA	IT021	Italy	2012	-2.8	23455.5	681.8	1.236	0.284	568.8	1.3	0.308	240.3	482	10	2.84	34.4	7240.33	40.8	10.0629	6.52474
Mediobanca SpA	IT021	Italy	2013	-1.7	25634.9	720.1	1.266	0.316	496.2	1.9	0.315	257.9	784	10	3.16	35.6	7391.71	46.4	10.1517	6.57939
Mediobanca SpA	IT021	Italy	2014	0.2	32221.8	988.4	1.237	0.35	785.8	1.9	0.31	357	830	10	3.5	32.6	9935.44	42.3	10.3804	6.89609
Mediobanca SpA	IT021	Italy	2015	0.8	33789.5	1042.9	1.338	0.389	979.7	1.7	0.362	356.6	792	10	3.89	32.4	10360.2	48.3	10.4279	6.94976
Mediobanca SpA	IT021	Italy	2016	1.3	37140	1160.6	1.301	0.443	979.7	1.8	0.486	338.7	895	10	4.43	32	11362.2	53.3	10.5224	7.05669
Mediobanca SpA	IT021	Italy	2017	1.6	40157.4	1091.2	1.335	0.427	1112.9	2.2	0.443	443	1419	10	4.27	36.8	10183.2	50.4	10.6006	6.99503
Mediobanca SpA	IT021	Italy	2018	0.8	39346.9	1054.9	1.323	0.487	1108.7	2.5	0.457	408	839	10	4.87	37.3	10778.9	48.9	10.5802	6.9612
Mediobanca SpA	IT021	Italy	2019	0.3	40290.8	1220.9	1.347	0.514	1153.2	2.9	0.463	355.8	706	9.9	5.0886	33	13351.9	57.8	10.6039	7.10734
Mediobanca SpA	IT021	Italy	2020	-9	13228.8	389.1	1.342	0.544	391.2	3.2	0.612	114.3	165	9.8	5.3312	34	4129.7	45.2	9.49015	5.96384
Mediobanca SpA	IT021	Italy	2021	6.7	91060.5	2441.3	1.389	0.588	3374.2	3	0.647	993.7	1224	10	5.88	37.3	24841.6	57.2	11.4193	7.80029
Mediobanca SpA	IT021	Italy	2022	3.7	63765.7	1691.4	1.375	0.637	2310.9	3.2	0.567	717.3	1971	10	6.37	37.7	15224.3	47.3	11.063	7.43331
Mediobanca SpA	IT021	Italy	2023	0.9	52146.2	1561.3	1.415	0.647	1804.8	2.9	0.553	508	493	10	6.47	33.4	16772.1	48.4	10.8618	7.35327
Mediobanca SpA	IT021	Italy	2024	0.5	48192	1451.6	1.403	0.681	1941.1	2.8	0.692	464	927	10	6.81	33.2	14605	52.2	10.7829	7.28042
Mediobanca SpA	IT021	Italy	2025	0.4	48324.2	1408.9	1.445	0.732	1646.1	4.1	0.708	440.9	1270	10	7.32	34.3	14872.5	59.3	10.7857	7.25056
A2A SpA	IT022	Italy	2000	3.7	46605.4	1339.2	0.986	0.1	559.5	0.5	0.098	635.3	955	10	1	34.8	3461.59	25.6	10.7495	7.19983
A2A SpA	IT022	Italy	2001	1.8	44160.7	1380	0.947	0.122	567	0.6	0.118	675.8	1759	10	1.22	32	3984.03	45.4	10.6956	7.22984
A2A SpA	IT022	Italy	2002	0.5	46324.3	1489.5	1.031	0.102	675.2	0.4	0.109	664.7	608	10	1.02	31.1	4534.93	37.2	10.7434	7.3062
A2A SpA	IT022	Italy	2003	0	47978.8	1523.1	1.087	0.122	735.6	0.7	0.112	728.9	1184	10	1.22	31.5	4515.78	33.3	10.7785	7.3285
A2A SpA	IT022	Italy	2004	1.5	54286.3	1751.2	1.082	0.159	773.4	0.8	0.182	798	2764	10	1.59	31	5355.97	34.9	10.902	7.46806
A2A SpA	IT022	Italy	2005	0.9	55969.3	1716.8	1.074	0.175	844.4	1	0.177	879.5	2639	10	1.75	32.6	4552.86	38.9	10.9326	7.44822
A2A SpA	IT022	Italy	2006	2	57526.3	1759.2	1.132	0.185	1139	0.8	0.168	916.5	998	10	1.85	32.7	5400.1	26.6	10.96	7.47261
A2A SpA	IT022	Italy	2007	1.5	59587.9	1805.7	1.109	0.174	961.1	1	0.196	809.2	2054	10	1.74	33	5168.58	34.4	10.9952	7.4987
A2A SpA	IT022	Italy	2008	-1	53627.5	1620.2	1.127	0.222	867.9	1	0.25	786.8	2186	10	2.22	33.1	4487.81	41.6	10.8898	7.3903
A2A SpA	IT022	Italy	2009	-5.5	42628.5	1299.6	1.2	0.284	944.5	1.4	0.278	705.5	922	10	2.84	32.8	3315.46	48.9	10.6603	7.16981
A2A SpA	IT022	Italy	2010	1.7	71795.7	2051.3	1.188	0.28	1727.2	1.5	0.251	1061.9	1448	10	2.8	35	5942.6	35.9	11.1816	7.62623
A2A SpA	IT022	Italy	2011	0.6	73716.9	2318.1	1.228	0.279	1611.8	1.5	0.293	1106.9	3846	10	2.79	31.8	6657.16	46.1	11.208	7.7485
A2A SpA	IT022	Italy	2012	-2.8	57635.9	1934.1	1.185	0.264	1277	1.2	0.25	759.9	770	10	2.64	29.8	5583.21	41.5	10.9619	7.5674
A2A SpA	IT022	Italy	2013	-1.7	63971.7	2037.3	1.2	0.342	1486.3	1.8	0.303	947.3	2081	10	3.42	31.4	5588.88	40.5	11.0662	7.61938
A2A SpA	IT022	Italy	2014	0.2	72857.7	2269.7	1.249	0.349	1834.7	1.4	0.383	1113.4	1388	10	3.49	32.1	6696.43	45.3	11.1963	7.7274
A2A SpA	IT022	Italy	2015	0.8	81028.3	2588.8	1.269	0.404	2031.2	2.3	0.455	1172	2908	10	4.04	31.3	6626.22	41.1	11.3026	7.85895
A2A SpA	IT022	Italy	2016	1.3	96650	2722.5	1.252	0.459	2874.6	2	0.411	1451.7	2463	10	4.59	35.5	7773.85	38.6	11.4789	7.90931
A2A SpA	IT022	Italy	2017	1.6	93290.3	2870.5	1.318	0.459	2380.1	2.1	0.491	1432.6	3897	10	4.59	32.5	7625.66	56.2	11.4435	7.96224
A2A SpA	IT022	Italy	2018	0.8	99494.5	3178.7	1.291	0.5	2705.9	2.7	0.561	1505.2	3286	10	5	31.3	8997.1	48.8	11.5079	8.06423
A2A SpA	IT022	Italy	2019	0.3	95199.7	3101	1.306	0.526	3343	2.6	0.586	1589.6	1430	10	5.26	30.7	8419.91	48	11.4637	8.03948
A2A SpA	IT022	Italy	2020	-9	33932.3	953.2	1.338	0.548	1020.3	3.3	0.563	521.8	476	10	5.48	35.6	2928.63	51.5	10.4321	6.85982
A2A SpA	IT022	Italy	2021	6.7	224673	7271	1.324	0.554	7424	2.7	0.51	2943	5151	10	5.54	30.9	21340.3	53.7	12.3224	8.89165
A2A SpA	IT022	Italy	2022	3.7	160642	5132.3	1.381	0.668	6458.6	3.8	0.568	2282.5	7388	10	6.68	31.3	14634	52.5	11.9869	8.54331
A2A SpA	IT022	Italy	2023	0.9	122243	3968.9	1.412	0.667	4979.3	3.7	0.733	1935.1	5055	10	6.67	30.8	10271.3	54.5	11.7138	8.28624
A2A SpA	IT022	Italy	2024	0.5	107926	3437.1	1.412	0.655	3980.9	3.2	0.593	1418.5	3593	10	6.55	31.4	10215.7	52.5	11.5892	8.14238
A2A SpA	IT022	Italy	2025	0.4	119718	3861.9	1.41	0.749	5455	3.8	0.81	1936.7	5809	10	7.49	31	10281.2	56.4	11.6929	8.25891
Davide Campari SpA	IT023	Italy	2000	3.7	10726.5	424	1.008	0.095	164.5	0.5	0.099	182.9	460	10	0.95	25.3	793.443	37.1	9.28047	6.04973
Davide Campari SpA	IT023	Italy	2001	1.8	10504.9	410.3	1.007	0.108	171.8	0.5	0.097	173.9	382	10	1.08	25.6	696.957	38.1	9.2596	6.01689
Davide Campari SpA	IT023	Italy	2002	0.5	10850	411	1.096	0.111	143.6	0.5	0.098	168.4	559	10	1.11	26.4	683.155	42.2	9.29192	6.01859
Davide Campari SpA	IT023	Italy	2003	0	11808.6	498.3	1.095	0.081	144.9	0.4	0.081	191.7	546	10	0.81	23.7	817.447	44	9.37658	6.2112
Davide Campari SpA	IT023	Italy	2004	1.5	12360.4	492.4	1.076	0.151	178.5	0.6	0.148	185.1	317	10	1.51	25.1	888.12	36.9	9.42225	6.19929
Davide Campari SpA	IT023	Italy	2005	0.9	13362.9	508.1	1.085	0.138	191.8	0.7	0.155	195.4	319	10	1.38	26.3	836.475	37.3	9.50024	6.23068
Davide Campari SpA	IT023	Italy	2006	2	14531.3	558.9	1.144	0.158	252.7	0.8	0.181	256.6	547	10	1.58	26	978.358	35.9	9.58406	6.32597
Davide Campari SpA	IT023	Italy	2007	1.5	13772.2	593.6	1.123	0.217	291.9	1	0.19	257.5	355	10	2.17	23.2	966.043	39.9	9.53041	6.38621
Davide Campari SpA	IT023	Italy	2008	-1	12775	536.8	1.249	0.192	227.2	0.8	0.198	237.7	304	10	1.92	23.8	985.534	44.7	9.45525	6.28563
Davide Campari SpA	IT023	Italy	2009	-5.5	10312.9	435.1	1.2	0.274	248.4	1.5	0.265	166.7	503	10	2.74	23.7	809.54	39.6	9.24115	6.07558
Davide Campari SpA	IT023	Italy	2010	1.7	16301.3	590.6	1.248	0.267	368.1	1.3	0.246	264.1	596	10	2.67	27.6	1122.87	49.2	9.699	6.38114
Davide Campari SpA	IT023	Italy	2011	0.6	16705.2	676.3	1.289	0.319	348.7	1.6	0.29	298.5	765	10	3.19	24.7	1184.57	39.5	9.72348	6.51664
Davide Campari SpA	IT023	Italy	2012	-2.8	13018.7	542.4	1.27	0.296	316.4	1.5	0.291	204.6	313	10	2.96	24	960.05	47.1	9.47414	6.296
Davide Campari SpA	IT023	Italy	2013	-1.7	14294.3	574.1	1.284	0.304	276.6	1.3	0.298	251.7	385	10	3.04	24.9	975.892	46.5	9.56762	6.3528
Davide Campari SpA	IT023	Italy	2014	0.2	17503.7	636.5	1.309	0.392	405	1.6	0.394	291.6	747	10	3.92	27.5	1174.69	41.5	9.77017	6.45598
Davide Campari SpA	IT023	Italy	2015	0.8	20327.3	850.5	1.34	0.415	569.8	1.7	0.39	311.2	611	10	4.15	23.9	1468.08	46	9.91972	6.74582
Davide Campari SpA	IT023	Italy	2016	1.3	23303.4	903.2	1.358	0.38	616.5	2.2	0.433	420.7	1413	10	3.8	25.8	1528.9	50.7	10.0564	6.80594
Davide Campari SpA	IT023	Italy	2017	1.6	23597.2	861.2	1.416	0.506	710	2.5	0.479	352.6	869	10	5.06	27.4	1704.18	56.6	10.0689	6.75833
Davide Campari SpA	IT023	Italy	2018	0.8	22252.6	859.2	1.411	0.534	622.1	2.4	0.51	425	1355	10	5.34	25.9	1695.29	55.3	10.0102	6.756
Davide Campari SpA	IT023	Italy	2019	0.3	23190.4	865.3	1.444	0.518	783.7	2.2	0.485	342.2	547	10	5.18	26.8	1680.68	57.1	10.0515	6.76308
Davide Campari SpA	IT023	Italy	2020	-9	7622.5	307.4	1.458	0.559	211.4	2.9	0.545	118.6	361	10	5.59	24.8	541.238	52.8	8.93886	5.72815
Davide Campari SpA	IT023	Italy	2021	6.7	48412.6	1793.1	1.493	0.541	1458.9	3.2	0.534	858.5	697	10	5.41	27	3285.78	50.2	10.7875	7.4917
Davide Campari SpA	IT023	Italy	2022	3.7	38716.6	1397.7	1.506	0.563	1216.4	2.6	0.554	603.8	764	10	5.63	27.7	2670.99	57.6	10.564	7.24258
Davide Campari SpA	IT023	Italy	2023	0.9	29368.4	1160.8	1.524	0.641	961.2	3.1	0.566	423.6	827	10	6.41	25.3	1943.68	51.5	10.2877	7.05686
Davide Campari SpA	IT023	Italy	2024	0.5	28547	1023.2	1.527	0.669	1159.9	3	0.627	529.4	1240	10	6.69	27.9	1931.04	57.1	10.2593	6.93069
Davide Campari SpA	IT023	Italy	2025	0.4	27472.5	1194.5	1.574	0.704	1057.8	3.2	0.638	450.1	363	10	7.04	23	2175.83	61.1	10.2209	7.08548
Moncler SpA	IT024	Italy	2000	3.7	17764.8	471.2	1	0.086	232.6	0.5	0.075	278.8	504	10	0.86	37.7	1136.9	28.5	9.78497	6.15528
Moncler SpA	IT024	Italy	2001	1.8	16159.5	469.8	1.021	0.115	258.6	0.5	0.106	279.3	696	10	1.15	34.4	1252.48	39	9.69026	6.15231
Moncler SpA	IT024	Italy	2002	0.5	16527.5	491.9	1.051	0.134	234.3	0.6	0.131	321.5	315	10	1.34	33.6	1191.97	41	9.71278	6.19828
Moncler SpA	IT024	Italy	2003	0	19036.2	550.2	1.045	0.123	309.2	0.7	0.13	317.9	1075	10	1.23	34.6	1504.73	36.6	9.8541	6.31028
Moncler SpA	IT024	Italy	2004	1.5	18153.4	533.9	1.09	0.142	279	0.7	0.15	349.9	422	10	1.42	34	1340.05	39.1	9.80661	6.28021
Moncler SpA	IT024	Italy	2005	0.9	20083.6	545.8	1.081	0.163	369.3	0.9	0.183	330.3	322	10	1.63	36.8	1259.63	43.4	9.90766	6.30225
Moncler SpA	IT024	Italy	2006	2	20771.6	612.7	1.17	0.153	336.2	0.9	0.154	426.8	462	10	1.53	33.9	1582.14	38.1	9.94134	6.41788
Moncler SpA	IT024	Italy	2007	1.5	22120.3	668.3	1.126	0.187	440	1	0.179	452.6	624	10	1.87	33.1	1664.32	43.5	10.0043	6.50474
Moncler SpA	IT024	Italy	2008	-1	21178.9	553	1.17	0.201	407.8	0.9	0.229	359.2	1007	10	2.01	38.3	1257.41	37.5	9.96076	6.31536
Moncler SpA	IT024	Italy	2009	-5.5	15415.2	380.6	1.194	0.2	249.8	0.9	0.199	252.8	631	10	2	40.5	957.289	37.2	9.64311	5.94175
Moncler SpA	IT024	Italy	2010	1.7	26464.6	758.3	1.133	0.196	421	0.9	0.205	444.3	842	10	1.96	34.9	1812.46	40.4	10.1836	6.63108
Moncler SpA	IT024	Italy	2011	0.6	25685	746.7	1.213	0.27	519.6	1.2	0.309	478.8	1436	10	2.7	34.4	1912.22	45.5	10.1537	6.61566
Moncler SpA	IT024	Italy	2012	-2.8	21293.4	531	1.226	0.316	540.6	1.7	0.32	406.8	411	10	3.16	40.1	1319.12	53.1	9.96615	6.27476
Moncler SpA	IT024	Italy	2013	-1.7	22929.5	626.5	1.229	0.366	606.2	2.2	0.387	379.2	953	10	3.66	36.6	1503.09	54.4	10.0402	6.44015
Moncler SpA	IT024	Italy	2014	0.2	28673.7	796.5	1.297	0.43	893.7	1.9	0.45	503.8	612	10	4.3	36	1816.81	48.3	10.2637	6.68023
Moncler SpA	IT024	Italy	2015	0.8	28544.9	829.8	1.34	0.382	764.6	2	0.362	488.3	512	10	3.82	34.4	1971.14	49.3	10.2592	6.72118
Moncler SpA	IT024	Italy	2016	1.3	34446.1	975.8	1.313	0.385	868	2.2	0.384	703.6	1746	10	3.85	35.3	2246.24	46.6	10.4472	6.88326
Moncler SpA	IT024	Italy	2017	1.6	37057.5	931.1	1.375	0.433	1152.4	2.5	0.467	728.7	1824	10	4.33	39.8	2481.46	47.3	10.5202	6.83637
Moncler SpA	IT024	Italy	2018	0.8	35671.6	924.1	1.345	0.476	1050.4	2.3	0.537	602.6	1656	10	4.76	38.6	2265.21	51.5	10.4821	6.82882
Moncler SpA	IT024	Italy	2019	0.3	35494.3	977.8	1.358	0.548	992.8	2.6	0.571	723.3	2364	10	5.48	36.3	2570.13	41.6	10.4771	6.88531
Moncler SpA	IT024	Italy	2020	-9	11294.9	340.2	1.345	0.573	383.7	2.3	0.603	234.8	638	10	5.73	33.2	825.286	53.9	9.33211	5.82953
Moncler SpA	IT024	Italy	2021	6.7	75975	2064.5	1.38	0.566	2630	2.3	0.54	1289	3028	10	5.66	36.8	5067.67	46.5	11.2382	7.63264
Moncler SpA	IT024	Italy	2022	3.7	62065.2	1773.3	1.422	0.626	1925.3	2.9	0.669	1003.9	2230	10	6.26	35	4229.35	48.3	11.0359	7.4806
Moncler SpA	IT024	Italy	2023	0.9	44538.3	1333.5	1.409	0.662	1762.2	3.6	0.662	916.2	1053	10	6.62	33.4	3251.24	55.1	10.7041	7.19556
Moncler SpA	IT024	Italy	2024	0.5	45028.8	1243.9	1.449	0.648	1540.5	3	0.665	879.5	2205	10	6.48	36.2	3264.33	57.9	10.7151	7.12601
Moncler SpA	IT024	Italy	2025	0.4	46799.8	1170	1.541	0.739	1756.9	3	0.725	881.9	1456	10	7.39	40	2983.43	67.7	10.7536	7.06476
Brembo SpA	IT025	Italy	2000	3.7	22050.7	511.6	1.01	0.037	247.7	0.2	0.041	776.6	2136	10	0.37	43.1	745.239	42	10.0011	6.23754
Brembo SpA	IT025	Italy	2001	1.8	20806.4	508.7	1.004	0.098	270.4	0.4	0.091	731.1	893	10	0.98	40.9	819.878	38.1	9.94302	6.23186
Brembo SpA	IT025	Italy	2002	0.5	20655.4	439.5	1.022	0.106	278.7	0.6	0.12	859.3	1712	10	1.06	47	625.002	40.1	9.93573	6.08564
Brembo SpA	IT025	Italy	2003	0	21434.2	514	1.027	0.108	290.2	0.6	0.099	765.6	1648	10	1.08	41.7	770.683	28.7	9.97274	6.24222
Brembo SpA	IT025	Italy	2004	1.5	23407	512.2	1.071	0.131	335.4	0.7	0.133	863.7	1586	10	1.31	45.7	754.341	38.6	10.0608	6.23872
Brembo SpA	IT025	Italy	2005	0.9	23983.3	598.1	1.091	0.135	333.5	0.6	0.13	1039.4	3299	10	1.35	40.1	978.691	47.2	10.0851	6.39376
Brembo SpA	IT025	Italy	2006	2	28607.3	673.1	1.121	0.161	524.9	0.8	0.17	1261.1	2292	10	1.61	42.5	1036.17	39.8	10.2614	6.51189
Brembo SpA	IT025	Italy	2007	1.5	26540.3	584.6	1.133	0.18	442.7	1	0.159	959	2717	10	1.8	45.4	850.478	38.2	10.1864	6.37093
Brembo SpA	IT025	Italy	2008	-1	24702.7	569.2	1.146	0.21	425.3	1.1	0.207	1004.8	1950	10	2.1	43.4	890.005	39.5	10.1147	6.34423
Brembo SpA	IT025	Italy	2009	-5.5	20540.7	459.5	1.193	0.194	402.5	0.8	0.222	884	2398	10	1.94	44.7	707.286	39.7	9.93016	6.13014
Brembo SpA	IT025	Italy	2010	1.7	31413	795.3	1.185	0.246	610.1	1.2	0.211	1287	3772	10	2.46	39.5	1121.42	47.5	10.355	6.67872
Brembo SpA	IT025	Italy	2011	0.6	28741.8	662.3	1.264	0.283	608.6	1.2	0.28	1017.8	2743	10	2.83	43.4	1009.76	41.9	10.2661	6.49572
Brembo SpA	IT025	Italy	2012	-2.8	23514.7	587.9	1.215	0.317	532.6	1.8	0.27	913.2	2172	10	3.17	40	825.067	40.2	10.0654	6.37656
Brembo SpA	IT025	Italy	2013	-1.7	29473.2	635.2	1.225	0.304	635.7	1.6	0.339	1029.7	2373	10	3.04	46.4	889.545	42.6	10.2912	6.45394
Brembo SpA	IT025	Italy	2014	0.2	32220	714.4	1.279	0.399	786.5	2.3	0.44	1109.2	2437	10	3.99	45.1	1122.27	47.3	10.3803	6.57144
Brembo SpA	IT025	Italy	2015	0.8	37796.1	942.5	1.325	0.362	912.5	1.5	0.33	1357.7	3091	10	3.62	40.1	1472.24	50.8	10.54	6.84854
Brembo SpA	IT025	Italy	2016	1.3	42864.2	940	1.33	0.426	1253.8	2.3	0.447	1580.6	4315	10	4.26	45.6	1273.53	48.8	10.6658	6.84588
Brembo SpA	IT025	Italy	2017	1.6	44631.9	953.7	1.373	0.502	1380.7	2.3	0.522	1737.3	3504	10	5.02	46.8	1501.55	50.7	10.7062	6.86035
Brembo SpA	IT025	Italy	2018	0.8	44849	981.4	1.325	0.504	1516.3	2.9	0.484	2021.1	3838	10	5.04	45.7	1556.57	52.6	10.7111	6.88898
Brembo SpA	IT025	Italy	2019	0.3	43804.3	1068.4	1.399	0.562	1573.1	3.1	0.553	1948.9	5176	10	5.62	41	1518.25	57.1	10.6875	6.97392
Brembo SpA	IT025	Italy	2020	-9	15058.7	334.6	1.408	0.567	432.8	3.3	0.495	641.5	2207	10	5.67	45	489.14	51	9.61971	5.81294
Brembo SpA	IT025	Italy	2021	6.7	96834.8	2123.6	1.424	0.59	3148.8	2.8	0.584	3505.9	8425	10	5.9	45.6	3209.76	59.8	11.4808	7.66087
Brembo SpA	IT025	Italy	2022	3.7	71829.9	1575.2	1.379	0.625	2811.7	3.4	0.539	3226.3	7883	10	6.25	45.6	2381.73	58.8	11.1821	7.36214
Brembo SpA	IT025	Italy	2023	0.9	49457.2	1101.5	1.444	0.618	1594.1	3.4	0.627	2164.5	7284	10	6.18	44.9	1681.58	60.2	10.8089	7.00443
Brembo SpA	IT025	Italy	2024	0.5	56247.1	1382	1.462	0.676	2238	3.4	0.621	2558.3	8116	10	6.76	40.7	2111.49	47.9	10.9375	7.23129
Brembo SpA	IT025	Italy	2025	0.4	57866.5	1428.8	1.487	0.749	2594.3	4	0.753	2505.5	2244	10	7.49	40.5	2250.41	57.5	10.9659	7.26459
Inditex SA	ES001	Spain	2000	5.3	29696.2	173.6	0.964	0.096	391.6	0.5	0.103	374.5	867	10	0.96	171.1	281.929	26.5	10.2988	5.15675
Inditex SA	ES001	Spain	2001	3.7	29638.1	166.8	1.019	0.098	389.8	0.5	0.105	381.2	827	10	0.98	177.7	272.221	44.7	10.2968	5.1168
Inditex SA	ES001	Spain	2002	2.7	29792.4	159.9	1.048	0.131	474.2	0.7	0.141	370.1	858	10	1.31	186.3	259.803	32.7	10.302	5.07455
Inditex SA	ES001	Spain	2003	3.1	33961.8	179.1	1.021	0.161	640.7	0.8	0.174	399	1009	10	1.61	189.6	284.399	41.2	10.433	5.18794
Inditex SA	ES001	Spain	2004	3.3	36488.9	198.2	1.015	0.171	524.1	0.8	0.148	394.1	906	10	1.71	184.1	277.094	37.9	10.5048	5.28928
Inditex SA	ES001	Spain	2005	3.6	38893.3	227.8	1.096	0.133	506.7	0.6	0.114	454.2	1567	10	1.33	170.7	324.819	41.6	10.5686	5.42847
Inditex SA	ES001	Spain	2006	4.2	39457.1	232.2	1.12	0.208	825.3	0.9	0.224	478.1	949	10	2.08	169.9	321.616	41	10.583	5.4476
Inditex SA	ES001	Spain	2007	3.8	40584.1	235.1	1.142	0.189	814.5	0.9	0.183	503.2	1408	10	1.89	172.6	339.917	32.5	10.6111	5.46001
Inditex SA	ES001	Spain	2008	1.1	40317.6	256.6	1.174	0.251	788.7	1.3	0.285	520.3	1799	10	2.51	157.1	403.116	47.5	10.6045	5.54752
Inditex SA	ES001	Spain	2009	-3.6	31986.8	201.6	1.162	0.24	638.1	1.2	0.242	382.6	1222	10	2.4	158.7	297.015	38.6	10.3731	5.30629
Inditex SA	ES001	Spain	2010	0	40478.8	231.4	1.186	0.292	957.1	1.6	0.315	481.4	480	10	2.92	174.9	341.997	39.8	10.6085	5.44415
Inditex SA	ES001	Spain	2011	-1	37453.1	209.6	1.169	0.32	845	1.4	0.276	433.7	544	10	3.2	178.7	305.305	41.9	10.5308	5.3452
Inditex SA	ES001	Spain	2012	-2.9	35905.5	204.2	1.236	0.316	713.8	1.7	0.274	471.8	818	10	3.16	175.8	324.959	42.7	10.4886	5.3191
Inditex SA	ES001	Spain	2013	-1.7	36917.3	194.9	1.192	0.337	804.7	1.7	0.317	496.6	1678	10	3.37	189.4	272.41	40.2	10.5164	5.27249
Inditex SA	ES001	Spain	2014	1.4	50960.9	287.6	1.21	0.456	1487.8	2.3	0.478	644.7	1169	10	4.56	177.2	462.557	42.7	10.8388	5.66157
Inditex SA	ES001	Spain	2015	3.8	65989.4	398.5	1.222	0.444	1930.5	2.1	0.414	843	1518	10	4.44	165.6	565.84	46.5	11.0972	5.98771
Inditex SA	ES001	Spain	2016	3	73136.8	460.8	1.322	0.433	2009.1	2.6	0.492	973.2	1435	10	4.33	158.7	672.644	51	11.2001	6.13296
Inditex SA	ES001	Spain	2017	2.9	73720.1	471.1	1.319	0.433	1788.4	1.9	0.465	848.7	2395	10	4.33	156.5	767.748	53.1	11.208	6.15507
Inditex SA	ES001	Spain	2018	2.4	68536.4	384.2	1.336	0.5	2132.9	2.8	0.437	754.3	1667	10	5	178.4	532.674	48.9	11.1351	5.95116
Inditex SA	ES001	Spain	2019	2	68726.4	438.6	1.329	0.532	1899.7	2.8	0.526	846.3	1820	10	5.32	156.7	707.263	54.6	11.1379	6.08359
Inditex SA	ES001	Spain	2020	-10.8	15843.9	83.8	1.277	0.586	508.1	2.5	0.566	177.6	344	10	5.86	189	134.768	48.7	9.67054	4.42843
Inditex SA	ES001	Spain	2021	5.5	109710	594	1.366	0.575	3263.3	2.4	0.492	1256.1	4303	10	5.75	184.7	962.94	54	11.6056	6.38688
Inditex SA	ES001	Spain	2022	5.8	130277	691.1	1.352	0.582	4956.8	3.2	0.665	1595.3	1289	10	5.82	188.5	944.151	56.2	11.7774	6.53828
Inditex SA	ES001	Spain	2023	2.5	91340.3	551.6	1.382	0.659	3324.2	3.5	0.561	991.3	987	10	6.59	165.6	840.755	55.8	11.4223	6.31282
Inditex SA	ES001	Spain	2024	2.4	93854.7	523.2	1.445	0.695	3603.4	3	0.656	1070.4	871	10	6.95	179.4	860.671	54.1	11.4495	6.25996
Inditex SA	ES001	Spain	2025	1.8	93843.5	558.6	1.375	0.67	3936.1	3	0.742	1114.2	1605	10	6.7	168	833.914	63.6	11.4494	6.32543
Iberdrola SA	ES002	Spain	2000	5.3	60961	1451.5	0.983	0.01	718.4	0.1	0.009	900.2	1437	10	0.1	42	3708.79	41.3	11.018	7.28035
Iberdrola SA	ES002	Spain	2001	3.7	58433.3	1498.3	0.967	0.09	849.5	0.4	0.095	1063.9	1108	10	0.9	39	4385.86	33.8	10.9756	7.31209
Iberdrola SA	ES002	Spain	2002	2.7	58650.5	1351.4	1.015	0.074	814.1	0.3	0.077	1032.6	3100	10	0.74	43.4	3745.93	29.3	10.9794	7.2089
Iberdrola SA	ES002	Spain	2003	3.1	62590.2	1435.6	1.07	0.018	678.2	0.1	0.018	905.2	2221	10	0.18	43.6	3643	36.9	11.0444	7.26934
Iberdrola SA	ES002	Spain	2004	3.3	77894.9	1952.3	1.092	0.15	1217.7	0.8	0.158	1201.1	1930	10	1.5	39.9	5096.87	34.9	11.2631	7.57676
Iberdrola SA	ES002	Spain	2005	3.6	75436.4	1699	1.109	0.101	957.9	0.4	0.091	1204.1	3824	10	1.01	44.4	4864.76	37.5	11.231	7.4378
Iberdrola SA	ES002	Spain	2006	4.2	79306.3	1840.1	1.128	0.144	1259.1	0.6	0.154	1140.6	1220	10	1.44	43.1	4831.88	41.4	11.2811	7.51758
Iberdrola SA	ES002	Spain	2007	3.8	81413.7	1841.9	1.154	0.139	1380	0.7	0.147	1442	5021	10	1.39	44.2	4768.1	43.4	11.3073	7.51855
Iberdrola SA	ES002	Spain	2008	1.1	76450.1	1757.5	1.143	0.167	1396.2	1	0.185	1117.5	2652	10	1.67	43.5	5353.34	39.1	11.2444	7.47165
Iberdrola SA	ES002	Spain	2009	-3.6	62737.4	1552.9	1.191	0.22	1172.9	1.1	0.251	924.4	2819	10	2.2	40.4	4428.76	33.1	11.0467	7.34788
Iberdrola SA	ES002	Spain	2010	0	82244.5	2119.7	1.208	0.225	1637.7	1.3	0.213	1243.9	1494	10	2.25	38.8	5740.66	43	11.3175	7.65903
Iberdrola SA	ES002	Spain	2011	-1	75966.8	1952.9	1.229	0.276	1380.8	1.4	0.296	1390.9	4403	10	2.76	38.9	5372.62	55.3	11.2381	7.57707
Iberdrola SA	ES002	Spain	2012	-2.9	71898.3	1724.2	1.25	0.237	1300.6	1	0.247	1006	3121	10	2.37	41.7	5128.3	45.7	11.183	7.45252
Iberdrola SA	ES002	Spain	2013	-1.7	81054.1	1863.3	1.256	0.308	2034.6	1.5	0.293	1255.1	4054	10	3.08	43.5	4797.72	39	11.3029	7.5301
Iberdrola SA	ES002	Spain	2014	1.4	104729	2748.8	1.287	0.364	2856.1	1.7	0.337	1656.7	3461	10	3.64	38.1	7735.6	39.9	11.5591	7.91892
Iberdrola SA	ES002	Spain	2015	3.8	141125	3222	1.348	0.316	3018.7	1.6	0.337	2055.1	2388	10	3.16	43.8	9650.87	38.4	11.8574	8.07776
Iberdrola SA	ES002	Spain	2016	3	143335	3610.5	1.322	0.411	4347.4	2	0.441	2629.4	4525	10	4.11	39.7	9934.41	48.1	11.8729	8.1916
Iberdrola SA	ES002	Spain	2017	2.9	143343	3412.9	1.404	0.398	3206.6	2.1	0.34	2049	1678	10	3.98	42	9447.91	54.2	11.873	8.13532
Iberdrola SA	ES002	Spain	2018	2.4	146027	3209.4	1.35	0.498	4127.2	2.1	0.524	2560	7456	10	4.98	45.5	9554.43	54.2	11.8915	8.07384
Iberdrola SA	ES002	Spain	2019	2	152664	3461.8	1.414	0.472	4883.8	1.9	0.473	2493.1	6456	10	4.72	44.1	10358.8	50.8	11.936	8.14954
Iberdrola SA	ES002	Spain	2020	-10.8	32177.2	721.5	1.413	0.541	1021.7	3.2	0.5	524.5	1414	10	5.41	44.6	2135.16	51.8	10.379	6.58133
Iberdrola SA	ES002	Spain	2021	5.5	254646	6121.3	1.479	0.609	7775.9	3	0.616	4584.7	10007	10	6.09	41.6	17067.4	47.8	12.4476	8.71953
[truncated: 602 more rows]
